# Supplementary material for: Identification of acute respiratory distress syndrome subphenotypes de novo using routine clinical data: a retrospective analysis of ARDS clinical trials
Source: PubMed Central journal article supplement — BMJ Open. 2022 Jan 6;12(1):e053297. doi: 10.1136/bmjopen-2021-053297 (PMC8739395; doi:10.1136/bmjopen-2021-053297), 2022-01-06
Supplement: bmjopen-2021-053297.draft_revisions.pdf [file bmjopen-2021-053297.draft_revisions.pdf]

# BMJ Open

BMJ Open is committed to open peer review. As part of this commitment we make the peer review history of every article we publish publicly available.

When an article is published we post the peer reviewers' comments and the authors' responses online. We also post the versions of the paper that were used during peer review. These are the versions that the peer review comments apply to.

The versions of the paper that follow are the versions that were submitted during the peer review process. They are not the versions of record or the final published versions. They should not be cited or distributed as the published version of this manuscript.

BMJ Open is an open access journal and the full, final, typeset and author-corrected version of record of the manuscript is available on our site with no access controls, subscription charges or pay-per-view fees (<http://bmjopen.bmj.com>).

If you have any questions on BMJ Open's open peer review process please email [info.bmjopen@bmj.com](mailto:info.bmjopen@bmj.com)

# BMJ Open

## Identification of Acute Respiratory Distress Syndrome subphenotypes denovo using routine clinical data: a retrospective analysis of ARDS clinical trials

|                               |                                                                                                                                                                                                                                                                                                                                                                                                                                                                                                                                                                                                                                                                                                                                                                                                                                                                                                              |
|-------------------------------|--------------------------------------------------------------------------------------------------------------------------------------------------------------------------------------------------------------------------------------------------------------------------------------------------------------------------------------------------------------------------------------------------------------------------------------------------------------------------------------------------------------------------------------------------------------------------------------------------------------------------------------------------------------------------------------------------------------------------------------------------------------------------------------------------------------------------------------------------------------------------------------------------------------|
| Journal:                      | <i>BMJ Open</i>                                                                                                                                                                                                                                                                                                                                                                                                                                                                                                                                                                                                                                                                                                                                                                                                                                                                                              |
| Manuscript ID                 | bmjopen-2021-053297                                                                                                                                                                                                                                                                                                                                                                                                                                                                                                                                                                                                                                                                                                                                                                                                                                                                                          |
| Article Type:                 | Original research                                                                                                                                                                                                                                                                                                                                                                                                                                                                                                                                                                                                                                                                                                                                                                                                                                                                                            |
| Date Submitted by the Author: | 11-May-2021                                                                                                                                                                                                                                                                                                                                                                                                                                                                                                                                                                                                                                                                                                                                                                                                                                                                                                  |
| Complete List of Authors:     | Duggal, Abhijit ; Cleveland Clinic, Department of Critical Care Medicine<br>Kast, Rachel; Endpoint Health Inc, Department of Clinical Data Science<br>Van Ark, Emily; Endpoint Health Inc, Department of Clinical Data Science<br>Bulgarelli, Lucas; Endpoint Health Inc, Department of Clinical Data Science<br>Siuba, Matthew T.; Cleveland Clinic, Department of Critical Care Medicine<br>Osborn, Jeff; Endpoint Health Inc, Department of Clinical Data Science<br>Rey, Diego; Endpoint Health Inc, Department of Clinical Data Science<br>Zampieri, Fernando; Hospital do Coração<br>Cavalcanti, Alexandre ; HCor Research Institute<br>Maia, Israel; Hospital do Coracao<br>Paisani, Denise M; HCor Research Institute<br>Laranjeira, Ligia N; HCor Research Institute<br>Sarpa Neto, Ary; Monash University<br>Deliberato, Rodrigo Octávio; Endpoint Health Inc, Department of Clinical Data Science |
| Keywords:                     | Adult intensive & critical care < INTENSIVE & CRITICAL CARE, Adult intensive & critical care < ANAESTHETICS, RESPIRATORY MEDICINE (see Thoracic Medicine)                                                                                                                                                                                                                                                                                                                                                                                                                                                                                                                                                                                                                                                                                                                                                    |
|                               |                                                                                                                                                                                                                                                                                                                                                                                                                                                                                                                                                                                                                                                                                                                                                                                                                                                                                                              |

SCHOLARONE™  
Manuscripts

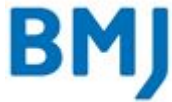

I, the Submitting Author has the right to grant and does grant on behalf of all authors of the Work (as defined in the below author licence), an exclusive licence and/or a non-exclusive licence for contributions from authors who are: i) UK Crown employees; ii) where BMJ has agreed a CC-BY licence shall apply, and/or iii) in accordance with the terms applicable for US Federal Government officers or employees acting as part of their official duties; on a worldwide, perpetual, irrevocable, royalty-free basis to BMJ Publishing Group Ltd ("BMJ") its licensees and where the relevant Journal is co-owned by BMJ to the co-owners of the Journal, to publish the Work in this journal and any other BMJ products and to exploit all rights, as set out in our [licence](#).

The Submitting Author accepts and understands that any supply made under these terms is made by BMJ to the Submitting Author unless you are acting as an employee on behalf of your employer or a postgraduate student of an affiliated institution which is paying any applicable article publishing charge ("APC") for Open Access articles. Where the Submitting Author wishes to make the Work available on an Open Access basis (and intends to pay the relevant APC), the terms of reuse of such Open Access shall be governed by a Creative Commons licence – details of these licences and which [Creative Commons](#) licence will apply to this Work are set out in our licence referred to above.

Other than as permitted in any relevant BMJ Author's Self Archiving Policies, I confirm this Work has not been accepted for publication elsewhere, is not being considered for publication elsewhere and does not duplicate material already published. I confirm all authors consent to publication of this Work and authorise the granting of this licence.

1  
2  
3 1 **Identification of Acute Respiratory Distress Syndrome subphenotypes**  
4  
5 2 **denovo using routine clinical data: a retrospective analysis of ARDS**  
6  
7 3 **clinical trials**  
8  
9 4

11 5 Abhijit Duggal MD<sup>1</sup>‡, Rachel Kast PhD<sup>2</sup>‡, Emily Van Ark PhD<sup>2</sup>‡, Lucas Bulgarelli BSc<sup>2</sup>‡,  
12 6 Matthew T. Siuba DO<sup>1</sup>, Jeff Osborn<sup>2</sup>, Diego Rey PhD<sup>2</sup>, Fernando G Zampieri MD PhD<sup>3</sup>,  
13 7 Alexandre B Cavalcanti MD PhD<sup>3</sup>, Israel S Maia MD<sup>3</sup>, Denise M Paisani PhD<sup>3</sup>, Ligia N  
14 8 Laranjeira<sup>3</sup>, Ary Serpa Neto MD MSc PhD,<sup>4,5,6,7,8</sup> Rodrigo Octávio Deliberato MD PhD<sup>2</sup>

18 9  
19  
20 10 ‡ Authors contributed equally

- 21 11  
22 12  
23 12 1. Department of Critical Care Medicine, Respiratory Institute, Cleveland Clinic,  
24 13 Cleveland, Ohio, USA.  
25 13  
26 14 2. Department of Clinical Data Science, Endpoint Health Inc, Palo Alto, California, USA.  
27 14  
28 15 3. HCor Research Institute, São Paulo, Brazil  
29 15  
30 16 4. Australian and New Zealand Intensive Care Research Centre (ANZIC-RC), School of  
31 17 Public Health and Preventive Medicine, Monash University, Melbourne, Australia.  
32 17  
33 18 5. Department of Critical Care, Melbourne Medical School, University of Melbourne,  
34 18 Austin Hospital, Melbourne, Australia.  
35 19  
36 19 6. Department of Intensive Care, Austin Hospital, Melbourne, Australia.  
37 20  
38 20 7. Data Analytics Research and Evaluation (DARE) Centre, Austin Hospital, Melbourne,  
39 21 Australia.  
40 21  
41 22 8. Department of Critical Care Medicine, Hospital Israelita Albert Einstein, São Paulo,  
42 23 Brazil.  
43 24  
44 24  
45 25

46 25  
47 26 **Correspondence:**

48 27 Abhijit Duggal MD

49 28 Address: 9500 Euclid Ave, L2-330, Cleveland, Ohio, 44195

50 29 E-mail: [duggala2@ccf.org](mailto:duggala2@ccf.org)  
51 30  
52  
53  
54  
55  
56  
57  
58  
59  
60

1  
2  
3  
4  
5  
6  
7  
8  
9  
10  
11  
12  
13  
14  
15  
16  
17  
18  
19  
20  
21  
22  
23  
24  
25  
26  
27  
28  
29  
30  
31  
32  
33  
34  
35  
36  
37  
38  
39  
40  
41  
42  
43  
44  
45  
46  
47  
48  
49  
50  
51  
52  
53  
54  
55  
56  
57  
58  
59  
60

31 **Word count (Abstract):** 235 words

32 **Word count (Text):** 2814 words

33 **Number of figures:** 2 figures

34 **Number of tables:** 3 tables

35 **Supplementary Material:** 01

36 **Key words:** Subphenotype, machine learning, ARDS, critical care, clinical data,  
37 clustering

For peer review only

1  
2  
3 38 **ABSTRACT**  
4

5 39 **Objectives:** The acute respiratory distress syndrome (ARDS) is a heterogenous  
6  
7  
8 40 condition, and identification of subphenotypes may help in better risk stratification.  
9

10 41 Identify ARDS subphenotypes using new simpler methodology and readily available  
11  
12 42 clinical variables using a retrospective analysis of previously published ARDS trials.  
13

14 43 **Setting:** Data from the U.S. ARDSNet trials and from the international ART trial.  
15  
16

17 44 **Participants:** 3763 patients from ARDSNet datasets and 1010 patients from the ART  
18  
19 45 dataset.  
20

21 46 **Primary and secondary outcome measures:** The primary outcome was 60-day or 28-  
22  
23 47 day mortality, depending on what was reported in the original trial. K-means cluster  
24  
25 48 analysis was performed to identify subgroups. For feature selection, sets. Sets of  
26  
27 49 candidate variables were tested to assess their ability to produce different probabilities  
28  
29 50 for mortality in each cluster. Clusters were compared to biomarker data, allowing  
30  
31 51 identification of subphenotypes.  
32  
33  
34

35 52 **Results:** Data from 4,773 patients was analyzed. Two subphenotypes (A and B) resulted  
36  
37 53 in optimal separation in the final model, which included nine routinely collected clinical  
38  
39 54 variables, namely: heart rate, mean arterial pressure, respiratory rate, bilirubin,  
40  
41 55 bicarbonate, creatinine, PaO<sub>2</sub>, arterial pH, and FiO<sub>2</sub>. Participants in subphenotype B  
42  
43 56 showed increased levels of pro-inflammatory markers, had consistently higher mortality,  
44  
45 57 lower number of ventilator-free days at day 28, and longer duration of ventilation  
46  
47 58 compared to patients in the subphenotype A.  
48  
49  
50  
51  
52  
53  
54  
55  
56  
57  
58  
59  
60

1  
2  
3  
4  
5  
6  
7  
8  
9  
10  
11  
12  
13  
14  
15  
16  
17  
18  
19  
20  
21  
22  
23  
24  
25  
26  
27  
28  
29  
30  
31  
32  
33  
34  
35  
36  
37  
38  
39  
40  
41  
42  
43  
44  
45  
46  
47  
48  
49  
50  
51  
52  
53  
54  
55  
56  
57  
58  
59  
60

59 **Conclusions:** Routinely available clinical data can successfully identify two distinct  
60 subphenotypes in adult ARDS patients. This work may facilitate implementation of  
61 precision therapy in ARDS clinical trials.  
62

For peer review only

1  
2  
3 63 **ARTICLE SUMMARY**  
4

5 64 **Strengths and limitations of this study**  
6

- 7
- 8 65 • Largest cohort of patients used to identify subphenotypes of ARDS patients.
  - 9
  - 10 66 • Subphenotypes were validated in the population of a large international ARDS  
11  
12 67 randomized controlled trial.
  - 13
  - 14 68 • Subphenotypes were identified by using only routinely collected clinical data.
  - 15
  - 16 69 • Our use of data exclusively from randomized controlled trials does not prove  
17  
18 70 generalizability to unselected ARDS populations.
  - 19
  - 20 71 • The clinical utility of the subphenotypes have to be validated in a prospective study.  
21  
22  
23  
24  
25  
26  
27  
28  
29  
30  
31  
32  
33  
34  
35  
36  
37  
38  
39  
40  
41  
42  
43  
44  
45  
46  
47  
48  
49  
50  
51  
52  
53  
54  
55  
56  
57  
58  
59  
60



## 73 INTRODUCTION

74 The Berlin definition of acute respiratory distress syndrome (ARDS) encompasses acute  
75 hypoxemic respiratory failure due to a wide variety of etiologies [1]. Due to this inclusion  
76 of heterogeneous conditions within the syndrome, there are significant clinical and  
77 biological differences that makes ARDS challenging to treat [2,3]. These differences  
78 amongst ARDS patients are associated with variation in risk of disease development and  
79 progression [3,4], potentially generating differential responses to treatments and  
80 interventions [5–10]. In spite of those evidences, clinical risk stratification of ARDS  
81 patients still solely depends on PaO<sub>2</sub>/FiO<sub>2</sub> ratios [11,12], possibly misleading the  
82 interpretation of results in clinical trials and clinicians when evaluating treatment options  
83 for patients [13].

84 Therefore, identifying groups of patients who have similar clinical, physiologic, or  
85 biomarker traits becomes relevant [6,14] as it can help with stratification of patients  
86 producing better targeted therapies and interventions [15]. These different groups can be  
87 defined as ARDS subphenotypes [4,14]. Two ARDS subphenotypes have been  
88 consistently identified in previous studies [6–10,16–18]. However, these models are  
89 complex, and significant barriers exist in their implementation and use in clinical practice.  
90 Existing models use up to 40 predictor variables, including biomarkers and other variables  
91 that are not readily available at the bedside [6–10,16–18]. These limitations explain the  
92 current status quo of ARDS care, where clinicians must depend on the limited prognostic  
93 value of PaO<sub>2</sub>/FiO<sub>2</sub> ratios instead of biologically distinct subphenotypes.

1  
2  
3 94 We hypothesized that the use of a simpler methodology and a small number of  
4  
5 95 easily available clinical variables could identify new ARDS subphenotypes and thus  
6  
7 96 provide the means to allow future implementation of bedside stratification.  
8  
9  
10 97  
11  
12  
13  
14  
15  
16  
17  
18  
19  
20  
21  
22  
23  
24  
25  
26  
27  
28  
29  
30  
31  
32  
33  
34  
35  
36  
37  
38  
39  
40  
41  
42  
43  
44  
45  
46  
47  
48  
49  
50  
51  
52  
53  
54  
55  
56  
57  
58  
59  
60

For peer review only

## 98 **METHODS**

### 99 **Patient and public involvement**

100 Patients or the public were not involved in the design, or conduct, or reporting, or  
101 dissemination plans of our research.

### 102 **Data source and participants**

103 We performed a retrospective study using a de-identified dataset pooling data from six  
104 randomized clinical trials in patients with ARDS, namely: ARMA, ALVEOLI, FACTT,  
105 EDEN, SAILS, and ART [19–24]. Patients in ARMA, ALVEOLI, FACTT, EDEN and SAILS  
106 trials were eligible if they met the American-European consensus for ARDS, including  
107 patients with a  $\text{PaO}_2 / \text{FiO}_2$  ratio  $< 300$  up to 48 hours before enrollment. From 1996 to  
108 2013, these trials enrolled 902, 549, 1000, 1000, and 745 patients, respectively, and  
109 tested a variety of interventions [19–23]. Between 2011 and 2017 the international ART  
110 study enrolled 1010 adult patients diagnosed with moderate to severe ARDS according  
111 to the Berlin definition ( $\text{PaO}_2 / \text{FiO}_2$  ratio  $< 200$ ) for less than 72 hours of duration and  
112 assessed two different ventilatory strategies [24]. To avoid biases due to high mortality in  
113 the high tidal volume group of the ARMA study [19], which has not been standard of care  
114 since the beginning of 2000, only 473 patients receiving low tidal volume in that study  
115 were included.

### 116 **Predictors**

117 Six clinical trials were assessed to identify a set of clinical variables recorded closest to  
118 time of randomization which were most commonly available across all datasets. The list  
119 of potential candidates was then further refined to include only those that are frequently  
120 observed in the routine care of ARDS patients at the time of its diagnosis. In order to

1  
2  
3 121 develop a clustering algorithm for potential rapid translation into clinical use, elements  
4  
5 122 which would not be commonly found in the electronic health records (EHR) at the time of  
6  
7 123 ARDS diagnosis, such as biomarker levels, ARDS risk factors, organ support apart from  
8  
9 124 mechanical ventilation settings, and severity scores, were excluded from model  
10  
11 125 development. The treatment assignment in the original trials, and clinical outcomes were  
12  
13 126 not considered in the model development.  
14  
15

16  
17 127 After all assessment, 16 variables that are routinely collected as part of the usual  
18  
19 128 care and which were uniformly present in all the trials were considered, including: age,  
20  
21 129 gender, arterial pH, PaO<sub>2</sub>, PaCO<sub>2</sub>, bicarbonate, creatinine, bilirubin, platelets, heart rate,  
22  
23 130 respiratory rate, mean arterial pressure, positive end-expiratory pressure (PEEP), plateau  
24  
25 131 pressure, FiO<sub>2</sub>, and tidal volume adjusted for predicted body weight (mL/kg PBW). The  
26  
27 132 PBW was calculated as equal to  $50 + 0.91$  (centimeters of height – 152.4) in males, and  
28  
29 133  $45.5 + 0.91$  (centimeters of height – 152.4) in females [18]. These variables were grouped  
30  
31 134 into five domains named demographics, arterial blood gases, laboratory values, vital  
32  
33 135 signs, and ventilatory variables. Plateau pressure was excluded due to a high rate of  
34  
35 136 missingness across the trials included in the training set. Amount of missing data in the  
36  
37 137 training datasets is reported in **eTable 1**.  
38  
39  
40  
41

## 42 138 **Outcomes**

43  
44 139 The primary outcome was 60-day mortality for all ARDSnet trials, and 28-day mortality  
45  
46 140 for ART trial. Secondary outcomes included 90-day mortality, number of ventilator free  
47  
48 141 days at day 28 [25], and the duration of mechanical ventilation in survivors within the first  
49  
50 142 28 days post enrollment.  
51  
52

## 53 143 **Data preparation**

1  
2  
3 144 Data preprocessing was performed before modeling, and the pooled dataset was  
4  
5 145 assessed for completeness and consistency. Patients with values out of the plausible  
6  
7 146 physiological range for a specific variable were excluded from the final analysis  
8  
9  
10 147 (described in **eTable 2**). The training dataset was constructed using data from the two  
11  
12 148 largest ARDSnet trials, EDEN and FACTT. The validation dataset was sourced from the  
13  
14 149 four remaining trials: ALVEOLI, ARMA, SAILS, and ART. Means and standard deviations  
15  
16 150 for z-scoring variables were calculated from the training dataset and subsequently applied  
17  
18 151 to the validation data.

### 152 **Statistical analysis**

153 Baseline and outcome data were presented according to the assigned cluster.  
154 Continuous variables were presented as medians with their interquartile ranges and  
155 categorical variables as total number and percentage. Proportions were compared using  
156 Fisher exact tests and continuous variables were compared using the Wilcoxon rank-sum  
157 test. Study outcomes were further compared using the median and mean absolute  
158 differences for continuous and categorical values, respectively.

### 159 **Model development and validation**

160 For the model development, the K-means clustering algorithm was used. K-means is one  
161 of the simplest and most commonly used classes of clustering algorithms. In critical care  
162 research, unsupervised machine learning techniques have already been used in several  
163 studies, attempting to find homogeneous subgroups within a broad heterogeneous  
164 population [26]. This specific algorithm identifies a K number of clusters in a dataset by  
165 finding K centroids within the n-dimensional space of clinical features [26].

1  
2  
3 166 For feature selection, different sets of candidate variables were tested to assess  
4  
5 167 their ability to produce significantly different mortality probabilities in each cluster using  
6  
7 168 the minimum amount of readily available clinical data. For each set of candidate variables,  
8  
9  
10 169 the optimal number of clusters was determined by comparing models with between 2 and  
11  
12 170 5 clusters, using the Elbow method [27] and the Calinski-Harabasz index [28]. Information  
13  
14 171 about the methods for selecting number of clusters are provided in the supplemental  
15  
16 172 material.

17 173  
18  
19 174 The following steps were performed for the final model selection: 1) all predictors  
20  
21 175 were assessed for correlation (**eTable 3**); and 2) ten different combinations of the  
22  
23 176 proposed variables were investigated. These combinations were developed based on the  
24  
25 177 perceived clinical importance of each variable and its combinations. All 10 models were  
26  
27 178 tested for the optimal number of clusters and based on both the Elbow method and the  
28  
29 179 Calinski-Harabasz index, as described above. The models were then compared, aiming  
30  
31 180 for the minimum set of variables with high 60-day mortality separation. The description of  
32  
33 181 each model is show in **eTable 4**.

34  
35 182 Biological and clinical characteristics of the clusters were evaluated using clinical,  
36  
37 183 laboratory, and (when available) biomarker data to establish subphenotypes [4]. All  
38  
39 184 iterations in model development were done on the training set and the generalizability of  
40  
41 185 the final model was assessed using the validation dataset. K-means clustering analysis  
42  
43 186 is structured to ignore cases with missing data. No assumption was made for missingness  
44  
45 187 and we therefore conducted a complete case analysis. Model development and  
46  
47 188 evaluation was performed using Python version 3.8 and scikit-learn 0.23.1.

#### 189 **Data availability**

1  
2  
3 189 Data from the ARDSnet studies (EDEN, FACTT, ARMA, ALVEOLI and SAILS) is publicly  
4  
5 190 available from the NHLBI ARDS Network and data from the ART trial can be requested  
6  
7  
8 191 from study authors.  
9

10 192  
11  
12  
13  
14  
15  
16  
17  
18  
19  
20  
21  
22  
23  
24  
25  
26  
27  
28  
29  
30  
31  
32  
33  
34  
35  
36  
37  
38  
39  
40  
41  
42  
43  
44  
45  
46  
47  
48  
49  
50  
51  
52  
53  
54  
55  
56  
57  
58  
59  
60

For peer review only

## 193 RESULTS

### 194 Participants

195 Data from 4777 clinical trial patients were considered for inclusion. In total, 4 patients  
 196 were excluded for having clinical measurements outside plausible range. The remaining  
 197 1998 patients from EDEN and FACTT trials were included in the training set, while the  
 198 2775 patients from ARMA, ALVEOLI, SAILS, and ART were included in the validation  
 199 cohort.

200 Baseline characteristics of the patients in the training and validation sets are  
 201 presented in **Table 1**. Pneumonia was the prevailing etiology followed by sepsis and  
 202 aspiration in all trials. Between 29.3% to 72.7% of the patients were receiving  
 203 vasopressors at the time of randomization. At randomization, PaO<sub>2</sub> / FiO<sub>2</sub> ratio ranged  
 204 from 112 (75 - 158) to 134 (96 - 185) mmHg, and PEEP from 8 (5 - 10) to 12 (10 - 14)  
 205 cmH<sub>2</sub>O across trials. Mortality at 60 days for the ARDSnet trials ranged from 22.7% to  
 206 30.1%, while in the ART trial mortality at 28 days was 58.8%.

207

| Table 1 - Baseline Characteristics and Clinical Outcomes in the Included Trials |                         |                    |                           |                    |                    |                    |
|---------------------------------------------------------------------------------|-------------------------|--------------------|---------------------------|--------------------|--------------------|--------------------|
|                                                                                 | Training set (n = 1998) |                    | Validation set (n = 2775) |                    |                    |                    |
|                                                                                 | EDEN<br>(n = 1000)      | FACTT<br>(n = 998) | ALVEOLI<br>(n = 549)      | ARMA<br>(n = 472)  | ART<br>(n = 1010)  | SAILS<br>(n = 744) |
| Age, year                                                                       | 52.0 (42.0 - 63.0)      | 49.0 (38.0 - 60.8) | 50.0 (39.0 - 65.0)        | 50.0 (37.8 - 65.0) | 52.0 (36.0 - 64.0) | 55.0 (42.0 - 66.0) |
| Male gender - no. (%)                                                           | 510 (51.0)              | 533 (53.4)         | 302 (55.0)                | 285 (60.4)         | 631 (62.5)         | 365 (49.0)         |
| Etiology - no. (%)                                                              |                         |                    |                           |                    |                    |                    |
| Pneumonia                                                                       | 650 (65.0)              | 471 (47.2)         | 221 (40.3)                | 145 (30.7)         | 555 (55.0)         | 526 (70.7)         |
| Sepsis                                                                          | 147 (14.7)              | 231 (23.1)         | 120 (21.9)                | 125 (26.5)         | 196 (19.4)         | 147 (19.8)         |
| Aspiration                                                                      | 96 (9.6)                | 149 (14.9)         | 84 (15.3)                 | 72 (15.3)          | 58 (5.7)           | 49 (6.6)           |
| Trauma                                                                          | 36 (3.6)                | 74 (7.4)           | 45 (8.2)                  | 59 (12.5)          | 31 (3.1)           | 6 (0.8)            |
| Other                                                                           | 71 (7.1)                | 73 (7.3)           | 79 (14.4)                 | 71 (15.0)          | 170 (16.8)         | 16 (2.2)           |
| Severity of Illness*                                                            | 73.0 (59.0 - 89.0)      | 78.0 (62.0 - 94.0) | 78.0 (64.0 - 93.0)        | 83.0 (70.0 - 97.0) | 63.0 (50.2 - 75.0) | 76.0 (61.0 - 92.0) |
| Vasopressors - no. (%)                                                          | 489 (48.9)              | 397 (40.5)         | 156 (29.3)                | 147 (31.3)         | 734 (72.7)         | 395 (54.2)         |
| Laboratory tests                                                                |                         |                    |                           |                    |                    |                    |



|                                                                                                                           |                    |                    |                    |                    |                    |                    |
|---------------------------------------------------------------------------------------------------------------------------|--------------------|--------------------|--------------------|--------------------|--------------------|--------------------|
| White blood cell count, 10 <sup>9</sup> /L                                                                                | 12.0 (7.8 - 16.7)  | 11.8 (7.2 - 17.1)  | 11.6 (7.7 - 15.7)  | 11.5 (7.5 - 16.2)  | ---                | 13.9 (8.7 - 20.0)  |
| Platelets, 10 <sup>9</sup> /L                                                                                             | 169 (108 - 241)    | 183 (106 - 258)    | 157 (83 - 247)     | 135 (80 - 211)     | 175 (106 - 263)    | 167 (96 - 247)     |
| Creatinine, mg/dL                                                                                                         | 1.2 (0.8 - 2.0)    | 1.0 (0.7 - 1.5)    | 1.0 (0.7 - 1.7)    | 1.1 (0.8 - 1.7)    | 1.3 (0.8 - 2.2)    | 1.0 (0.7 - 1.7)    |
| Bilirubin, mg/dL                                                                                                          | 0.8 (0.5 - 1.4)    | 0.8 (0.5 - 1.6)    | 0.8 (0.5 - 1.5)    | 1.0 (0.6 - 2.1)    | 0.8 (0.4 - 1.5)    | 0.8 (0.5 - 1.4)    |
| Arterial blood gas                                                                                                        |                    |                    |                    |                    |                    |                    |
| pH*                                                                                                                       | 7.36 (7.30 - 7.42) | 7.37 (7.30 - 7.43) | 7.40 (7.34 - 7.44) | 7.41 (7.35 - 7.45) | 7.28 (7.19 - 7.36) | 7.37 (7.31 - 7.42) |
| PaO <sub>2</sub> , mmHg                                                                                                   | 83 (68 - 108)      | 79 (67 - 100)      | 77 (67 - 93)       | 76.5 (67 - 93)     | 112 (81 - 155)     | 83 (69 - 103)      |
| PaO <sub>2</sub> / FiO <sub>2</sub>                                                                                       | 125 (86 - 178)     | 118 (80 - 163)     | 134 (96 - 185)     | 112 (75 - 158)     | 112 (81 - 155)     | 133 (89 - 178)     |
| PaCO <sub>2</sub> , mmHg                                                                                                  | 38 (34 - 45)       | 39 (34 - 45)       | 38 (33 - 43)       | 36 (31 - 41)       | 50 (42 - 62)       | 39 (34 - 45)       |
| Bicarbonate, mmol/L                                                                                                       | 21.0 (18.0 - 25.0) | 21.0 (17.4 - 25.0) | 22.0 (18.0 - 26.0) | 22.0 (18.0 - 25.0) | 22.9 (19.4 - 26.3) | 22.0 (18.0 - 25.0) |
| Ventilatory variables                                                                                                     |                    |                    |                    |                    |                    |                    |
| Tidal volume, mL                                                                                                          | 410 (360 - 470)    | 450 (400 - 510)    | 500 (420 - 600)    | 700 (600 - 750)    | 350 (308 - 400)    | 400 (350 - 460)    |
| Per PBW, mL/kg PBW                                                                                                        | 6.3 (6.0 - 7.3)    | 7.1 (6.1 - 8.1)    | 7.9 (6.6 - 9.4)    | 10.2 (9.0 - 11.3)  | 5.9 (5.1 - 6.1)    | 6.2 (6.0 - 7.1)    |
| Plateau pressure, cmH <sub>2</sub> O                                                                                      | 24.0 (20.0 - 27.0) | 26.0 (22.0 - 30.0) | 26.0 (22.0 - 31.0) | 29.0 (24.8 - 34.0) | 26.0 (22.0 - 29.0) | 24.0 (19.0 - 28.0) |
| PEEP, cmH <sub>2</sub> O                                                                                                  | 10 (5 - 12)        | 10 (5 - 12)        | 10 (5 - 12)        | 8 (5 - 10)         | 12 (10 - 14)       | 10 (5 - 11)        |
| FiO <sub>2</sub>                                                                                                          | 0.60 (0.50 - 0.80) | 0.60 (0.50 - 0.80) | 0.60 (0.50 - 0.80) | 0.60 (0.50 - 0.74) | 0.70 (0.60 - 1.00) | 0.60 (0.40 - 0.70) |
| Clinical outcomes                                                                                                         |                    |                    |                    |                    |                    |                    |
| 28-day mort. - no. (%)                                                                                                    | ---                | ---                | ---                | ---                | 594 (58.8)         | ---                |
| 60-day mort. - no. (%)                                                                                                    | 227 (22.7)         | 268 (26.9)         | 144 (26.2)         | 141 (30.1)         | ---                | 199 (26.7)         |
| 90-day mort. - no. (%)                                                                                                    | 233 (23.3)         | 283 (28.6)         | 148 (27.5)         | 143 (30.8)         | ---                | 204 (27.4)         |
| Ventilator-free days, day 28                                                                                              | 20.0 (0.0 - 24.0)  | 17.0 (0.0 - 23.0)  | 18.0 (0.0 - 24.0)  | 13.0 (0.0 - 23.0)  | 0.0 (0.0 - 13.0)   | 20.0 (0.0 - 25.0)  |
| Ventilator days in survivors                                                                                              | 7.0 (4.0 - 13.0)   | 8.0 (5.0 - 16.0)   | 8.0 (4.0 - 14.0)   | 8.0 (4.0 - 15.0)   | 13.0 (8.0 - 20.0)  | 6.0 (4.0 - 11.0)   |
| Data are median (quartile 25 <sup>th</sup> - quartile 75 <sup>th</sup> ) or N (%)                                         |                    |                    |                    |                    |                    |                    |
| Abbreviations: 28-day mort. is 28-day mortality, 60-day mort. is 60 days mortality, and 90-day mort. is 90-day mortality. |                    |                    |                    |                    |                    |                    |
| * Except for ART, that uses SAPS-3, all studies use APACHE-IV                                                             |                    |                    |                    |                    |                    |                    |

208

## 209 Predictor variables and model selection

210 The correlation between the 15 variables selected for clustering is shown in **eTable 3**.

211 The strongest correlation was between PEEP and FiO<sub>2</sub> ( $r = 0.49$ ). The comparison of the

212 10 models regarding the optimal number of clusters based on both the Elbow method and

the Calinski-Harabasz index is shown in **eFigure 1**. In all models and methods, two clusters were a better fit than a higher number of clusters.

Across the ten models, absolute mortality difference between cluster 1 and cluster 2 ranged from 3.9% to 13.1% for the FACTT study and between 0.1% to 8.1% for EDEN (**Table 2**). The models with the highest 60-day absolute mortality separation between the clusters for each of the two trials in the training set were then further evaluated. Models 6, 5, and 8 were consistently amongst the models with highest separation (**Table 2**). Model 8 was selected for further investigation, as it the fewest variables (**eTable 4**).

**Table 2 - Absolute 60-day Mortality Difference Among Clusters per Trial and Model**

| FACTT trial<br>(n = 998) |                 |                                     | EDEN trial<br>(n = 1000) |                 |                                     |
|--------------------------|-----------------|-------------------------------------|--------------------------|-----------------|-------------------------------------|
| Model                    | Patients scored | Mortality difference among clusters | Model                    | Patients scored | Mortality difference among clusters |
| 6                        | 93.5%           | 13.1%                               | 7                        | 77.7%           | 8.1%                                |
| 2                        | 57.4%           | 12.5%                               | 8                        | 77.7%           | 8.1%                                |
| 5                        | 65.5%           | 12.2%                               | 6                        | 84.1%           | 6.7%                                |
| 8                        | 70.2%           | 11.6%                               | 5                        | 71.7%           | 6.5%                                |
| 7                        | 70.2%           | 11.4%                               | 9                        | 84.7%           | 6.1%                                |
| 1                        | 57.4%           | 11.2%                               | 3                        | 77.7%           | 4.4%                                |
| 4                        | 70.2%           | 10.6%                               | 4                        | 77.7%           | 4.0%                                |
| 9                        | 93.5%           | 10.4%                               | 2                        | 57.7%           | 3.9%                                |
| 3                        | 70.2%           | 10.1%                               | 10                       | 87.3%           | 2.8%                                |
| 10                       | 98.8%           | 3.9%                                | 1                        | 57.7%           | 0.1%                                |

### Clinical characteristics of each cluster

Based on model 8, only nine clinical and laboratory variables were needed to identify the two distinct clusters in ARDS patients, namely: heart rate, mean arterial pressure, respiratory rate, bilirubin, bicarbonate, creatinine, PaO<sub>2</sub>, arterial pH, and FiO<sub>2</sub>. For each variable in the model, opposing measurements could be observed for each cluster

(Figure 1 and eFigure 2). For the ARDSnet trials, the incidence of cluster 1 patients varied from 57.8% (EDEN) to 73.6% (ARMA), and 41.5% of ART patients were part of cluster 1. Across all trials, patients in cluster 2 had higher severity of illness, rate of vasopressor, heart rate, respiratory rate, creatinine, and bilirubin, as well as lower platelets, pH, BUN, and bicarbonate compared to patients in cluster 1 (eTable 5, 6 and 7). In addition, 28-, 60-, and 90-day mortality rate was higher in patients in cluster 2 in all trials (Table 3). Likewise, for each trial, ventilator-free days at day 28 was lower in patients in cluster 2 compared to cluster 1, and duration of ventilation in survivors was longer in cluster 1.

|                                            | Cluster 1         | Cluster 2         | Difference (95% CI)    | p value |
|--------------------------------------------|-------------------|-------------------|------------------------|---------|
| <b>Training set</b>                        |                   |                   |                        |         |
| FACTT                                      | <i>n</i> = 407    | <i>n</i> = 294    |                        |         |
| 60-day mortality - no. (%)                 | 94 (23.1)         | 102 (34.7)        | 11.6% (4.9% to 18.3%)  | 0.001   |
| 90-day mortality - no. (%)                 | 103 (25.4)        | 106 (36.3)        | 10.9% (4.1% to 17.8%)  | 0.002   |
| Ventilator-free days at day 28             | 19.0 (0.0 - 24.0) | 10.0 (0.0 - 21.0) | -9.0 (-11.9 to -6.1)   | < 0.001 |
| Duration of ventilation in survivors, days | 8.0 (4.0 - 13.0)  | 10.0 (7.0 - 19.0) | 2.0 (0.5 to 3.5)       | < 0.001 |
| <b>EDEN</b>                                |                   |                   |                        |         |
|                                            | <i>n</i> = 449    | <i>n</i> = 328    |                        |         |
| 60-day mortality - no. (%)                 | 87 (19.4)         | 90 (27.4)         | 8.1% (2.1% to 14.0%)   | 0.010   |
| 90-day mortality - no. (%)                 | 90 (20.0)         | 93 (28.4)         | 8.3% (2.3% to 14.3%)   | 0.009   |
| Ventilator-free days at day 28             | 21.0 (0.0 - 25.0) | 15.0 (0.0 - 22.2) | -6.0 (-8.1 to -3.9)    | < 0.001 |
| Duration of ventilation in survivors, days | 6.0 (4.0 - 11.0)  | 8.0 (6.0 - 18.0)  | 2.0 (0.9 to 3.1)       | < 0.001 |
| <b>Validation set</b>                      |                   |                   |                        |         |
| <b>ALVEOLI</b>                             |                   |                   |                        |         |
|                                            | <i>n</i> = 336    | <i>n</i> = 157    |                        |         |
| 60-day mortality - no. (%)                 | 59 (17.6)         | 68 (43.3)         | 25.8% (17.7% to 33.8%) | < 0.001 |
| 90-day mortality - no. (%)                 | 60 (18.1)         | 70 (45.5)         | 27.3% (19.2% to 35.5%) | < 0.001 |
| Ventilator-free days at day 28             | 21.0 (4.8 - 25.0) | 2.0 (0.0 - 19.0)  | -19.0 (-20.8 to -17.2) | < 0.001 |
| Duration of ventilation in survivors, days | 7.0 [4.0,13.0]    | 11.0 (6.0 - 22.2) | 4.0 (2.1 to 5.9)       | < 0.001 |
| <b>ARMA</b>                                |                   |                   |                        |         |
|                                            | <i>n</i> = 279    | <i>n</i> = 100    |                        |         |
| 60-day mortality - no. (%)                 | 69 (24.8)         | 42 (42.0)         | 17.2% (6.9% to 27.5%)  | 0.002   |
| 90-day mortality - no. (%)                 | 70 (25.5)         | 42 (42.0)         | 16.5% (6.0% to 26.9%)  | 0.003   |
| Ventilator-free days at day 28             | 17.0 (0.0 - 24.0) | 2.0 (0.0 - 19.0)  | -15.0 (-18.6 to -11.4) | < 0.001 |
| Duration of ventilation in survivors, days | 7.0 (4.0 - 13.8)  | 11.0 (5.0 - 18.0) | 4.0 (1.5 to 6.5)       | 0.018   |
| <b>SAILS</b>                               |                   |                   |                        |         |
|                                            | <i>n</i> = 319    | <i>n</i> = 188    |                        |         |
| 60-day mortality - no. (%)                 | 80 (25.1)         | 60 (31.9)         | 6.8% (-1.2% to 14.9%)  | 0.119   |
| 90-day mortality - no. (%)                 | 81 (25.4)         | 63 (33.5)         | 8.1% (0.0% to 16.3%)   | 0.063   |

|                                                                                                                                                                                                                                                                 |                   |                   |                        |         |
|-----------------------------------------------------------------------------------------------------------------------------------------------------------------------------------------------------------------------------------------------------------------|-------------------|-------------------|------------------------|---------|
| Ventilator-free days at day 28                                                                                                                                                                                                                                  | 21.0 (0.0 - 25.0) | 16.0 (0.0 - 23.0) | -5.0 (-7.3 to -2.7)    | < 0.001 |
| Duration of ventilation in survivors, days                                                                                                                                                                                                                      | 6.0 (3.0 - 10.0)  | 8.0 (5.0 - 14.0)  | 2.0 (0.7 to 3.3)       | < 0.001 |
| ART                                                                                                                                                                                                                                                             | <i>n</i> = 211    | <i>n</i> = 298    |                        |         |
| 28-day mortality - no. (%)                                                                                                                                                                                                                                      | 81 (38.4)         | 180 (60.4)        | 22.0% (13.4% to 30.7%) | < 0.001 |
| Ventilator-free days at day 28                                                                                                                                                                                                                                  | 0.0 (0.0 - 17.0)  | 0.0 (0.0 - 7.8)   | -0.0 (-1.0 to 1.0)     | < 0.001 |
| Duration of ventilation in survivors, days                                                                                                                                                                                                                      | 12.0 (8.0 - 20.0) | 13.5 (8.0 - 20.0) | 2.0 (-0.3 to 4.2)      | 0.570   |
| Data are median (quartile 25 <sup>th</sup> - quartile 75 <sup>th</sup> ) or N (%). Difference is mean difference with (95% CI) for binomial variables and median difference with (95% CI) for continuous variables<br>Abbreviations: CI is confidence interval. |                   |                   |                        |         |

237

## 238 Identification of Subphenotypes

239 After comparing the clinical characteristics of the clusters, each cluster was assigned to  
 240 represent a distinct subphenotype of ARDS, with patients in cluster 1 assigned to  
 241 subphenotype A, and patients in cluster 2 assigned to subphenotype B. Using blood  
 242 biomarker information available for a subset of patients from both ARMA and ALVEOLI,  
 243 subphenotype B showed increased levels of pro-inflammatory markers when compared  
 244 to subphenotype A (**Figure 2** and **eTables 8 and 9**).

245

## 246 **DISCUSSION**

247 This study successfully demonstrated that nine easily obtainable clinical variables can  
248 identify two distinct ARDS subphenotypes with different clinical and biologic  
249 characteristics as well as outcomes across the test and validation cohorts. There was  
250 good generalizability amongst diverse populations from multiple validation datasets with  
251 temporal and geographical differences.

252 It is understandable that researchers feel compelled to use as much information  
253 as possible to build robust models. This is supportable for two main reasons: (1) the well-  
254 known heterogeneity of complex syndromes such as ARDS and (2) the abundance of  
255 highly granular clinical data generated by electronic health records (EHRs). It is  
256 anticipated that analyzing this vast amount of data will provide new knowledge regarding  
257 disease mechanisms by enabling researchers to find plausible hidden patterns within the  
258 data [29]. However, this data-heavy approach has the potential drawback of using  
259 predictors which are not generally obtained in a time window prior to intervention, or worse  
260 yet, using variables that are not part of the routine standard of care for patients. The  
261 rationale of using fewer and easy to collect clinical variables is not new in the field of  
262 critical care. Prognostic models have already shown that it is indeed feasible to create  
263 meaningful models using fewer predictors [30,31].

264 Our initial choices to define variables commonly found in the EHR at ARDS  
265 diagnosis was inspired by a recent report from the World Health Organization (WHO)  
266 which showed an enormous discrepancy of medical devices availability in a survey across  
267 135 countries [29]. Recognizing this inconsistency is essential for widespread  
268 implementation of machine learning models regardless of varying availability of resources

1  
2  
3 269 across countries and health systems [29]. The aim is to provide clinically relevant  
4  
5 270 information within a defined and short time period that might impact the delivery of  
6  
7 271 effective interventions to the right patient population and to as many patients as possible  
8  
9  
10 272 [29].

11  
12 273 Recently, Sinha *et al.* developed supervised-learning gradient boosted classifier  
13  
14 274 models trained using 24 or 14 readily available clinical data elements to reproduce  
15  
16 275 biomarker-derived subphenotypes which were previously identified by Calfee *et al.* [17].  
17  
18 276 Unlike Sinha *et al.*, who predicted previously identified subphenotypes, our study has  
19  
20 277 identified two subphenotypes *de novo* using a small set of clinical variables.  
21  
22

23  
24 278 Although the subphenotypes that we have identified and those that have been  
25  
26 279 previously published look similar, our work is distinct from previous studies in several  
27  
28 280 ways. We employed different training and validation datasets and also utilized a different  
29  
30 281 and well-established unsupervised learning technique. Moreover, we utilized a process  
31  
32 282 for selecting predictors which is not comparable to previous studies. Acknowledging these  
33  
34 283 differences is crucial. It would not be unexpected to assume that these deviations would  
35  
36 284 be relevant enough to produce different subphenotypes [32]. However, the clinical,  
37  
38 285 laboratory characteristics, and the clinical outcomes of our subphenotypes show that they  
39  
40 286 are remarkably similar to subphenotypes found in previous papers, regardless of  
41  
42 287 methodological differences.  
43  
44  
45

46  
47 288 At this point it is not possible to go beyond this comparative analysis, as there is  
48  
49 289 no gold standard definition of ARDS subphenotypes [32]. Nonetheless, our work does  
50  
51 290 provide robust evidence that ARDS does indeed have two subphenotypes that can be  
52  
53 291 systematically identified, despite major differences in population assessed and  
54  
55  
56  
57  
58  
59

1  
2  
3 292 methodological approach used compared with previous studies. It also reinforces that we  
4  
5 293 should continue to explore the underlying biological pathways of such subphenotypes to  
6  
7 294 find responders to new or previously tested therapies.  
8  
9

10 295 Our study has several strengths. First, it is the largest cohort of patients that has  
11  
12 296 been studied to develop distinct subphenotypes of ARDS patients. Moreover, our  
13  
14 297 validation cohort included patients from the ART trial, allowing us to validate our model in  
15  
16 298 the contemporaneous population of a large international randomized clinical trial in  
17  
18 299 addition to the ARDSnet studies used in other subphenotyping studies. Second, our  
19  
20 300 subphenotyping model was developed exclusively on the training set and then validated  
21  
22 301 across multiple separate datasets. Nevertheless, similar separation in mortality was seen  
23  
24 302 between the two subphenotypes across all trials. Third, we used the K-means algorithm  
25  
26 303 to identify our subphenotypes, and the results obtained with this technique can be easily  
27  
28 304 interpreted by clinicians and implemented in clinical practice. Lastly, this is the first  
29  
30 305 phenotyping study that has used easily available clinical variables to identify ARDS  
31  
32 306 phenotypes *de novo*, which allows for early identification of these patients in the clinical  
33  
34 307 care at the bedside. Using this algorithm with a small number of routinely collected  
35  
36 308 variables could enable our model to be applied in trials that either retrospectively or  
37  
38 309 prospectively assess interventions targeted to each subphenotype. Future work should  
39  
40 310 analyze previous trials to identify possible differential treatment response for the  
41  
42 311 subphenotypes of ARDS patients identified in this study.  
43  
44  
45  
46  
47  
48

49 312 This study also has limitations. First, we have developed our models exclusively  
50  
51 313 on patients enrolled in clinical trials. Due to the strict inclusion and exclusion criteria of  
52  
53 314 these clinical trials, the generalizability of these results needs to be evaluated in  
54  
55  
56  
57  
58  
59  
60

1  
2  
3 315 unselected ARDS populations. Although there are clear clinical and biomarker differences  
4  
5 316 between the identified subphenotypes, the model's clinical utility needs to be  
6  
7 317 prospectively validated and further investigated. Additionally, our biomarker analysis is  
8  
9 318 limited to those patients in which the data was made publicly available by the study  
10  
11 319 authors. Lastly, K-means clustering does not handle missing data, and no approach was  
12  
13 320 used to impute missing values. However, the extremely low rate of missingness in our  
14  
15 321 study makes this issue less relevant.  
16  
17  
18  
19  
20  
21  
22  
23  
24  
25  
26  
27  
28  
29  
30  
31  
32  
33  
34  
35  
36  
37  
38  
39  
40  
41  
42  
43  
44  
45  
46  
47  
48  
49  
50  
51  
52  
53  
54  
55  
56  
57  
58  
59  
60



1  
2  
3 323 **CONCLUSIONS**  
4

5 324 This study confirms the existence of two distinct subphenotypes in ARDS patients using  
6  
7 325 a novel clustering model on routinely collected clinical data. This work may allow for easier  
8  
9  
10 326 identification of ARDS subphenotypes to facilitate implementation of precision clinical trial  
11  
12 327 enrollment and development of targeted therapies in a variety of settings without the  
13  
14  
15 328 added burdens of biomarker evaluation.  
16

17 329  
18  
19  
20  
21  
22  
23  
24  
25  
26  
27  
28  
29  
30  
31  
32  
33  
34  
35  
36  
37  
38  
39  
40  
41  
42  
43  
44  
45  
46  
47  
48  
49  
50  
51  
52  
53  
54  
55  
56  
57  
58  
59  
60

1  
2  
3 330 **DECLARATIONS**  
4

5 331 **Funding:** This research received no specific grant from any funding agency in the public,  
6  
7  
8 332 commercial or not-for-profit sectors.

9  
10 333 **Competing Interest:** AD, MS, FGZ, ABC, ISM, DMP, LNL declare no relevant financial  
11  
12 334 conflicts of interest. RK, EVA, LB, JO, DR and ROD are employees of Endpoint Health,  
13  
14 335 Inc. ASN reported receiving personal fees from Dräger unrelated to the submitted work.

15  
16  
17 336 **Ethics Approval:** All patients provided informed consent in the original trials. This  
18  
19 337 secondary analysis study was exempt from IRB review because it does not meet the  
20  
21 338 definition of human subject as defined in 45 CFR 46.102. WIRB Work Order #1-1228617-  
22  
23  
24 339 1

25  
26 340 **Availability of data and material:** Data from the ARDSnet studies (EDEN, FACTT,  
27  
28 341 ARMA, ALVEOLI) is publicly available from the NHLBI ARDS Network (NHLBI ARDS  
29  
30 342 Network) and data from the ART trial can be requested from study authors.

31  
32  
33 343 **Author Contributions:** AD, RK, EVA, LB participated in study design and analysis,  
34  
35 344 drafted, and revised the manuscript, and are the guarantor of the document. MS, DR,  
36  
37 345 JO, FGZ, ABC, ISM, DMP, LNL, and ASN participated in interpretation of data analysis,  
38  
39 346 drafted the manuscript, and revised it for critically important intellectual content. ROD  
40  
41 347 participated in the study design, analysis, interpretation of data analysis, and final  
42  
43 348 revision of the manuscript content.

44  
45  
46  
47 349 **Twitter:** @AbhiduggalMD, @msiuba, @f\_g\_zampieri, @rod\_deliberato, @a\_serpaneto,  
48  
49 350 @l\_bulgarelli, @endpointhealth

## 352 REFERENCES

- 353 1 ARDS Definition Task Force, Ranieri VM, Rubenfeld GD, *et al.* Acute respiratory  
354 distress syndrome: the Berlin Definition. *JAMA* 2012;**307**:2526–33.  
355 doi:10.1001/jama.2012.5669
- 356 2 Thille AW, Esteban A, Fernández-Segoviano P, *et al.* Comparison of the Berlin  
357 Definition for Acute Respiratory Distress Syndrome with Autopsy. *Am J Respir Crit  
358 Care Med* 2013;**187**:761–7. doi:10.1164/rccm.201211-1981OC
- 359 3 Reilly J, Calfee C, Christie J. Acute Respiratory Distress Syndrome Phenotypes.  
360 *Semin Respir Crit Care Med* 2019;**40**:019–30. doi:10.1055/s-0039-1684049
- 361 4 Reddy K, Sinha P, O’Kane CM, *et al.* Subphenotypes in critical care: translation into  
362 clinical practice. *The Lancet Respiratory Medicine* 2020;**8**:631–43.  
363 doi:10.1016/S2213-2600(20)30124-7
- 364 5 Shankar-Hari M, Fan E, Ferguson ND. Acute respiratory distress syndrome (ARDS)  
365 phenotyping. *Intensive Care Med* 2019;**45**:516–9. doi:10.1007/s00134-018-5480-6
- 366 6 Calfee CS, Delucchi K, Parsons PE, *et al.* Subphenotypes in acute respiratory  
367 distress syndrome: latent class analysis of data from two randomised controlled  
368 trials. *The Lancet Respiratory Medicine* 2014;**2**:611–20. doi:10.1016/S2213-  
369 2600(14)70097-9
- 370 7 Famous KR, Delucchi K, Ware LB, *et al.* Acute Respiratory Distress Syndrome  
371 Subphenotypes Respond Differently to Randomized Fluid Management Strategy.  
372 *Am J Respir Crit Care Med* 2017;**195**:331–8. doi:10.1164/rccm.201603-0645OC
- 373 8 Calfee CS, Delucchi KL, Sinha P, *et al.* Acute respiratory distress syndrome  
374 subphenotypes and differential response to simvastatin: secondary analysis of a  
375 randomised controlled trial. *The Lancet Respiratory Medicine* 2018;**6**:691–8.  
376 doi:10.1016/S2213-2600(18)30177-2
- 377 9 for the NHLBI ARDS Network, Sinha P, Delucchi KL, *et al.* Latent class analysis of  
378 ARDS subphenotypes: a secondary analysis of the statins for acutely injured lungs  
379 from sepsis (SAILS) study. *Intensive Care Med* 2018;**44**:1859–69.  
380 doi:10.1007/s00134-018-5378-3
- 381 10 Bos LD, Schouten LR, van Vught LA, *et al.* Identification and validation of distinct  
382 biological phenotypes in patients with acute respiratory distress syndrome by cluster  
383 analysis. *Thorax* 2017;**72**:876–83. doi:10.1136/thoraxjnl-2016-209719
- 384 11 Ferguson ND, Fan E, Camporota L, *et al.* The Berlin definition of ARDS: an  
385 expanded rationale, justification, and supplementary material. *Intensive Care Med*  
386 2012;**38**:1573–82. doi:10.1007/s00134-012-2682-1

- 1  
2  
3 387 12 Bellani G, Laffey JG, Pham T, *et al*. Epidemiology, Patterns of Care, and Mortality  
4 388 for Patients With Acute Respiratory Distress Syndrome in Intensive Care Units in 50  
5 389 Countries. *JAMA* 2016;**315**:788. doi:10.1001/jama.2016.0291  
6  
7  
8 390 13 Gattinoni L, Vassalli F, Romitti F. Benefits and risks of the P/F approach. *Intensive*  
9 391 *Care Med* 2018;**44**:2245–7. doi:10.1007/s00134-018-5413-4  
10  
11 392 14 Matthay MA, Arabi YM, Siegel ER, *et al*. Phenotypes and personalized medicine in  
12 393 the acute respiratory distress syndrome. *Intensive Care Med* 2020;**46**:2136–52.  
13 394 doi:10.1007/s00134-020-06296-9  
14  
15 395 15 Shankar-Hari M, Rubenfeld GD. Population enrichment for critical care trials:  
16 396 phenotypes and differential outcomes. *Current Opinion in Critical Care*  
17 397 2019;**25**:489–97. doi:10.1097/MCC.0000000000000641  
18  
19  
20 398 16 Sinha P, Delucchi KL, McAuley DF, *et al*. Development and validation of  
21 399 parsimonious algorithms to classify acute respiratory distress syndrome phenotypes:  
22 400 a secondary analysis of randomised controlled trials. *The Lancet Respiratory*  
23 401 *Medicine* 2020;**8**:247–57. doi:10.1016/S2213-2600(19)30369-8  
24  
25 402 17 Sinha P, Churpek MM, Calfee CS. Machine Learning Classifier Models Can Identify  
26 403 Acute Respiratory Distress Syndrome Phenotypes Using Readily Available Clinical  
27 404 Data. *Am J Respir Crit Care Med* 2020;**202**:996–1004. doi:10.1164/rccm.202002-  
28 405 0347OC  
29  
30  
31 406 18 Kitsios GD, Yang L, Manatakis DV, *et al*. Host-Response Subphenotypes Offer  
32 407 Prognostic Enrichment in Patients With or at Risk for Acute Respiratory Distress  
33 408 Syndrome\*: *Critical Care Medicine* 2019;**47**:1724–34.  
34 409 doi:10.1097/CCM.0000000000004018  
35  
36  
37 410 19 The National Heart, Lung, and Blood Institute Acute Respiratory Distress Syndrome  
38 411 (ARDS) Clinical Trials Network. Ventilation with Lower Tidal Volumes as Compared  
39 412 with Traditional Tidal Volumes for Acute Lung Injury and the Acute Respiratory  
40 413 Distress Syndrome. *N Engl J Med* 2000;**342**:1301–8.  
41 414 doi:10.1056/NEJM200005043421801  
42  
43 415 20 The National Heart, Lung, and Blood Institute Acute Respiratory Distress Syndrome  
44 416 (ARDS) Clinical Trials Network. Higher versus Lower Positive End-Expiratory  
45 417 Pressures in Patients with the Acute Respiratory Distress Syndrome. *N Engl J Med*  
46 418 2004;**351**:327–36. doi:10.1056/NEJMoa032193  
47  
48  
49 419 21 The National Heart, Lung, and Blood Institute Acute Respiratory Distress Syndrome  
50 420 (ARDS) Clinical Trials Network. Pulmonary-Artery versus Central Venous Catheter  
51 421 to Guide Treatment of Acute Lung Injury. *N Engl J Med* 2006;**354**:2213–24.  
52 422 doi:10.1056/NEJMoa061895  
53  
54 423 22 The National Heart, Lung, and Blood Institute Acute Respiratory Distress Syndrome  
55 424 (ARDS) Clinical Trials Network, Rice TW, Wheeler AP, *et al*. Initial Trophic vs Full  
56  
57  
58  
59  
60

- 1  
2  
3 425 Enteral Feeding in Patients With Acute Lung Injury: The EDEN Randomized Trial.  
4 426 *JAMA: The Journal of the American Medical Association* 2012;**307**:795–803.  
5 427 doi:10.1001/jama.2012.137  
6  
7  
8 428 23 The National Heart, Lung, and Blood Institute ARDS Clinical Trials Network.  
9 429 Rosuvastatin for Sepsis-Associated Acute Respiratory Distress Syndrome. *N Engl J*  
10 430 *Med* 2014;**370**:2191–200. doi:10.1056/NEJMoa1401520  
11  
12 431 24 Writing Group for the Alveolar Recruitment for Acute Respiratory Distress Syndrome  
13 432 Trial (ART) Investigators, Cavalcanti AB, Suzumura ÉA, *et al.* Effect of Lung  
14 433 Recruitment and Titrated Positive End-Expiratory Pressure (PEEP) vs Low PEEP on  
15 434 Mortality in Patients With Acute Respiratory Distress Syndrome: A Randomized  
16 435 Clinical Trial. *JAMA* 2017;**318**:1335. doi:10.1001/jama.2017.14171  
17  
18  
19 436 25 Yehya N, Harhay MO, Curley MAQ, *et al.* Reappraisal of Ventilator-Free Days in  
20 437 Critical Care Research. *Am J Respir Crit Care Med* 2019;**200**:828–36.  
21 438 doi:10.1164/rccm.201810-2050CP  
22  
23 439 26 Castela Forte J, Perner A, van der Horst ICC. The use of clustering algorithms in  
24 440 critical care research to unravel patient heterogeneity. *Intensive Care Med*  
25 441 2019;**45**:1025–8. doi:10.1007/s00134-019-05631-z  
26  
27  
28 442 27 Ketchen DJ, Shook CL. The Application of Cluster Analysis in Strategic  
29 443 Management Research: An Analysis and Critique. *Strategic Management Journal*  
30 444 1996;**17**:441–58. doi:https://doi.org/10.1002/(SICI)1097-  
31 445 0266(199606)17:6<441::AID-SMJ819>3.0.CO;2-G  
32  
33 446 28 Caliński T, Harabasz J. A dendrite method for cluster analysis. *Communications in*  
34 447 *Statistics* 1974;**3**:1–27. doi:10.1080/03610927408827101  
35  
36  
37 448 29 Bulgarelli L, Deliberato RO, Johnson AEW. Prediction on critically ill patients: The  
38 449 role of “big data.” *Journal of Critical Care* 2020;**60**:64–8.  
39 450 doi:10.1016/j.jcrc.2020.07.017  
40  
41 451 30 Johnson AEW, Kramer AA, Clifford GD. A New Severity of Illness Scale Using a  
42 452 Subset of Acute Physiology and Chronic Health Evaluation Data Elements Shows  
43 453 Comparable Predictive Accuracy\*: *Critical Care Medicine* 2013;**41**:1711–8.  
44 454 doi:10.1097/CCM.0b013e31828a24fe  
45  
46  
47 455 31 Deliberato RO, Escudero GG, Bulgarelli L, *et al.* SEVERITAS: An externally  
48 456 validated mortality prediction for critically ill patients in low and middle-income  
49 457 countries. *International Journal of Medical Informatics* 2019;**131**:103959.  
50 458 doi:10.1016/j.ijmedinf.2019.103959  
51  
52 459 32 DeMerle KM, Angus DC, Baillie JK, *et al.* Sepsis Subclasses: A Framework for  
53 460 Development and Interpretation. *Crit Care Med* Published Online First: 15 February  
54 461 2021. doi:10.1097/CCM.0000000000004842  
55  
56  
57  
58  
59  
60

1  
2  
3 462 **FIGURES LEGENDS**  
4

5 463 **Figure 1 - Differences of the Variables Included in the Cluster Algorithm Among**  
6  
7  
8 464 **Clusters**  
9

10 465 Square symbols represent the study with the highest mean z score for each phenotype;  
11  
12 466 Circles represent the study with the lowest mean z score for each phenotype. The colored  
13  
14 467 bands are exclusively to help visualize the opposite trends of the variables on the different  
15  
16  
17 468 clusters; Art.pH: arterial pH; Bicarb: bicarbonate; MAP: mean arterial pressure; Creat:  
18  
19 469 creatinine; Resp.Rate: respiratory rate  
20

21 470 **Figure 2 - Heat Map of the Biomarkers Available for the ARMA and ALVEOLI Trials**  
22

23  
24 471 For better visualization and due to difference in scales, the values were log-normalized  
25  
26 472 and z-scored. Subphenotypes A and B are shown separately to highlight their differences.  
27  
28  
29  
30  
31  
32  
33  
34  
35  
36  
37  
38  
39  
40  
41  
42  
43  
44  
45  
46  
47  
48  
49  
50  
51  
52  
53  
54  
55  
56  
57  
58  
59  
60

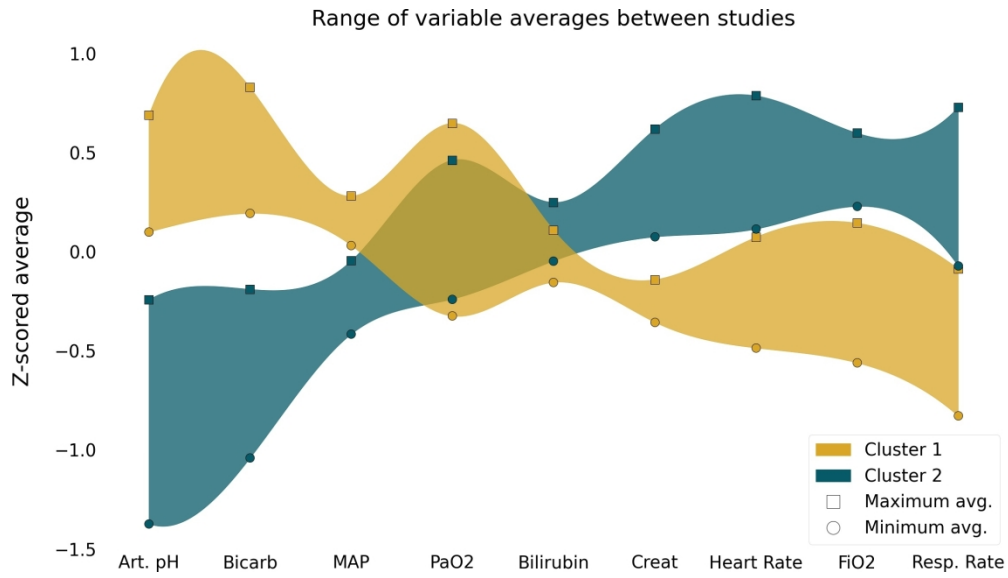

Figure 1 - Differences of the Variables Included in the Cluster Algorithm Among Clusters

812x457mm (72 x 72 DPI)

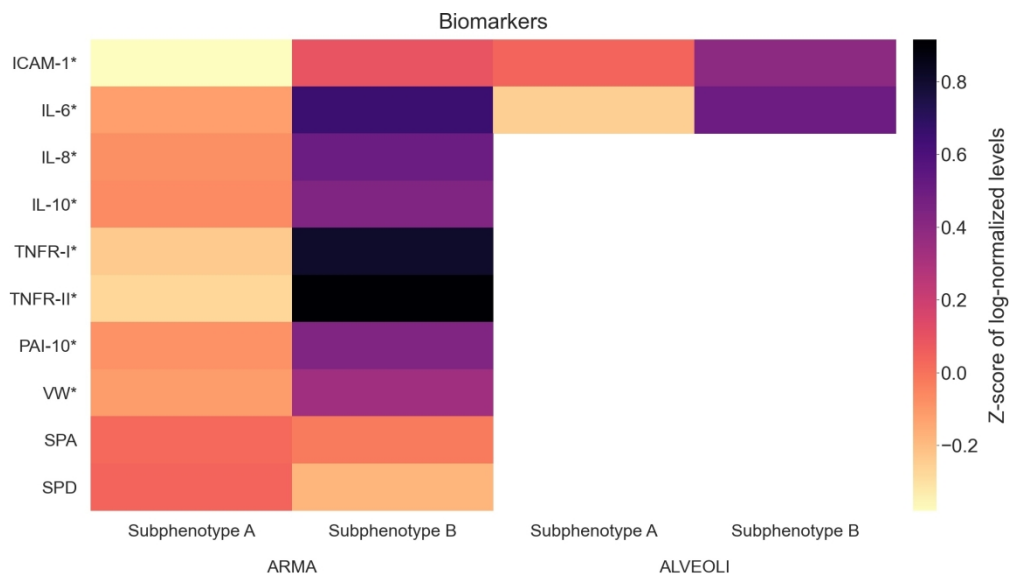

Figure 2 - Heat Map of the Biomarkers Available for the ARMA and ALVEOLI Trials

812x457mm (72 x 72 DPI)



1  
2  
3  
4  
5  
6 **Identification of Acute Respiratory Distress Syndrome**  
7 **subphenotypes denovo using routine clinical data: a**  
8 **retrospective analysis of ARDS clinical trials**  
9  
10  
11  
12  
13  
14  
15  
16  
17  
18  
19  
20  
21  
22  
23  
24  
25  
26  
27  
28  
29  
30  
31  
32  
33  
34  
35  
36  
37  
38  
39  
40  
41  
42  
43  
44  
45  
46  
47  
48  
49  
50  
51  
52  
53  
54  
55  
56  
57  
58  
59  
60

ONLINE SUPPLEMENT

## Additional Methods

### *Number of clusters*

The optimal number of clusters was chosen according to two criteria: (1) Elbow method, by selecting a number of clusters that if further increased will result in only a small increase in performance and possibly cause overfit, hence this number is commonly referenced as to being in the “elbow” of the curve (**eFigure 1**); and (2) Calinski-Harabasz index, consisting of the ratio of *within* to *between* cluster dispersion; higher scores are indication of dense and well separated clusters (**e-Figure 1**).

### *Ventilator-free days*

Ventilator free days for ALVEOLI, EDEN, FACTT, and SAILS were calculated according to the methods outlined by Yehya et al (1). Briefly, patients who died at any time in the 28 days were assigned 0 ventilator-free days. For survivors, the number of ventilator-free days was calculated based on the date of the final successful extubation; reintubations before the final extubation were not counted toward ventilator-free days. All days after a patient was discharged home up to the 28<sup>th</sup> day with unassisted breathing were assumed to be ventilator-free days.

**eTable 1 - Percentage of missing data in the routinely collected variables, closest randomization, on EDEN and FACTT trials.**

|                                  | <b>EDEN<br/>(n = 1000)</b> | <b>FACTT<br/>(n = 999)</b> |
|----------------------------------|----------------------------|----------------------------|
| Age                              | 0.0                        | 0.0                        |
| Gender                           | 0.0                        | 0.0                        |
| Arterial pH                      | 2.8                        | 3.9                        |
| Bicarbonate                      | 0.2                        | 1.5                        |
| Bilirubin                        | 8.1                        | 26.8                       |
| Creatinine                       | 0.0                        | 0.0                        |
| FiO <sub>2</sub>                 | 0.8                        | 0.6                        |
| Heart Rate                       | 0.0                        | 0.1                        |
| Height                           | 0.1                        | 0.9                        |
| Mean Arterial Pressure           | 12.1                       | 0.8                        |
| PaCO <sub>2</sub>                | 2.8                        | 3.9                        |
| PaO <sub>2</sub>                 | 0.2                        | 4.0                        |
| Positive end-expiratory pressure | 1.0                        | 0.3                        |
| Platelets                        | 8.1                        | 6.0                        |
| Plateau pressure                 | 32.3                       | 30.9                       |
| Respiratory rate                 | 0.6                        | 0.4                        |
| Tidal volume                     | 15.3                       | 12.1                       |
| Tidal volume per PBW             | 15.4                       | 12.8                       |

**eTable 2 - Plausible physiological ranges for clinical measurements, closest to time of randomization**

| Variables                          | Lower Limit | Upper Limit |
|------------------------------------|-------------|-------------|
| Age (years)                        | 16          | 89          |
| Arterial pH                        | 6.65        | 7.80        |
| Bicarbonate (mEq/L)                | 1           | 50          |
| Bilirubin (mg/dL)                  | 0.1         | 50          |
| Creatinine (mg/dL)                 | 0.1         | 20          |
| FiO2                               | 0.21        | 1           |
| Heart Rate (beats per minute)      | 20          | 300         |
| Height (cm)                        | 120         | 220         |
| Mean arterial pressure (mmHg)      | 10          | 400         |
| PaCO2 (mmHg)                       | 20          | 120         |
| PaO2 / FiO2                        | 0           | 500         |
| PaO2 (mmHg)                        | 30          | 500         |
| PEEP (cm H2O)                      | 0           | 60          |
| Platelets (thousands)              | 1           | 1000        |
| Plateau Pressure (cm H2O)          | 10          | 50          |
| Respiratory Rate (resp per minute) | 1           | 100         |
| Tidal Volume (cm H2O)              | 100         | 1400        |

**eTable 3 - Correlation among fifteen routinely collected variables, close to the time of randomization.**

|                     | Age   | pH    | HCO <sub>3</sub> | Bili  | Creat | FiO <sub>2</sub> | Gender | HR    | MAP   | PaCO <sub>2</sub> | PaO <sub>2</sub> | PEEP  | Plat  | RR    | V <sub>T</sub> /PBW |
|---------------------|-------|-------|------------------|-------|-------|------------------|--------|-------|-------|-------------------|------------------|-------|-------|-------|---------------------|
| Age                 | 1.00  | 0.06  | -0.04            | -0.02 | 0.11  | -0.13            | 0.00   | -0.27 | -0.12 | -0.11             | -0.06            | -0.22 | 0.00  | -0.11 | 0.03                |
| pH                  | 0.06  | 1.00  | 0.40             | -0.04 | -0.16 | -0.26            | -0.01  | -0.18 | 0.15  | -0.39             | 0.00             | -0.20 | 0.05  | -0.21 | 0.07                |
| HCO <sub>3</sub>    | -0.04 | 0.40  | 1.00             | -0.08 | -0.28 | -0.05            | -0.02  | -0.18 | 0.08  | 0.44              | 0.02             | -0.05 | 0.15  | -0.24 | -0.07               |
| Bili                | -0.02 | -0.04 | -0.08            | 1.00  | 0.06  | -0.03            | -0.04  | 0.01  | -0.04 | -0.01             | 0.03             | 0.01  | -0.20 | 0.04  | -0.01               |
| Creat               | 0.11  | -0.16 | -0.28            | 0.06  | 1.00  | -0.04            | -0.08  | -0.04 | -0.01 | -0.14             | 0.00             | -0.06 | -0.12 | 0.02  | 0.00                |
| FiO <sub>2</sub>    | -0.13 | -0.26 | -0.05            | -0.03 | -0.04 | 1.00             | 0.03   | 0.13  | -0.06 | 0.18              | 0.11             | 0.49  | 0.06  | 0.21  | -0.02               |
| Gender              | 0.00  | -0.01 | -0.02            | -0.04 | -0.08 | 0.03             | 1.00   | -0.03 | -0.05 | -0.04             | -0.06            | 0.02  | 0.09  | 0.09  | 0.19                |
| HR                  | -0.27 | -0.18 | -0.18            | 0.01  | -0.04 | 0.13             | -0.03  | 1.00  | -0.02 | 0.03              | -0.04            | 0.12  | -0.05 | 0.22  | 0.08                |
| MAP                 | -0.12 | 0.15  | 0.08             | -0.04 | -0.01 | -0.06            | -0.05  | -0.02 | 1.00  | -0.03             | 0.01             | -0.01 | 0.06  | -0.04 | 0.00                |
| PaCO <sub>2</sub>   | -0.11 | -0.39 | 0.44             | -0.01 | -0.14 | 0.18             | -0.04  | 0.03  | -0.03 | 1.00              | -0.04            | 0.17  | 0.11  | -0.05 | -0.17               |
| PaO <sub>2</sub>    | -0.06 | 0.00  | 0.02             | 0.03  | 0.00  | 0.11             | -0.06  | -0.04 | 0.01  | -0.04             | 1.00             | -0.09 | -0.04 | -0.09 | 0.03                |
| PEEP                | -0.22 | -0.20 | -0.05            | 0.01  | -0.06 | 0.49             | 0.02   | 0.12  | -0.01 | 0.17              | -0.09            | 1.00  | 0.00  | 0.33  | -0.15               |
| Plat                | 0.00  | 0.05  | 0.15             | -0.20 | -0.12 | 0.06             | 0.09   | -0.05 | 0.06  | 0.11              | -0.04            | 0.00  | 1.00  | -0.05 | 0.03                |
| RR                  | -0.11 | -0.21 | -0.24            | 0.04  | 0.02  | 0.21             | 0.09   | 0.22  | -0.04 | -0.05             | -0.09            | 0.33  | -0.05 | 1.00  | -0.31               |
| V <sub>T</sub> /PBW | 0.03  | 0.07  | -0.07            | -0.01 | 0.00  | -0.02            | 0.19   | 0.08  | 0.00  | -0.17             | 0.03             | -0.15 | 0.03  | -0.31 | 1.00                |

Data are Pearson correlation coefficients.

Abbreviations: Bili denotes bilirubin, Creat is creatinine, HR is heart rate, MAP is mean arterial pressure, PEEP is positive end-expiratory pressure, Plat is platelets, RR is respiratory rate and V<sub>T</sub>/PBW is tidal volume per predicted body weight.

**eTable 4 - List of variables in each model assessed**

| Model | Demographics |        | Arterial Blood Gases |                  |                   | Laboratory Values |      |                  |      | Vital Signs |    |    | Ventilator Variables |      |                     |
|-------|--------------|--------|----------------------|------------------|-------------------|-------------------|------|------------------|------|-------------|----|----|----------------------|------|---------------------|
|       | Age          | Gender | pH                   | PaO <sub>2</sub> | PaCO <sub>2</sub> | Creat             | Bili | HCO <sub>3</sub> | Plat | MAP         | RR | HR | FiO <sub>2</sub>     | PEEP | V <sub>T</sub> /PBW |
| 1     | X            | X      | X                    | X                | X                 | X                 | X    | X                | X    | X           | X  | X  | X                    | X    | X                   |
| 2     |              |        | X                    | X                | X                 | X                 | X    | X                | X    | X           | X  | X  | X                    | X    | X                   |
| 3     | X            | X      | X                    | X                | X                 | X                 | X    | X                |      | X           | X  | X  | X                    |      |                     |
| 4     | X            | X      | X                    | X                |                   | X                 | X    | X                |      | X           | X  | X  | X                    |      |                     |
| 5     |              |        | X                    | X                | X                 | X                 | X    | X                | X    | X           | X  | X  | X                    |      |                     |
| 6     | X            | X      | X                    | X                |                   | X                 |      | X                |      | X           | X  | X  | X                    |      |                     |
| 7     |              |        | X                    | X                | X                 | X                 | X    | X                |      | X           | X  | X  | X                    |      |                     |
| 8     |              |        | X                    | X                |                   | X                 | X    | X                |      | X           | X  | X  | X                    |      |                     |
| 9     |              |        | X                    | X                | X                 |                   |      | X                |      | X           | X  | X  |                      |      |                     |
| 10    | X            | X      |                      |                  |                   |                   |      |                  |      | X           | X  | X  |                      |      |                     |

Abbreviations: Bili denotes bilirubin, Creat is creatinine, HR is heart rate, MAP is mean arterial pressure, PEEP is positive end-expiratory pressure, Plat is platelets, RR is respiratory rate and V<sub>T</sub>/PBW is tidal volume per predicted body weight.

**eTable 5 - Baseline Characteristics and Clinical Outcomes According to the Clusters and Trials in the Training Set**

|                                            | FACTT                  |                        |         | EDEN                   |                        |         |
|--------------------------------------------|------------------------|------------------------|---------|------------------------|------------------------|---------|
|                                            | Cluster 1<br>(n = 407) | Cluster 2<br>(n = 294) | p value | Cluster 1<br>(n = 449) | Cluster 2<br>(n = 328) | p value |
| Age, year*                                 | 50.0 (40.0 - 63.0)     | 47.0 (36.0 - 58.0)     | 0.002   | 53.0 (44.0 - 63.0)     | 51.0 (41.0 - 62.2)     | 0.183   |
| Male gender - no. (%)                      | 223 (54.8)             | 151 (51.4)             | 0.411   | 233 (51.9)             | 168 (51.2)             | 0.910   |
| Body mass index, kg/m <sup>2</sup>         | 27.5 (23.3 - 32.1)     | 27.4 (23.0 - 32.7)     | 0.938   | 29.1 (24.6 - 34.5)     | 28.5 (23.4 - 35.1)     | 0.476   |
| Caucasian - no. (%)                        | 269 (66.1)             | 177 (60.2)             | 0.129   | 349 (81.5)             | 237 (75.7)             | 0.067   |
| Etiology - no. (%)                         |                        |                        | < 0.001 |                        |                        | 0.003   |
| Pneumonia                                  | 201 (49.4)             | 139 (47.3)             |         | 296 (65.9)             | 217 (66.2)             |         |
| Sepsis                                     | 78 (19.2)              | 101 (34.4)             |         | 50 (11.1)              | 60 (18.3)              |         |
| Aspiration                                 | 67 (16.5)              | 30 (10.2)              |         | 45 (10.0)              | 27 (8.2)               |         |
| Trauma                                     | 24 (5.9)               | 8 (2.7)                |         | 24 (5.3)               | 5 (1.5)                |         |
| Other                                      | 37 (9.1)               | 16 (5.4)               |         | 34 (7.6)               | 19 (5.8)               |         |
| Prognostic scores                          |                        |                        |         |                        |                        |         |
| APACHE III                                 | 69.0 (56.0 - 84.0)     | 91 (76.0 - 105.0)      | < 0.001 | 66.0 (54.0 - 79.0)     | 84.0 (71.0 - 100.2)    | < 0.001 |
| Use of vasopressor - no. (%)               | 118 (29.5)             | 189 (64.9)             | < 0.001 | 187 (41.6)             | 209 (63.7)             | < 0.001 |
| Vital signs                                |                        |                        |         |                        |                        |         |
| Temperature, °C                            | 37.5 (36.8 - 38.2)     | 37.6 (37.0 - 38.4)     | 0.371   | 37.3 (36.8 - 37.8)     | 37.3 (36.7 - 38.1)     | 0.212   |
| Heart rate, bpm                            | 95.0 (81.0 - 110.0)    | 114 (102 - 126)        | < 0.001 | 89 (77 - 102)          | 101 (89 - 116)         | < 0.001 |
| Mean arterial Pressure, mmHg               | 76.0 (68.0 - 88.0)     | 71.0 (65.0 - 80.8)     | < 0.001 | 77.0 (68.0 - 84.0)     | 71.0 (66.0 - 80.0)     | < 0.001 |
| SpO <sub>2</sub> , %                       | 96 (93 - 98)           | 95 (92 - 97)           | < 0.001 | 96 (94 - 98)           | 95 (92 - 98)           | 0.032   |
| Urine output in 24 hours, mL               | 1785 (1192 - 2853)     | 1370 (842 - 2446)      | < 0.001 | 1505 (977 - 2250)      | 1165 (566 - 1816)      | < 0.001 |
| Laboratory tests                           |                        |                        |         |                        |                        |         |
| Hematocrit, %                              | 30.0 (26.0 - 33.0)     | 30.0 (24.2 - 35.0)     | 0.272   | 30.0 (26.0 - 34.0)     | 30.0 (26.0 - 35.0)     | 0.919   |
| White blood cell count, 10 <sup>9</sup> /L | 11.6 (7.3 - 16.3)      | 11.7 (5.6 - 17.9)      | 0.972   | 11.4 (7.7 - 15.5)      | 12.7 (7.7 - 19.0)      | 0.019   |
| Platelets, 10 <sup>9</sup> /L              | 195 (118.5 - 268)      | 158 (87 - 237)         | < 0.001 | 163 (108 - 241)        | 164 (103 - 227)        | 0.552   |
| Creatinine, mg/dL                          | 0.9 (0.7 - 1.3)        | 1.4 (1.0 - 2.0)        | < 0.001 | 1.0 (0.7 - 1.5)        | 1.6 (1.0 - 2.8)        | < 0.001 |
| Bilirubin, mg/dL                           | 0.7 (0.5 - 1.3)        | 0.9 (0.5 - 2.0)        | 0.003   | 0.8 (0.5 - 1.3)        | 0.8 (0.5 - 1.7)        | 0.128   |
| Arterial blood gas                         |                        |                        |         |                        |                        |         |
| pH*                                        | 7.41 (7.36 - 7.45)     | 7.29 (7.23 - 7.35)     | < 0.001 | 7.40 (7.35 - 7.44)     | 7.30 (7.24 - 7.35)     | < 0.001 |
| PaO <sub>2</sub> , mmHg                    | 78 (68 - 100)          | 78 (65 - 99)           | 0.240   | 83 (70 - 107)          | 81 (67 - 107)          | 0.416   |
| PaO <sub>2</sub> / FiO <sub>2</sub>        | 132 (92 - 173)         | 89 (65 - 126)          | < 0.001 | 133 (98 - 193)         | 101 (73 - 162)         | < 0.001 |

|   |                                      |                    |                    |         |                    |                    |         |
|---|--------------------------------------|--------------------|--------------------|---------|--------------------|--------------------|---------|
| 1 | PaCO <sub>2</sub> , mmHg             | 39 (34 - 44)       | 38.5 (33 - 47.9)   | 0.877   | 38 (34 - 44)       | 38 (33 - 46)       | 0.55    |
| 2 | Bicarbonate, mmol/L                  | 24.0 (21.0 - 27.0) | 17.0 (14.0 - 20.0) | < 0.001 | 23.0 (21.0 - 26.0) | 18.5 (15.0 - 21.0) | < 0.001 |
| 3 | Ventilatory variables                |                    |                    |         |                    |                    |         |
| 4 | Tidal volume, mL                     | 450 (400 - 530)    | 450 (382 - 500)    | 0.009   | 420 (356 - 487)    | 400 (350 - 450)    | 0.032   |
| 5 | Per PBW, mL/kg PBW                   | 7.1 (6.3 - 8.4)    | 7.0 (6.0, 8.0)     | 0.058   | 6.3 (6.0 - 7.5)    | 6.1 (6.0 - 7.3)    | 0.079   |
| 6 | Plateau pressure, cmH <sub>2</sub> O | 25.0 (20.0 - 29.0) | 28.0 (24.0 - 32.0) | < 0.001 | 23.0 (19.0 - 27.0) | 24.0 (21.0 - 28.0) | 0.004   |
| 7 | PEEP, cmH <sub>2</sub> O             | 8 (5 - 10)         | 10 (8 - 14)        | < 0.001 | 10 (5 - 10)        | 10 (8 - 14)        | < 0.001 |
| 8 | Respiratory rate, breaths/min        | 22 (18 - 27)       | 30 (24 - 35)       | < 0.001 | 22 (19 - 26)       | 30 (25 - 35)       | < 0.001 |
| 9 | FiO <sub>2</sub>                     | 0.50 (0.40 - 0.70) | 0.80 (0.60 - 1.00) | < 0.001 | 0.60 (0.45 - 0.70) | 0.80 (0.60 - 1.00) | < 0.001 |

12 Data are mean ± standard deviation, median (quartile 25<sup>th</sup> - quartile 75<sup>th</sup>) or N (%)

13 Abbreviations: APACHE denotes Acute Physiology and Chronic Health Evaluation, V<sub>T</sub>/PBW denotes tidal volume per predicted body weight.



**eTable 6 - Baseline Characteristics and Clinical Outcomes According to the Clusters and Two Trials in the Validation Set**

|                                            | ALVEOLI                |                        |         | ARMA                   |                        |         |
|--------------------------------------------|------------------------|------------------------|---------|------------------------|------------------------|---------|
|                                            | Cluster 1<br>(n = 336) | Cluster 2<br>(n = 157) | p value | Cluster 1<br>(n = 279) | Cluster 2<br>(n = 100) | p value |
| Age, year*                                 | 53.0 (39.0 - 66.2)     | 46.0 (37.0 - 60.0)     | 0.007   | 49.0 (37.0 - 64.0)     | 47.5 (36.0 - 61.0)     | 0.180   |
| Male gender - no. (%)                      | 188 (56.0)             | 86 (54.8)              | 0.883   | 169 (60.6)             | 61 (61.0)              | 0.965   |
| Body mass index, kg/m <sup>2</sup>         | 27.0 (22.9 - 31.1)     | 25.2 (21.7 - 30.2)     | 0.050   | 25.8 (23.0 - 30.2)     | 24.4 (21.5 - 29.7)     | 0.057   |
| Caucasian - no. (%)                        | 263 (78.3)             | 102 (65.0)             | 0.002   | 220 (78.9)             | 65 (65.0)              | 0.009   |
| Etiology - no. (%)                         |                        |                        | 0.001   |                        |                        | < 0.001 |
| Pneumonia                                  | 130 (38.7)             | 66 (42.0)              |         | 83 (29.7)              | 30 (30.0)              |         |
| Sepsis                                     | 63 (18.8)              | 50 (31.8)              |         | 64 (22.9)              | 43 (43.0)              |         |
| Aspiration                                 | 55 (16.4)              | 19 (12.1)              |         | 44 (15.8)              | 14 (14.0)              |         |
| Trauma                                     | 33 (9.8)               | 5 (3.2)                |         | 43 (15.4)              | 4 (4.0)                |         |
| Other                                      | 55 (16.4)              | 17 (10.8)              |         | 45 (16.1)              | 9 (9.0)                |         |
| Prognostic scores                          |                        |                        |         |                        |                        |         |
| APACHE III                                 | 71. (59.0 - 83.0)      | 93.0 (80.0 - 110.0)    | < 0.001 | 77.0 (66.0 - 90.5)     | 97.0 (81.8 (110.0)     | < 0.001 |
| Use of vasopressor - no. (%)               | 65 (20.1)              | 80 (51.3)              | < 0.001 | 77 (27.6)              | 52 (52.5)              | < 0.001 |
| Vital signs                                |                        |                        |         |                        |                        |         |
| Temperature, °C                            | 37.6 (37.1 - 38.2)     | 37.7 (36.9 - 38.3)     | 0.778   | 37.6 (37.1 - 38.1)     | 37.6 (36.8 - 38.4)     | 0.803   |
| Heart rate, bpm                            | 97.5 (83.0 - 109)      | 111.0 (97.0 - 126)     | < 0.001 | 101.0 (89.0 - 112.5)   | 118 (105.0 - 128.0)    | < 0.001 |
| Mean arterial Pressure, mmHg               | 77.3 (77.0 - 87.3)     | 73.3 (65.0 - 80.3)     | < 0.001 | 78.0 (70.7 - 88.0)     | 70.5 (64.9 - 80.4)     | < 0.001 |
| SpO <sub>2</sub> , %                       | 96 (94 - 97)           | 95 (92 - 97)           | 0.005   | 95 (93 - 98)           | 95.5 (93 - 97)         | 0.799   |
| Urine output in 24 hours, mL               | 2065 (1355 - 3255)     | 1433 (569 - 2189)      | < 0.001 | 2100 (1375 - 3096)     | 1525 (816 - 2650)      | 0.001   |
| Laboratory tests                           |                        |                        |         |                        |                        |         |
| Hematocrit, %                              | 31.0 (28.0 - 34.0)     | 31.0 (27.0 - 35.0)     | 0.617   | 30.0 (28.0 - 33.0)     | 31.0 (28.0 - 34.0)     | 0.299   |
| White blood cell count, 10 <sup>9</sup> /L | 11.7 (8.1 - 15.3)      | 10.7 (6.4 - 15.8)      | 0.166   | 11.9 (7.7 - 16.7)      | 9.8 (5.4 - 16.7)       | 0.057   |
| Platelets, 10 <sup>9</sup> /L              | 173 (94 - 266)         | 141 (57 - 214)         | 0.001   | 139 (80 - 212)         | 125 (72 - 196)         | 0.260   |
| Creatinine, mg/dL                          | 0.9 (0.7 - 1.3)        | 1.5 (0.9 - 3.0)        | < 0.001 | 1.0 (0.7 - 1.4)        | 1.8 (1.2 - 3.2)        | < 0.001 |
| Bilirubin, mg/dL                           | 0.8 (0.5 - 1.4)        | 0.9 (0.4 - 1.8)        | 0.289   | 1.0 (0.6 - 2.1)        | 1.1 (0.7 - 2.7)        | 0.106   |
| Arterial blood gas                         |                        |                        |         |                        |                        |         |
| pH*                                        | 7.42 (7.38 - 7.45)     | 7.31 (7.24 - 7.36)     | < 0.001 | 7.42 (7.38 - 7.47)     | 7.33 (7.28 - 7.37)     | < 0.001 |
| PaO <sub>2</sub> , mmHg                    | 78 (68 - 93)           | 74 (65 - 92)           | 0.082   | 75 (66 - 91)           | 81 (68 - 96)           | 0.106   |
| PaO <sub>2</sub> / FiO <sub>2</sub>        | 149 (109 - 192)        | 103 (74 - 136)         | < 0.001 | 118 (83 - 160)         | 99 (68 - 137)          | 0.006   |

|   |                                      |                    |                    |         |                    |                    |         |
|---|--------------------------------------|--------------------|--------------------|---------|--------------------|--------------------|---------|
| 1 | PaCO <sub>2</sub> , mmHg             | 38 (34 - 43)       | 36 (31 - 42)       | 0.046   | 37 (31 - 41)       | 34 (28.8 - 39.2)   | 0.003   |
| 2 | Bicarbonate, mmol/L                  | 24 (21 - 27)       | 17 (13 - 20)       | < 0.001 | 23 (20 - 26)       | 16 (13 - 19)       | < 0.001 |
| 3 | Ventilatory variables                |                    |                    |         |                    |                    |         |
| 4 | Tidal volume, mL                     | 500 (437 - 600)    | 480 (400 - 572)    | 0.002   | 700 (600 - 750)    | 700 (550 - 700)    | 0.198   |
| 5 | Per PBW, mL/kg PBW                   | 8.0 (6.9 - 9.5)    | 7.4 (6.2 - 9.2)    | 0.006   | 10.1 (9.2 - 11.1)  | 10.6 (9.0 - 11.4)  | 0.383   |
| 6 | Plateau pressure, cmH <sub>2</sub> O | 25.0 (21.0 - 30.0) | 29.0 (24.0 - 33.0) | < 0.001 | 29.0 (24.0 - 34.0) | 31.0 (27.0 - 36.0) | 0.018   |
| 7 | PEEP, cmH <sub>2</sub> O             | 10 (5 - 10)        | 10 (8 - 14)        | < 0.001 | 8 (5 - 10)         | 10 (5 - 12)        | 0.150   |
| 8 | Respiratory rate, breaths/min        | 20 (15 - 25)       | 30 (24 - 35)       | < 0.001 | 18 (14 - 21)       | 24 (18.8 - 28)     | < 0.001 |
| 9 | FiO <sub>2</sub>                     | 0.50 (0.44 - 0.65) | 0.75 (0.60 - 1.00) | < 0.001 | 0.60 (0.50 - 0.70) | 0.70 (0.59 - 0.96) | < 0.001 |

12 Data are mean ± standard deviation, median (quartile 25<sup>th</sup> - quartile 75<sup>th</sup>) or N (%)

13 Abbreviations: APACHE denotes Acute Physiology and Chronic Health Evaluation, V<sub>T</sub>/PBW denotes tidal volume per predicted body weight.

**eTable 7 - Baseline Characteristics and Clinical Outcomes According to the Clusters and Two Trials in the Validation Set**

|                                            | SAILS                  |                        |         | ART                    |                        |         |
|--------------------------------------------|------------------------|------------------------|---------|------------------------|------------------------|---------|
|                                            | Cluster 1<br>(n = 319) | Cluster 2<br>(n = 188) | p value | Cluster 1<br>(n = 211) | Cluster 2<br>(n = 298) | p value |
| Age, year*                                 | 57.0 (46.0 - 67.0)     | 53.5 (39.0 - 65.0)     | 0.035   | 54.0 (37.0 - 65.0)     | 50.0 (35.2 - 61.0)     | 0.075   |
| Male gender - no. (%)                      | 150 (47.0)             | 100 (53.2)             | 0.211   | 136 (64.5)             | 181 (60.7)             | 0.448   |
| Body mass index, kg/m <sup>2</sup>         | 28.5 (23.9 - 34.6)     | 29.8 (23.2 - 35.1)     | 0.903   | 28.8 (24.6 - 35.6)     | 28.4 (25.0 - 31.7)     | 0.367   |
| Caucasian - no. (%)                        | 250 (78.4)             | 140 (74.5)             | 0.369   | ---                    | ---                    | ---     |
| Etiology - no. (%)                         |                        |                        | 0.709   |                        |                        | 0.052   |
| Pneumonia                                  | 228 (71.5)             | 127 (67.6)             |         | 113 (53.6)             | 171 (57.4)             |         |
| Sepsis                                     | 63 (19.7)              | 39 (20.7)              |         | 38 (18.0)              | 59 (19.8)              |         |
| Aspiration                                 | 19 (6.0)               | 15 (8.0)               |         | 13 (6.2)               | 16 (5.4)               |         |
| Trauma                                     | 3 (0.9)                | 1 (0.5)                |         | 10 (4.7)               | 2 (0.7)                |         |
| Other                                      | 6 (1.9)                | 6 (3.2)                |         | 37 (17.5)              | 50 (16.8)              |         |
| Prognostic scores                          |                        |                        |         | ---                    | ---                    | ---     |
| APACHE III                                 | 70.0 (56.0 - 84.0)     | 92.0 (75.0 - 105.8)    | < 0.001 |                        |                        |         |
| SAPS III                                   | ---                    | ---                    | ---     | 62 (50 - 71)           | 66 (53 - 75)           | 0.010   |
| Use of vasopressor - no. (%)               | 150 (47.8)             | 142 (78.5)             | < 0.001 | 130 (61.6)             | 242 (81.2)             | < 0.001 |
| Vital signs                                |                        |                        |         |                        |                        |         |
| Temperature, °C                            | 37.2 (36.7 - 37.8)     | 37.3 (36.7 - 38.0)     | 0.346   | ---                    | ---                    | ---     |
| Heart rate, bpm                            | 91.0 (80.5 - 103.0)    | 102.0 (88.8 - 117.0)   | < 0.001 | 90.0 (73.0 - 103.0)    | 112.0 (97.2 - 126.0)   | < 0.001 |
| Mean arterial Pressure, mmHg               | 78.0 (69.5 - 88.0)     | 70.0 (63.0 - 78.)      | < 0.001 | 80.0 (73.5 - 89.0)     | 75.0 (70.0 - 83.0)     | < 0.001 |
| SpO <sub>2</sub> , %                       | 96 (95 - 99)           | 96 (93 - 99)           | 0.270   | ---                    | ---                    | ---     |
| Urine output in 24 hours, mL               | 1570 (852 - 2383)      | 920 (350 - 1665)       | < 0.001 | ---                    | ---                    | ---     |
| Laboratory tests                           |                        |                        |         |                        |                        |         |
| Hematocrit, %                              | 31 (27 - 35)           | 31 (28 - 37)           | 0.142   | ---                    | ---                    | ---     |
| White blood cell count, 10 <sup>9</sup> /L | 13.6 (8.5 - 18.1)      | 15.4 (9.8 - 23.3)      | 0.009   | ---                    | ---                    | ---     |
| Platelets, 10 <sup>9</sup> /L              | 164 (96 - 238)         | 131 (80 - 223)         | 0.032   | 177 (120 - 292)        | 169 (90 - 256)         | 0.048   |
| Creatinine, mg/dL                          | 1.0 (0.7 - 1.5)        | 1.4 (0.9 - 2.6)        | < 0.001 | 1.0 (0.7 - 1.5)        | 1.7 (1.0 - 2.8)        | < 0.001 |
| Bilirubin, mg/dL                           | 0.8 (0.5 - 1.4)        | 0.8 (0.5 - 1.6)        | 0.630   | 0.6 (0.4 - 1.2)        | 0.9 (0.4 - 1.7)        | 0.002   |
| Arterial blood gas                         |                        |                        |         |                        |                        |         |
| pH*                                        | 7.39 (7.35 - 7.44)     | 7.31 (7.24 - 7.35)     | < 0.001 | 7.4 (7.3 - 7.4)        | 7.2 (7.2 - 7.3)        | < 0.001 |
| PaO <sub>2</sub> , mmHg                    | 82 (68 - 101)          | 86 (72 - 111.2)        | 0.112   | 118 (82 - 158)         | 104 (78 - 152)         | 0.065   |

|    |                                      |                    |                    |         |                    |                    |         |
|----|--------------------------------------|--------------------|--------------------|---------|--------------------|--------------------|---------|
| 1  | PaO <sub>2</sub> / FiO <sub>2</sub>  | 139 (98 - 195)     | 107 (74 - 159)     | < 0.001 | 118 (82 - 158)     | 104 (78 - 152)     | 0.065   |
| 2  | PaCO <sub>2</sub> , mmHg             | 38 (34 - 45)       | 38 (32 - 44)       | 0.423   | 46 (41 - 56)       | 53 (42 - 65)       | < 0.001 |
| 3  | Bicarbonate, mmol/L                  | 23 (20 - 26)       | 17 (14 - 21)       | < 0.001 | 25.2 (22.5 - 28.8) | 20.6 (17.8 - 23.4) | < 0.001 |
| 4  | Ventilatory variables                |                    |                    |         |                    |                    |         |
| 5  | Tidal volume, mL                     | 420 (360 - 480)    | 400 (340 - 450)    | 0.016   | 360 (320 - 400)    | 350 (300 - 397.8)  | 0.008   |
| 6  | Per PBW, mL/kg PBW                   | 6.4 (6.0 - 7.3)    | 6.1 (5.9 - 7.0)    | 0.030   | 6.0 (5.3 - 6.1)    | 5.9 (5.1 - 6.1)    | 0.034   |
| 7  | Plateau pressure, cmH <sub>2</sub> O | 22.0 (18.0 - 27.0) | 25.0 (20.0 - 29.0) | 0.003   | 24.0 (21.0 - 28.0) | 27.0 (23.0 - 30.0) | < 0.001 |
| 8  | PEEP, cmH <sub>2</sub> O             | 8 (5 - 10)         | 10 (8 - 13)        | 0.001   | 10 (10 - 14)       | 12 (10 - 14)       | < 0.001 |
| 9  | Respiratory rate, breaths/min        | 23 (19 - 27)       | 30 (24 - 35)       | < 0.001 | 24 (20 - 28)       | 30 (24 - 34)       | < 0.001 |
| 10 | FiO <sub>2</sub>                     | 0.50 (0.40 - 0.60) | 0.70 (0.50 - 0.90) | < 0.001 | 0.70 (0.60 - 0.80) | 0.80 (0.70 - 1.00) | < 0.001 |

13 Data are mean ± standard deviation, median (quartile 25<sup>th</sup> - quartile 75<sup>th</sup>) or N (%)

14 Abbreviations: APACHE denotes Acute Physiology and Chronic Health Evaluation, V<sub>T</sub>/PBW denotes tidal volume per predicted body weight...

**eTable 8 - Biomarker levels by study and cluster**

|         | ARMA                        |                             |                               |         | ALVEOLI                     |                             |                               |         |
|---------|-----------------------------|-----------------------------|-------------------------------|---------|-----------------------------|-----------------------------|-------------------------------|---------|
|         | Subphenotype A<br>(n = 279) | Subphenotype B<br>(n = 100) | Median Difference<br>(95% CI) | p value | Subphenotype A<br>(n = 336) | Subphenotype B<br>(n = 157) | Median Difference<br>(95% CI) | p value |
| ICAM-1  | 654.0 (399.0 - 959.4)       | 888.0 (550.0 - 1365.3)      | 234 (60.3 to 407.8)           | 0.002   | 847.9 (585.7 - 1227.1)      | 1070.4 (748.2 - 1588.8)     | 219.4 (90.4 to 348.4)         | < 0.001 |
| IL-6    | 214.0 (91.8 - 553.5)        | 966.0 (291.0 - 2200.0)      | 749.1 (589.9 to 908.2)        | < 0.001 | 182.5 (85.5 - 435.2)        | 775.0 (148.0 - 2846.5)      | 592 (515.5 to 668.6)          | < 0.001 |
| PAI-1   | 65.3 (37.8 - 109.5)         | 101.7 (50.8 - 291.6)        | 41 (18.3 to 63.7)             | 0.001   | Not assessed                | Not assessed                | ---                           | ---     |
| IL-8    | 46.0 (2.0 - 91.0)           | 106.9 (43.8 - 281.4)        | 60.9 (35.6 to 86.2)           | < 0.001 | Not assessed                | Not assessed                | ---                           | ---     |
| IL-10   | 16.0 (0.0 - 40.3)           | 47.9 (0.0 - 120.7)          | 31.9 (20.2 to 43.6)           | < 0.001 | Not assessed                | Not assessed                | ---                           | ---     |
| TNFR-I  | 2604.0 (1950.0 - 3777.0)    | 6897.0 (3622.5 - 12281.5)   | 4293 (3323.6 to 5262.4)       | < 0.001 | Not assessed                | Not assessed                | ---                           | ---     |
| TNFR-II | 6581.0 (4958.0 - 9658.0)    | 18611.0 (12262.5 - 35652.0) | 12030 (9577.5 to 14482.5)     | < 0.001 | Not assessed                | Not assessed                | ---                           | ---     |
| SPA     | 29.0 (11.8 - 68.0)          | 25.0 (10.5 - 40.0)          | -4 (-19.9 to 11.9)            | 0.398   | Not assessed                | Not assessed                | ---                           | ---     |
| SPD     | 76.0 (36.2 - 145.2)         | 59.0 (30.0 - 125.0)         | -18 (-52.6 to 16.6)           | 0.254   | Not assessed                | Not assessed                | ---                           | ---     |
| VW      | 308.0 (165.5 - 431.0)       | 384.0 (246.0 - 549.0)       | 76 (-26.5 to 178.5)           | 0.045   | Not assessed                | Not assessed                | ---                           | ---     |

18 Data are median (quartile 25<sup>th</sup> - quartile 75<sup>th</sup>).

19 Abbreviations: 95%CI denotes 95% confidence interval, ICAM-1 is intercellular adhesion molecule-1, IL-6 is interleukin-6, PAI-1 is plasminogen activator inhibitor-1, IL-8 is interleukin-8, IL-10 is interleukin-10, TNFR-I is tumor necrosis factor receptor 1, TNFR-II is tumor necrosis factor II, SPA is surfact protein A, SPD is surfact Protein D and VW is Von Willebrand factor.

**eTable 9 - Percentage of missingness in biomarker levels measured on day of randomization, on ARMA and ALVEOLI trials for patients with an assigned subphenotype**

| Biomarker | ARMA<br>(n = 379) |                | ALVEOLI<br>(n = 493) |                |
|-----------|-------------------|----------------|----------------------|----------------|
|           | Subphenotype A    | Subphenotype B | Subphenotype A       | Subphenotype B |
| ICAM-1    | 43%               | 31%            | 4%                   | 3%             |
| IL-6      | 41%               | 33%            | 4%                   | 4%             |
| PAI-1     | 42%               | 32%            | Not assessed         | Not assessed   |
| IL-8      | 41%               | 33%            | Not assessed         | Not assessed   |
| IL-10     | 42%               | 33%            | Not assessed         | Not assessed   |
| TNFR-I    | 68%               | 61%            | Not assessed         | Not assessed   |
| TNFR-II   | 68%               | 61%            | Not assessed         | Not assessed   |
| SPA       | 67%               | 61%            | Not assessed         | Not assessed   |
| SPD       | 67%               | 61%            | Not assessed         | Not assessed   |
| VW        | 67%               | 61%            | Not assessed         | Not assessed   |

Abbreviations: ICAM-1 is intercellular adhesion molecule-1, IL-6 is interleukin-6, PAI-1 is plasminogen activator inhibitor-1, IL-8 is interleukin-8, IL-10 is interleukin-10, TNFR-I is tumor necrosis factor receptor 1, TNFR-II is tumor necrosis factor II, SPA is surfact protein A, SPD is surfact Protein D and VW is Von Willebrand factor.

eFigure 1 - Calinski-Harabasz Index and Elbow Method for Each of the 10 Models

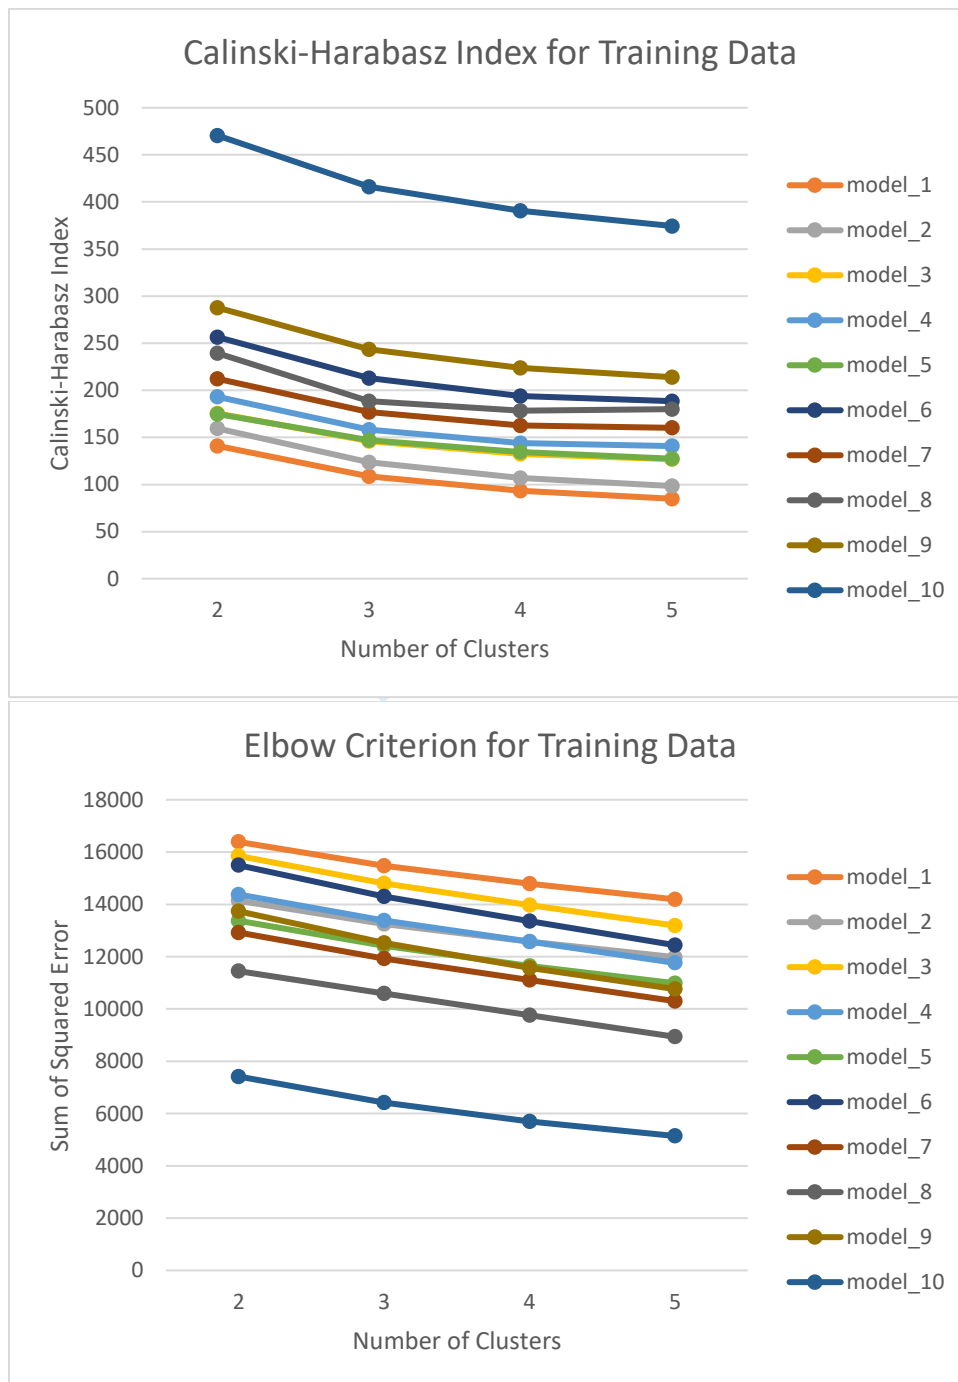

eFigure 2 - Variable Averages for Each Study

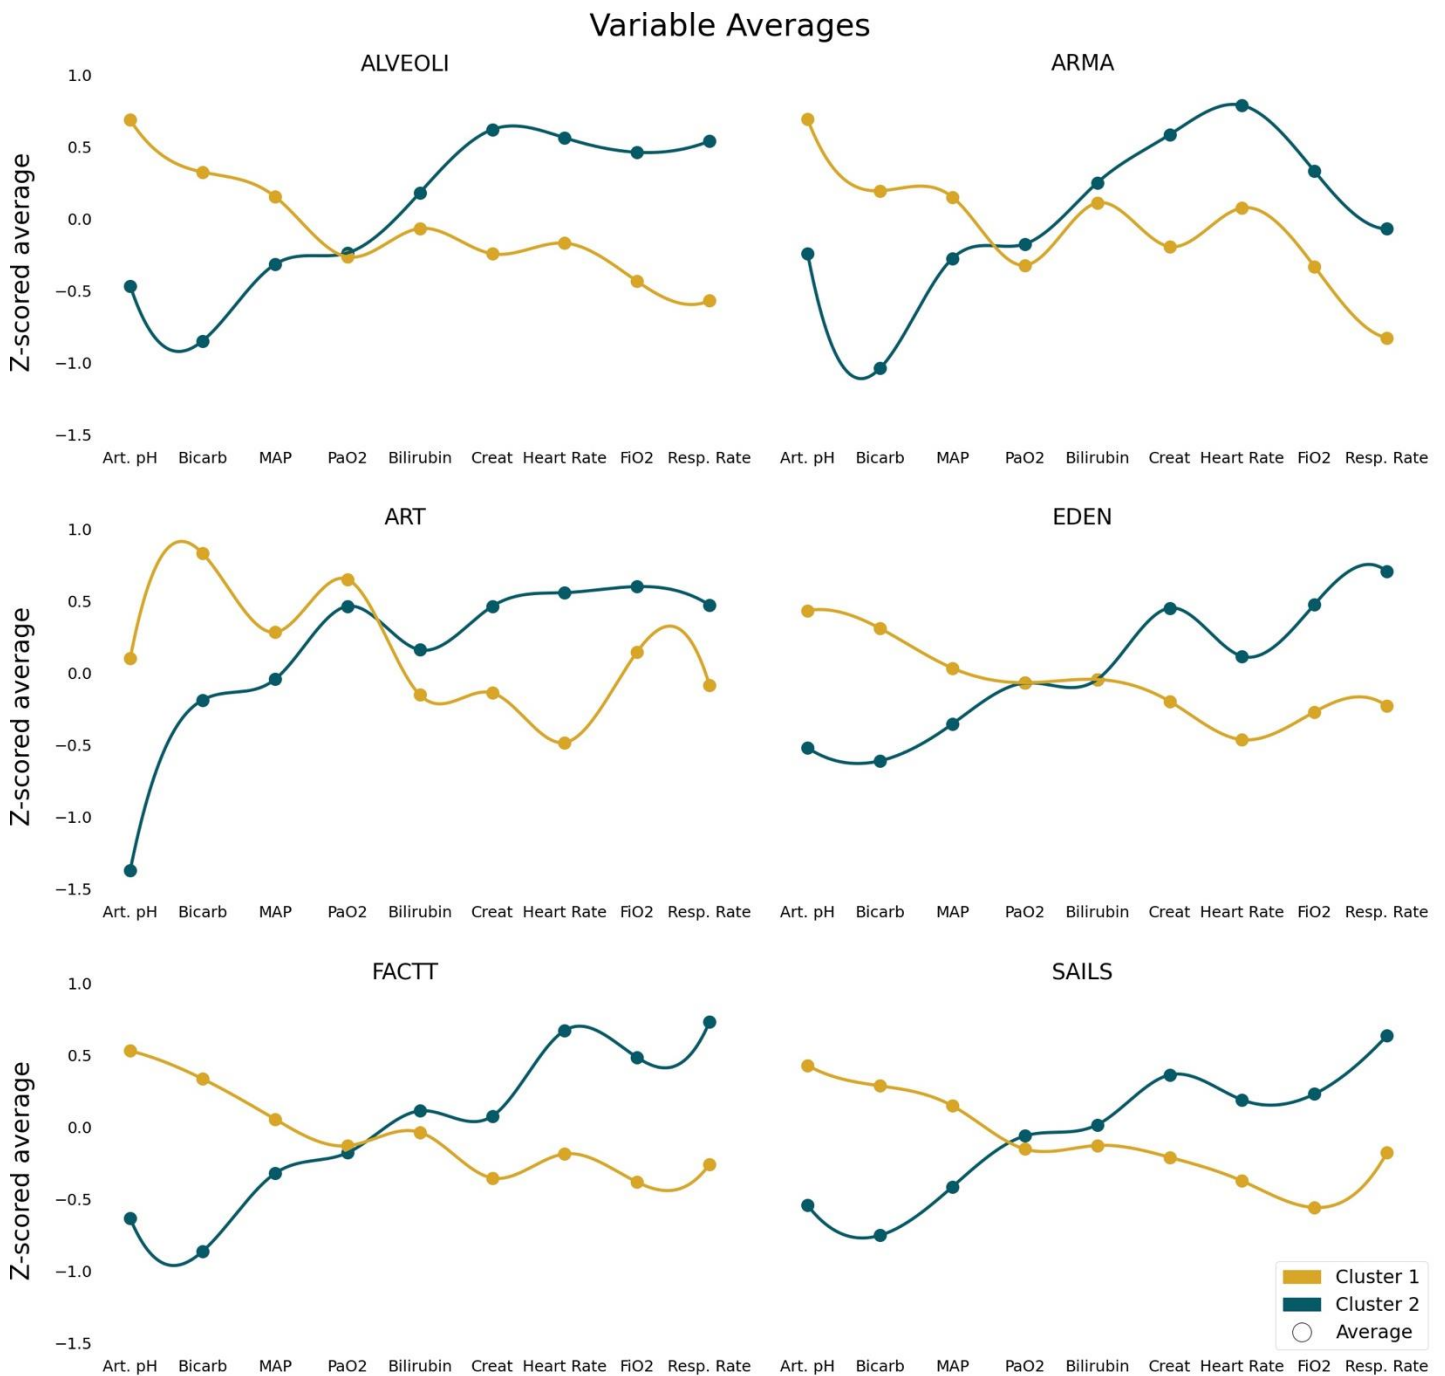

The circles represent the averages for each variable. The colored lines are exclusively to help visualize the opposite trends of the variables on the different clusters.

Abbreviations: Art. pH is arterial pH, Bicarb is bicarbonate, MAP is mean arterial pressure, Creat is creatinine and Resp. Rate is respiratory rate



1  
2  
3  
4  
5  
6  
7  
8  
9  
10  
11  
12  
13  
14  
15  
16  
17  
18  
19  
20  
21  
22  
23  
24  
25  
26  
27  
28  
29  
30  
31  
32  
33  
34  
35  
36  
37  
38  
39  
40  
41  
42  
43  
44  
45  
46  
47  
48  
49  
50  
51  
52  
53  
54  
55  
56  
57  
58  
59  
60

## Reference:

1. Yehya N, Harhay MO, Curley MAQ, Schoenfeld DA, Reeder RW. Reappraisal of Ventilator-Free Days in Critical Care Research. *Am J Respir Crit Care Med.* 2019 Oct 1;200(7):828-836. doi: 10.1164/rccm.201810-2050CP.

For peer review only

# Reporting checklist for prediction model development/validation.

Based on the TRIPOD guidelines.

## Instructions to authors

Complete this checklist by entering the page numbers from your manuscript where readers will find each of the items listed below.

Your article may not currently address all the items on the checklist. Please modify your text to include the missing information. If you are certain that an item does not apply, please write "n/a" and provide a short explanation.

Upload your completed checklist as an extra file when you submit to a journal.

In your methods section, say that you used the TRIPOD reporting guidelines, and cite them as:

Collins GS, Reitsma JB, Altman DG, Moons KG. Transparent reporting of a multivariable prediction model for individual prognosis or diagnosis (TRIPOD): The TRIPOD statement.

|                     | Reporting Item                                                                                                                                                                                                       | Page Number |
|---------------------|----------------------------------------------------------------------------------------------------------------------------------------------------------------------------------------------------------------------|-------------|
| <b>Title</b>        |                                                                                                                                                                                                                      |             |
|                     | <a href="#">#1</a> Identify the study as developing and / or validating a multivariable prediction model, the target population, and the outcome to be predicted.                                                    | 1           |
| <b>Abstract</b>     |                                                                                                                                                                                                                      |             |
|                     | <a href="#">#2</a> Provide a summary of objectives, study design, setting, participants, sample size, predictors, outcome, statistical analysis, results, and conclusions.                                           | 2           |
| <b>Introduction</b> |                                                                                                                                                                                                                      |             |
|                     | <a href="#">#3a</a> Explain the medical context (including whether diagnostic or prognostic) and rationale for developing or validating the multivariable prediction model, including references to existing models. | 6           |
|                     | <a href="#">#3b</a> Specify the objectives, including whether the study describes the                                                                                                                                | 6           |

development or validation of the model or both.

## Methods

|    |                              |                      |                                                                                                                                                                         |     |
|----|------------------------------|----------------------|-------------------------------------------------------------------------------------------------------------------------------------------------------------------------|-----|
| 1  |                              |                      |                                                                                                                                                                         |     |
| 2  |                              |                      |                                                                                                                                                                         |     |
| 3  | <b>Methods</b>               |                      |                                                                                                                                                                         |     |
| 4  |                              |                      |                                                                                                                                                                         |     |
| 5  | Source of data               | <a href="#">#4a</a>  | Describe the study design or source of data (e.g., randomized trial, cohort, or registry data), separately for the development and validation data sets, if applicable. | 8   |
| 6  |                              |                      |                                                                                                                                                                         |     |
| 7  |                              |                      |                                                                                                                                                                         |     |
| 8  |                              |                      |                                                                                                                                                                         |     |
| 9  |                              |                      |                                                                                                                                                                         |     |
| 10 | Source of data               | <a href="#">#4b</a>  | Specify the key study dates, including start of accrual; end of accrual; and, if applicable, end of follow-up.                                                          | 8   |
| 11 |                              |                      |                                                                                                                                                                         |     |
| 12 |                              |                      |                                                                                                                                                                         |     |
| 13 |                              |                      |                                                                                                                                                                         |     |
| 14 | Participants                 | <a href="#">#5a</a>  | Specify key elements of the study setting (e.g., primary care, secondary care, general population) including number and location of centres.                            | 8   |
| 15 |                              |                      |                                                                                                                                                                         |     |
| 16 |                              |                      |                                                                                                                                                                         |     |
| 17 |                              |                      |                                                                                                                                                                         |     |
| 18 | Participants                 | <a href="#">#5b</a>  | Describe eligibility criteria for participants.                                                                                                                         | 8   |
| 19 |                              |                      |                                                                                                                                                                         |     |
| 20 | Participants                 | <a href="#">#5c</a>  | Give details of treatments received, if relevant                                                                                                                        | 8   |
| 21 |                              |                      |                                                                                                                                                                         |     |
| 22 | Outcome                      | <a href="#">#6a</a>  | Clearly define the outcome that is predicted by the prediction model, including how and when assessed.                                                                  | 9   |
| 23 |                              |                      |                                                                                                                                                                         |     |
| 24 |                              |                      |                                                                                                                                                                         |     |
| 25 |                              |                      |                                                                                                                                                                         |     |
| 26 | Outcome                      | <a href="#">#6b</a>  | Report any actions to blind assessment of the outcome to be predicted.                                                                                                  | N/A |
| 27 |                              |                      |                                                                                                                                                                         |     |
| 28 |                              |                      |                                                                                                                                                                         |     |
| 29 | Predictors                   | <a href="#">#7a</a>  | Clearly define all predictors used in developing or validating the multivariable prediction model, including how and when they were measured                            | 8   |
| 30 |                              |                      |                                                                                                                                                                         |     |
| 31 |                              |                      |                                                                                                                                                                         |     |
| 32 |                              |                      |                                                                                                                                                                         |     |
| 33 |                              |                      |                                                                                                                                                                         |     |
| 34 | Predictors                   | <a href="#">#7b</a>  | Report any actions to blind assessment of predictors for the outcome and other predictors.                                                                              | N/A |
| 35 |                              |                      |                                                                                                                                                                         |     |
| 36 |                              |                      |                                                                                                                                                                         |     |
| 37 |                              |                      |                                                                                                                                                                         |     |
| 38 | Sample size                  | <a href="#">#8</a>   | Explain how the study size was arrived at.                                                                                                                              | 8   |
| 39 |                              |                      |                                                                                                                                                                         |     |
| 40 | Missing data                 | <a href="#">#9</a>   | Describe how missing data were handled (e.g., complete-case analysis, single imputation, multiple imputation) with details of any imputation method.                    | 9   |
| 41 |                              |                      |                                                                                                                                                                         |     |
| 42 |                              |                      |                                                                                                                                                                         |     |
| 43 |                              |                      |                                                                                                                                                                         |     |
| 44 |                              |                      |                                                                                                                                                                         |     |
| 45 | Statistical analysis methods | <a href="#">#10a</a> | If you are developing a prediction model describe how predictors were handled in the analyses.                                                                          | N/A |
| 46 |                              |                      |                                                                                                                                                                         |     |
| 47 |                              |                      |                                                                                                                                                                         |     |
| 48 |                              |                      |                                                                                                                                                                         |     |
| 49 | Statistical analysis methods | <a href="#">#10b</a> | If you are developing a prediction model, specify type of model, all model-building procedures (including any predictor selection), and method for internal validation. | N/A |
| 50 |                              |                      |                                                                                                                                                                         |     |
| 51 |                              |                      |                                                                                                                                                                         |     |
| 52 |                              |                      |                                                                                                                                                                         |     |
| 53 |                              |                      |                                                                                                                                                                         |     |
| 54 | Statistical analysis methods | <a href="#">#10c</a> | If you are validating a prediction model, describe how the predictions were calculated.                                                                                 | N/A |
| 55 |                              |                      |                                                                                                                                                                         |     |
| 56 |                              |                      |                                                                                                                                                                         |     |
| 57 |                              |                      |                                                                                                                                                                         |     |
| 58 | Statistical analysis         | <a href="#">#10d</a> | Specify all measures used to assess model performance and, if relevant,                                                                                                 | 10  |
| 59 |                              |                      |                                                                                                                                                                         |     |
| 60 |                              |                      |                                                                                                                                                                         |     |

|    |                      |                      |                                                                           |     |
|----|----------------------|----------------------|---------------------------------------------------------------------------|-----|
| 1  | methods              |                      | to compare multiple models.                                               |     |
| 2  | Statistical analysis | <a href="#">#10e</a> | If you are validating a prediction model, describe any model updating     | N/A |
| 3  | methods              |                      | (e.g., recalibration) arising from the validation, if done                |     |
| 4  |                      |                      |                                                                           |     |
| 5  |                      |                      |                                                                           |     |
| 6  | Risk groups          | <a href="#">#11</a>  | Provide details on how risk groups were created, if done.                 | 11  |
| 7  |                      |                      |                                                                           |     |
| 8  | Development vs.      | <a href="#">#12</a>  | For validation, identify any differences from the development data in     | 10  |
| 9  | validation           |                      | setting, eligibility criteria, outcome, and predictors.                   |     |
| 10 |                      |                      |                                                                           |     |
| 11 |                      |                      |                                                                           |     |
| 12 | <b>Results</b>       |                      |                                                                           |     |
| 13 |                      |                      |                                                                           |     |
| 14 | Participants         | <a href="#">#13a</a> | Describe the flow of participants through the study, including the        | 12  |
| 15 |                      |                      | number of participants with and without the outcome and, if applicable,   |     |
| 16 |                      |                      | a summary of the follow-up time. A diagram may be helpful.                |     |
| 17 |                      |                      |                                                                           |     |
| 18 | Participants         | <a href="#">#13b</a> | Describe the characteristics of the participants (basic demographics,     | 12  |
| 19 |                      |                      | clinical features, available predictors), including the number of         |     |
| 20 |                      |                      | participants with missing data for predictors and outcome.                |     |
| 21 |                      |                      |                                                                           |     |
| 22 | Participants         | <a href="#">#13c</a> | For validation, show a comparison with the development data of the        | 12  |
| 23 |                      |                      | distribution of important variables (demographics, predictors and         |     |
| 24 |                      |                      | outcome).                                                                 |     |
| 25 |                      |                      |                                                                           |     |
| 26 | Model                | <a href="#">#14a</a> | If developing a model, specify the number of participants and outcome     | 12  |
| 27 | development          |                      | events in each analysis.                                                  |     |
| 28 |                      |                      |                                                                           |     |
| 29 | Model                | <a href="#">#14b</a> | If developing a model, report the unadjusted association, if calculated   | N/A |
| 30 | development          |                      | between each candidate predictor and outcome.                             |     |
| 31 |                      |                      |                                                                           |     |
| 32 | Model                | <a href="#">#15a</a> | If developing a model, present the full prediction model to allow         | N/A |
| 33 | specification        |                      | predictions for individuals (i.e., all regression coefficients, and model |     |
| 34 |                      |                      | intercept or baseline survival at a given time point).                    |     |
| 35 |                      |                      |                                                                           |     |
| 36 | Model                | <a href="#">#15b</a> | If developing a prediction model, explain how to use it.                  | N/A |
| 37 | specification        |                      |                                                                           |     |
| 38 |                      |                      |                                                                           |     |
| 39 | Model                | <a href="#">#16</a>  | Report performance measures (with CIs) for the prediction model.          | 14  |
| 40 | performance          |                      |                                                                           |     |
| 41 |                      |                      |                                                                           |     |
| 42 | Model-updating       | <a href="#">#17</a>  | If validating a model, report the results from any model updating, if     | N/A |
| 43 |                      |                      | done (i.e., model specification, model performance).                      |     |
| 44 |                      |                      |                                                                           |     |
| 45 |                      |                      |                                                                           |     |
| 46 | <b>Discussion</b>    |                      |                                                                           |     |
| 47 |                      |                      |                                                                           |     |
| 48 | Limitations          | <a href="#">#18</a>  | Discuss any limitations of the study (such as nonrepresentative sample,   | 19  |
| 49 |                      |                      |                                                                           |     |
| 50 |                      |                      |                                                                           |     |

few events per predictor, missing data).

|    |                    |                      |                                                                             |
|----|--------------------|----------------------|-----------------------------------------------------------------------------|
| 1  |                    |                      |                                                                             |
| 2  |                    |                      |                                                                             |
| 3  | Interpretation     | <a href="#">#19a</a> | For validation, discuss the results with reference to performance in the 17 |
| 4  |                    |                      | development data, and any other validation data                             |
| 5  |                    |                      |                                                                             |
| 6  | Interpretation     | <a href="#">#19b</a> | Give an overall interpretation of the results, considering objectives, 17   |
| 7  |                    |                      | limitations, results from similar studies, and other relevant evidence.     |
| 8  |                    |                      |                                                                             |
| 9  |                    |                      |                                                                             |
| 10 | Implications       | <a href="#">#20</a>  | Discuss the potential clinical use of the model and implications for 20     |
| 11 |                    |                      | future research                                                             |
| 12 |                    |                      |                                                                             |
| 13 |                    |                      |                                                                             |
| 14 | <b>Other</b>       |                      |                                                                             |
| 15 | <b>information</b> |                      |                                                                             |
| 16 |                    |                      |                                                                             |
| 17 |                    |                      |                                                                             |
| 18 | Supplementary      | <a href="#">#21</a>  | Provide information about the availability of supplementary resources, 22   |
| 19 | information        |                      | such as study protocol, Web calculator, and data sets.                      |
| 20 |                    |                      |                                                                             |
| 21 | Funding            | <a href="#">#22</a>  | Give the source of funding and the role of the funders for the present 22   |
| 22 |                    |                      | study.                                                                      |
| 23 |                    |                      |                                                                             |
| 24 |                    |                      |                                                                             |

The TRIPOD checklist is distributed under the terms of the Creative Commons Attribution License CC-BY.

This checklist was completed on 07. May 2021 using <https://www.goodreports.org/>, a tool made by the

[EQUATOR Network](#) in collaboration with [Penelope.ai](#)

# BMJ Open

## Identification of Acute Respiratory Distress Syndrome subphenotypes denovo using routine clinical data: a retrospective analysis of ARDS clinical trials

|                                 |                                                                                                                                                                                                                                                                                                                                                                                                                                                                                                                                                                                                                                                                                                                                                                                                                                                                                                                                                                                                                                                                                                      |
|---------------------------------|------------------------------------------------------------------------------------------------------------------------------------------------------------------------------------------------------------------------------------------------------------------------------------------------------------------------------------------------------------------------------------------------------------------------------------------------------------------------------------------------------------------------------------------------------------------------------------------------------------------------------------------------------------------------------------------------------------------------------------------------------------------------------------------------------------------------------------------------------------------------------------------------------------------------------------------------------------------------------------------------------------------------------------------------------------------------------------------------------|
| Journal:                        | <i>BMJ Open</i>                                                                                                                                                                                                                                                                                                                                                                                                                                                                                                                                                                                                                                                                                                                                                                                                                                                                                                                                                                                                                                                                                      |
| Manuscript ID                   | bmjopen-2021-053297.R1                                                                                                                                                                                                                                                                                                                                                                                                                                                                                                                                                                                                                                                                                                                                                                                                                                                                                                                                                                                                                                                                               |
| Article Type:                   | Original research                                                                                                                                                                                                                                                                                                                                                                                                                                                                                                                                                                                                                                                                                                                                                                                                                                                                                                                                                                                                                                                                                    |
| Date Submitted by the Author:   | 26-Oct-2021                                                                                                                                                                                                                                                                                                                                                                                                                                                                                                                                                                                                                                                                                                                                                                                                                                                                                                                                                                                                                                                                                          |
| Complete List of Authors:       | Duggal, Abhijit ; Cleveland Clinic, Department of Critical Care Medicine<br>Kast, Rachel; Endpoint Health Inc, Department of Clinical Data Science<br>Van Ark, Emily; Endpoint Health Inc, Department of Clinical Data Science<br>Bulgarelli, Lucas; Endpoint Health Inc, Department of Clinical Data Science<br>Siuba, Matthew T.; Cleveland Clinic, Department of Critical Care Medicine<br>Osborn, Jeff; Endpoint Health Inc, Department of Clinical Data Science<br>Rey, Diego; Endpoint Health Inc, Department of Clinical Data Science<br>Zampieri, Fernando; HCor Research Institute<br>Cavalcanti, Alexandre ; HCor Research Institute<br>Maia, Israel; Hospital do Coracao<br>Paisani, Denise M; HCor Research Institute<br>Laranjeira, Ligia N; HCor Research Institute<br>Sarpa Neto, Ary; Monash University, Australian and New Zealand Intensive Care Research Centre (ANZIC-RC), School of Public Health and Preventive Medicine,; Hospital Israelita Albert Einstein, Critical Care Medicine<br>Deliberato, Rodrigo Octávio; Endpoint Health Inc, Department of Clinical Data Science |
| <b>Primary Subject Heading</b>: | Intensive care                                                                                                                                                                                                                                                                                                                                                                                                                                                                                                                                                                                                                                                                                                                                                                                                                                                                                                                                                                                                                                                                                       |
| Secondary Subject Heading:      | Respiratory medicine                                                                                                                                                                                                                                                                                                                                                                                                                                                                                                                                                                                                                                                                                                                                                                                                                                                                                                                                                                                                                                                                                 |
| Keywords:                       | Adult intensive & critical care < INTENSIVE & CRITICAL CARE, Adult intensive & critical care < ANAESTHETICS, RESPIRATORY MEDICINE (see Thoracic Medicine)                                                                                                                                                                                                                                                                                                                                                                                                                                                                                                                                                                                                                                                                                                                                                                                                                                                                                                                                            |
|                                 |                                                                                                                                                                                                                                                                                                                                                                                                                                                                                                                                                                                                                                                                                                                                                                                                                                                                                                                                                                                                                                                                                                      |

SCHOLARONE™  
Manuscripts



I, the Submitting Author has the right to grant and does grant on behalf of all authors of the Work (as defined in the below author licence), an exclusive licence and/or a non-exclusive licence for contributions from authors who are: i) UK Crown employees; ii) where BMJ has agreed a CC-BY licence shall apply, and/or iii) in accordance with the terms applicable for US Federal Government officers or employees acting as part of their official duties; on a worldwide, perpetual, irrevocable, royalty-free basis to BMJ Publishing Group Ltd ("BMJ") its licensees and where the relevant Journal is co-owned by BMJ to the co-owners of the Journal, to publish the Work in this journal and any other BMJ products and to exploit all rights, as set out in our [licence](#).

The Submitting Author accepts and understands that any supply made under these terms is made by BMJ to the Submitting Author unless you are acting as an employee on behalf of your employer or a postgraduate student of an affiliated institution which is paying any applicable article publishing charge ("APC") for Open Access articles. Where the Submitting Author wishes to make the Work available on an Open Access basis (and intends to pay the relevant APC), the terms of reuse of such Open Access shall be governed by a Creative Commons licence – details of these licences and which [Creative Commons](#) licence will apply to this Work are set out in our licence referred to above.

Other than as permitted in any relevant BMJ Author's Self Archiving Policies, I confirm this Work has not been accepted for publication elsewhere, is not being considered for publication elsewhere and does not duplicate material already published. I confirm all authors consent to publication of this Work and authorise the granting of this licence.

# Identification of Acute Respiratory Distress Syndrome subphenotypes de novo using routine clinical data: a retrospective analysis of ARDS clinical trials

Abhijit Duggal MD<sup>1</sup>‡, Rachel Kast PhD<sup>2</sup>‡, Emily Van Ark PhD<sup>2</sup>‡, Lucas Bulgarelli BSc<sup>2</sup>‡, Matthew T. Siuba DO<sup>1</sup>, Jeff Osborn<sup>2</sup>, Diego Rey PhD<sup>2</sup>, Fernando G Zampieri MD PhD<sup>3</sup>, Alexandre B Cavalcanti MD PhD<sup>3</sup>, Israel S Maia MD<sup>3</sup>, Denise M Paisani PhD<sup>3</sup>, Ligia N Laranjeira<sup>3</sup>, Ary Serpa Neto MD MSc PhD,<sup>4,5,6,7,8</sup> Rodrigo Octávio Deliberato MD PhD<sup>2</sup>

‡ Authors contributed equally

1. Department of Critical Care Medicine, Respiratory Institute, Cleveland Clinic, Cleveland, Ohio, USA.
2. Department of Clinical Data Science, Endpoint Health Inc, Palo Alto, California, USA.
3. HCor Research Institute, São Paulo, Brazil
4. Australian and New Zealand Intensive Care Research Centre (ANZIC-RC), School of Public Health and Preventive Medicine, Monash University, Melbourne, Australia.
5. Department of Critical Care, Melbourne Medical School, University of Melbourne, Austin Hospital, Melbourne, Australia.
6. Department of Intensive Care, Austin Hospital, Melbourne, Australia.
7. Data Analytics Research and Evaluation (DARE) Centre, Austin Hospital, Melbourne, Australia.
8. Department of Critical Care Medicine, Hospital Israelita Albert Einstein, São Paulo, Brazil.

## Correspondence:

Abhijit Duggal MD

Address: 9500 Euclid Ave, L2-330, Cleveland, Ohio, 44195

E-mail: [duggala2@ccf.org](mailto:duggala2@ccf.org)



1  
2  
3 **Word count (Abstract):** 236 words  
4

5 **Word count (Text):** 2814 words  
6

7 **Number of figures:** 2 figures  
8

9 **Number of tables:** 3 tables  
10

11 **Supplementary Material:** 01  
12

13 **Key words:** Subphenotype, machine learning, ARDS, critical care, clinical data,  
14 clustering  
15  
16  
17  
18  
19  
20  
21  
22  
23  
24  
25  
26  
27  
28  
29  
30  
31  
32  
33  
34  
35  
36  
37  
38  
39  
40  
41  
42  
43  
44  
45  
46  
47  
48  
49  
50  
51  
52  
53  
54  
55  
56  
57  
58  
59  
60

For peer review only

## ABSTRACT

**Objectives:** The acute respiratory distress syndrome (ARDS) is a heterogeneous condition, and identification of subphenotypes may help in better risk stratification. Our study objective is to identify ARDS subphenotypes using new simpler methodology and readily available clinical variables.

**Setting:** This is a retrospective Cohort Study of ARDS trials. Data from the U.S. ARDSNet trials and from the international ART trial.

**Participants:** 3763 patients from ARDSNet datasets and 1010 patients from the ART dataset.

**Primary and secondary outcome measures:** The primary outcome was 60-day or 28-day mortality, depending on what was reported in the original trial. K-means cluster analysis was performed to identify subgroups. Sets of candidate variables were tested to assess their ability to produce different probabilities for mortality in each cluster. Clusters were compared to biomarker data, allowing identification of subphenotypes.

**Results:** Data from 4,773 patients was analyzed. Two subphenotypes (A and B) resulted in optimal separation in the final model, which included nine routinely collected clinical variables, namely: heart rate, mean arterial pressure, respiratory rate, bilirubin, bicarbonate, creatinine, PaO<sub>2</sub>, arterial pH, and FiO<sub>2</sub>. Participants in subphenotype B showed increased levels of pro-inflammatory markers, had consistently higher mortality, lower number of ventilator-free days at day 28, and longer duration of ventilation compared to patients in the subphenotype A.

1  
2  
3 **Conclusions:** Routinely available clinical data can successfully identify two distinct  
4 subphenotypes in adult ARDS patients. This work may facilitate implementation of  
5 precision therapy in ARDS clinical trials.  
6  
7  
8  
9  
10  
11  
12  
13  
14  
15  
16  
17  
18  
19  
20  
21  
22  
23  
24  
25  
26  
27  
28  
29  
30  
31  
32  
33  
34  
35  
36  
37  
38  
39  
40  
41  
42  
43  
44  
45  
46  
47  
48  
49  
50  
51  
52  
53  
54  
55  
56  
57  
58  
59  
60

For peer review only

## ARTICLE SUMMARY

### Strengths and limitations of this study

- Largest cohort of patients used to identify subphenotypes of ARDS patients.
- Subphenotypes were validated in the population of a large international ARDS randomized controlled trial.
- Subphenotypes were identified by using only routinely collected clinical data.
- Our use of data exclusively from randomized controlled trials does not prove generalizability to unselected ARDS populations.
- The clinical utility of the subphenotypes has to be validated in a prospective study.

## INTRODUCTION

The Berlin definition of acute respiratory distress syndrome (ARDS) encompasses acute hypoxemic respiratory failure due to a wide variety of etiologies [1]. Due to this inclusion of heterogeneous conditions within the syndrome, there are significant clinical and biological differences that make ARDS challenging to treat [2,3]. These differences amongst ARDS patients are associated with variation in risk of disease development and progression [3,4], potentially generating differential responses to treatments and interventions [5–10]. Despite evidence, clinical risk stratification of ARDS patients still solely depends on PaO<sub>2</sub>/FiO<sub>2</sub> ratios [11,12], possibly misleading the interpretation of results in clinical trials and clinicians when evaluating treatment options for patients [13].

Therefore, identifying groups of patients who have similar clinical, physiologic, or biomarker traits becomes relevant [6,14] as it can help with stratification of patients producing better targeted therapies and interventions [15]. These different groups can be defined as ARDS subphenotypes [4,14]. Two ARDS subphenotypes have been consistently identified in previous studies [6–10,16–18]. However, these models are complex, and significant barriers exist in their implementation and use in clinical practice. Existing models use up to 40 predictor variables, including biomarkers and other variables that are not readily available at the bedside [6–10,16–18]. These limitations explain the current status quo of ARDS care, where clinicians must depend on the limited prognostic value of PaO<sub>2</sub>/FiO<sub>2</sub> ratios instead of biologically distinct subphenotypes.

We hypothesized that the use of a simpler methodology and a small number of easily available clinical variables could identify new ARDS subphenotypes and thus provide the means to allow future implementation of bedside stratification.

## METHODS

### Data source and participants

We performed a retrospective study using a de-identified dataset pooling data from six randomized clinical trials in patients with ARDS, namely: ARMA, ALVEOLI, FACTT, EDEN, SAILS, and ART [19–24]. Patients in ARMA, ALVEOLI, FACTT, EDEN, and SAILS trials were eligible if they met the American-European consensus for ARDS, including patients with a  $\text{PaO}_2 / \text{FiO}_2$  ratio  $< 300$  up to 48 hours before enrollment. From 1996 to 2013, these trials enrolled 902, 549, 1000, 1000, and 745 patients, respectively, and tested a variety of interventions [19–23]. Between 2011 and 2017 the international ART study enrolled 1010 adult patients diagnosed with moderate to severe ARDS according to the Berlin definition ( $\text{PaO}_2 / \text{FiO}_2$  ratio  $< 200$ ) for less than 72 hours of duration and assessed two different ventilatory strategies [24]. To avoid biases due to high mortality in the high tidal volume group of the ARMA study [19], which has not been standard of care since the beginning of 2000, only 473 patients receiving low tidal volume in that study were included.

### Predictors

Six clinical trials were assessed to identify a set of clinical variables recorded closest to time of randomization which were most commonly available across all datasets. The list of potential candidates was then further refined to include only those that are frequently observed in the routine care of ARDS patients at the time of its diagnosis according to judgement provided by ICU physicians who participated in this study. To develop a clustering algorithm for potential rapid translation into clinical use, elements which would not be commonly found in the electronic health records (EHR) at the time of ARDS

1  
2  
3 diagnosis, such as biomarker levels, ARDS risk factors, organ support apart from  
4 mechanical ventilation settings, and severity scores, were excluded from model  
5 development. The treatment assignment in the original trials, and clinical outcomes were  
6 not considered in the model development.  
7  
8  
9  
10  
11

12 After all assessment, 16 variables that are routinely collected as part of the usual  
13 care and which were uniformly present in all the trials were considered, including: age,  
14 gender, arterial pH, PaO<sub>2</sub>, PaCO<sub>2</sub>, bicarbonate, creatinine, bilirubin, platelets, heart rate,  
15 respiratory rate, mean arterial pressure, positive end-expiratory pressure (PEEP), plateau  
16 pressure, FiO<sub>2</sub>, and tidal volume adjusted for predicted body weight (mL/kg PBW). The  
17 PBW was calculated as equal to  $50 + 0.91$  (centimeters of height – 152.4) in males, and  
18  $45.5 + 0.91$  (centimeters of height – 152.4) in females [18]. These variables were grouped  
19 into five domains named demographics, arterial blood gases, laboratory values, vital  
20 signs, and ventilatory variables. Plateau pressure was excluded due to a high rate of  
21 missingness across the trials included in the training set. Amount of missing data in the  
22 training datasets is reported in **eTable 1**.  
23  
24  
25  
26  
27  
28  
29  
30  
31  
32  
33  
34  
35  
36

### 37 **Outcomes**

38 The primary outcome was 60-day mortality for all ARDSnet trials, and 28-day mortality  
39 for ART trial. Secondary outcomes included 90-day mortality, number of ventilator free  
40 days at day 28 [25], and the duration of mechanical ventilation in survivors within the first  
41 28 days post enrollment.  
42  
43  
44  
45  
46  
47  
48

### 49 **Data preparation**

50 Data preprocessing was performed before modeling, and the pooled dataset was  
51 assessed for completeness and consistency. Patients with values out of the plausible  
52  
53  
54  
55  
56  
57  
58  
59  
60

1  
2  
3 physiological range for a specific variable were excluded from the final analysis  
4  
5 (described in **eTable 2**). The training dataset was constructed using data from the two  
6  
7 largest ARDSnet trials, EDEN and FACTT. The validation dataset was sourced from the  
8  
9 four remaining trials: ALVEOLI, ARMA, SAILS, and ART. Means and standard deviations  
10  
11 for z-scoring variables were calculated from the training dataset and subsequently applied  
12  
13 to the validation data.  
14  
15

### 16 17 **Statistical analysis**

18  
19 Baseline and outcome data were presented according to the assigned cluster.  
20  
21 Continuous variables were presented as medians with their interquartile ranges and  
22  
23 categorical variables as total number and percentage. Proportions were compared using  
24  
25 Fisher exact tests and continuous variables were compared using the Wilcoxon rank-sum  
26  
27 test. Study outcomes were further compared using the median and mean absolute  
28  
29 differences for continuous and categorical values, respectively.  
30  
31

### 32 33 **Model development and validation**

34  
35 For the model development, the K-means clustering algorithm was used. K-means is one  
36  
37 of the simplest and most used classes of clustering algorithms. In critical care research,  
38  
39 unsupervised machine learning techniques have already been used in several studies,  
40  
41 attempting to find homogeneous subgroups within a broad heterogeneous population  
42  
43 [26]. This specific algorithm identifies a K number of clusters in a dataset by finding K  
44  
45 centroids within the n-dimensional space of clinical features [26].  
46  
47  
48

49 For feature selection, different sets of candidate variables were tested to assess  
50  
51 their ability to produce significantly different mortality probabilities in each cluster using  
52  
53 the minimum amount of readily available clinical data. For each set of candidate variables,  
54  
55  
56  
57  
58  
59



1  
2  
3 the optimal number of clusters was determined by comparing models with between 2 and  
4  
5 5 clusters, using the Elbow method [27] and the Calinski-Harabasz index [28]. Information  
6  
7 about the methods for selecting the number of clusters are provided in the supplemental  
8  
9 material.  
10

11  
12 The following steps were performed for the final model selection: 1) all predictors  
13  
14 were assessed for correlation (**eTable 3**); and 2) ten different combinations of the  
15  
16 proposed variables were investigated. These combinations were developed based on the  
17  
18 perceived clinical importance of each variable and its combinations. All 10 models were  
19  
20 tested for the optimal number of clusters based on both the Elbow method and the  
21  
22 Calinski-Harabasz index, as described above. The models were then compared, aiming  
23  
24 for the minimum set of variables with high 60-day mortality separation. The description of  
25  
26 each model is shown in **eTable 4**.  
27  
28  
29

30  
31 Biological and clinical characteristics of the clusters were evaluated using clinical,  
32  
33 laboratory, and (when available) biomarker data to establish subphenotypes [4]. All  
34  
35 iterations in model development were done on the training set and the generalizability of  
36  
37 the final model was assessed using the validation dataset. K-means clustering analysis  
38  
39 is structured to ignore cases with missing data. No assumption was made for  
40  
41 missingness, and we therefore conducted a complete case analysis. Model development  
42  
43 and evaluation was performed using Python version 3.8 and scikit-learn 0.23.1.  
44  
45  
46  
47  
48

## 49 **Patient and public involvement**

50  
51 There was no patient involvement in this study.  
52  
53  
54  
55  
56  
57  
58  
59  
60

### Data availability

Data from the ARDSnet studies (EDEN, FACTT, ARMA, ALVEOLI and SAILS) is publicly available from the NHLBI ARDS Network and data from the ART trial can be requested from study authors.

For peer review only

## RESULTS

### Participants

Data from 4777 clinical trial patients were considered for inclusion. In total, 4 patients were excluded for having clinical measurements outside plausible range. The remaining 1998 patients from EDEN and FACTT trials were included in the training set, while the 2775 patients from ARMA, ALVEOLI, SAILS, and ART were included in the validation cohort.

Baseline characteristics of the patients in the training and validation sets are presented in **Table 1**. Pneumonia was the prevailing etiology followed by sepsis and aspiration in all trials. Between 29.3% to 72.7% of the patients were receiving vasopressors at the time of randomization. At randomization, PaO<sub>2</sub> / FiO<sub>2</sub> ratio ranged from 112 (75 - 158) to 134 (96 - 185) mmHg, and PEEP from 8 (5 - 10) to 12 (10 - 14) cmH<sub>2</sub>O across trials. Mortality at 60 days for the ARDSnet trials ranged from 22.7% to 30.1%, while in the ART trial mortality at 28 days was 58.8%.

|                        | Training set (n = 1998) |                    | Validation set (n = 2775) |                    |                    |                    |
|------------------------|-------------------------|--------------------|---------------------------|--------------------|--------------------|--------------------|
|                        | EDEN<br>(n = 1000)      | FACTT<br>(n = 998) | ALVEOLI<br>(n = 549)      | ARMA<br>(n = 472)  | ART<br>(n = 1010)  | SAILS<br>(n = 744) |
| Age, year              | 52.0 (42.0 - 63.0)      | 49.0 (38.0 - 60.8) | 50.0 (39.0 - 65.0)        | 50.0 (37.8 - 65.0) | 52.0 (36.0 - 64.0) | 55.0 (42.0 - 66.0) |
| Male gender - no. (%)  | 510 (51.0)              | 533 (53.4)         | 302 (55.0)                | 285 (60.4)         | 631 (62.5)         | 365 (49.0)         |
| Etiology - no. (%)     |                         |                    |                           |                    |                    |                    |
| Pneumonia              | 650 (65.0)              | 471 (47.2)         | 221 (40.3)                | 145 (30.7)         | 555 (55.0)         | 526 (70.7)         |
| Sepsis                 | 147 (14.7)              | 231 (23.1)         | 120 (21.9)                | 125 (26.5)         | 196 (19.4)         | 147 (19.8)         |
| Aspiration             | 96 (9.6)                | 149 (14.9)         | 84 (15.3)                 | 72 (15.3)          | 58 (5.7)           | 49 (6.6)           |
| Trauma                 | 36 (3.6)                | 74 (7.4)           | 45 (8.2)                  | 59 (12.5)          | 31 (3.1)           | 6 (0.8)            |
| Other                  | 71 (7.1)                | 73 (7.3)           | 79 (14.4)                 | 71 (15.0)          | 170 (16.8)         | 16 (2.2)           |
| Severity of illness*   | 73.0 (59.0 - 89.0)      | 78.0 (62.0 - 94.0) | 78.0 (64.0 - 93.0)        | 83.0 (70.0 - 97.0) | 63.0 (50.2 - 75.0) | 76.0 (61.0 - 92.0) |
| Vasopressors - no. (%) | 489 (48.9)              | 397 (40.5)         | 156 (29.3)                | 147 (31.3)         | 734 (72.7)         | 395 (54.2)         |
| Laboratory tests       |                         |                    |                           |                    |                    |                    |

|                                                                                                                           |                    |                    |                    |                    |                    |                    |
|---------------------------------------------------------------------------------------------------------------------------|--------------------|--------------------|--------------------|--------------------|--------------------|--------------------|
| White blood cell count, 10 <sup>9</sup> /L                                                                                | 12.0 (7.8 - 16.7)  | 11.8 (7.2 - 17.1)  | 11.6 (7.7 - 15.7)  | 11.5 (7.5 - 16.2)  | ---                | 13.9 (8.7 - 20.0)  |
| Platelets, 10 <sup>9</sup> /L                                                                                             | 169 (108 - 241)    | 183 (106 - 258)    | 157 (83 - 247)     | 135 (80 - 211)     | 175 (106 - 263)    | 167 (96 - 247)     |
| Creatinine, mg/dL                                                                                                         | 1.2 (0.8 - 2.0)    | 1.0 (0.7 - 1.5)    | 1.0 (0.7 - 1.7)    | 1.1 (0.8 - 1.7)    | 1.3 (0.8 - 2.2)    | 1.0 (0.7 - 1.7)    |
| Bilirubin, mg/dL                                                                                                          | 0.8 (0.5 - 1.4)    | 0.8 (0.5 - 1.6)    | 0.8 (0.5 - 1.5)    | 1.0 (0.6 - 2.1)    | 0.8 (0.4 - 1.5)    | 0.8 (0.5 - 1.4)    |
| Arterial blood gas                                                                                                        |                    |                    |                    |                    |                    |                    |
| pH*                                                                                                                       | 7.36 (7.30 - 7.42) | 7.37 (7.30 - 7.43) | 7.40 (7.34 - 7.44) | 7.41 (7.35 - 7.45) | 7.28 (7.19 - 7.36) | 7.37 (7.31 - 7.42) |
| PaO <sub>2</sub> , mmHg                                                                                                   | 83 (68 - 108)      | 79 (67 - 100)      | 77 (67 - 93)       | 76.5 (67 - 93)     | 112 (81 - 155)     | 83 (69 - 103)      |
| PaO <sub>2</sub> / FiO <sub>2</sub>                                                                                       | 125 (86 - 178)     | 118 (80 - 163)     | 134 (96 - 185)     | 112 (75 - 158)     | 112 (81 - 155)     | 133 (89 - 178)     |
| PaCO <sub>2</sub> , mmHg                                                                                                  | 38 (34 - 45)       | 39 (34 - 45)       | 38 (33 - 43)       | 36 (31 - 41)       | 50 (42 - 62)       | 39 (34 - 45)       |
| Bicarbonate, mmol/L                                                                                                       | 21.0 (18.0 - 25.0) | 21.0 (17.4 - 25.0) | 22.0 (18.0 - 26.0) | 22.0 (18.0 - 25.0) | 22.9 (19.4 - 26.3) | 22.0 (18.0 - 25.0) |
| Ventilatory variables                                                                                                     |                    |                    |                    |                    |                    |                    |
| Tidal volume, mL                                                                                                          | 410 (360 - 470)    | 450 (400 - 510)    | 500 (420 - 600)    | 700 (600 - 750)    | 350 (308 - 400)    | 400 (350 - 460)    |
| Per PBW, mL/kg PBW                                                                                                        | 6.3 (6.0 - 7.3)    | 7.1 (6.1 - 8.1)    | 7.9 (6.6 - 9.4)    | 10.2 (9.0 - 11.3)  | 5.9 (5.1 - 6.1)    | 6.2 (6.0 - 7.1)    |
| Plateau pressure, cmH <sub>2</sub> O                                                                                      | 24.0 (20.0 - 27.0) | 26.0 (22.0 - 30.0) | 26.0 (22.0 - 31.0) | 29.0 (24.8 - 34.0) | 26.0 (22.0 - 29.0) | 24.0 (19.0 - 28.0) |
| PEEP, cmH <sub>2</sub> O                                                                                                  | 10 (5 - 12)        | 10 (5 - 12)        | 10 (5 - 12)        | 8 (5 - 10)         | 12 (10 - 14)       | 10 (5 - 11)        |
| FiO <sub>2</sub>                                                                                                          | 0.60 (0.50 - 0.80) | 0.60 (0.50 - 0.80) | 0.60 (0.50 - 0.80) | 0.60 (0.50 - 0.74) | 0.70 (0.60 - 1.00) | 0.60 (0.40 - 0.70) |
| Clinical outcomes                                                                                                         |                    |                    |                    |                    |                    |                    |
| 28-day mort. - no. (%)                                                                                                    | ---                | ---                | ---                | ---                | 594 (58.8)         | ---                |
| 60-day mort. - no. (%)                                                                                                    | 227 (22.7)         | 268 (26.9)         | 144 (26.2)         | 141 (30.1)         | ---                | 199 (26.7)         |
| 90-day mort. - no. (%)                                                                                                    | 233 (23.3)         | 283 (28.6)         | 148 (27.5)         | 143 (30.8)         | ---                | 204 (27.4)         |
| Ventilator-free days, day 28                                                                                              | 20.0 (0.0 - 24.0)  | 17.0 (0.0 - 23.0)  | 18.0 (0.0 - 24.0)  | 13.0 (0.0 - 23.0)  | 0.0 (0.0 - 13.0)   | 20.0 (0.0 - 25.0)  |
| Ventilator days in survivors                                                                                              | 7.0 (4.0 - 13.0)   | 8.0 (5.0 - 16.0)   | 8.0 (4.0 - 14.0)   | 8.0 (4.0 - 15.0)   | 13.0 (8.0 - 20.0)  | 6.0 (4.0 - 11.0)   |
| Data are median (quartile 25th - quartile 75th) or N (%)                                                                  |                    |                    |                    |                    |                    |                    |
| Abbreviations: 28-day mort. is 28-day mortality, 60-day mort. is 60 days mortality, and 90-day mort. is 90-day mortality. |                    |                    |                    |                    |                    |                    |
| * Except for ART, that uses SAPS-3, all studies use APACHE-IV                                                             |                    |                    |                    |                    |                    |                    |

## Predictor variables and model selection

The correlation between the 15 variables selected for clustering is shown in **eTable 3**.

The strongest correlation was between PEEP and FiO<sub>2</sub> ( $r = 0.49$ ). The comparison of the 10 models regarding the optimal number of clusters based on both the Elbow method and the Calinski-Harabasz index is shown in **eFigure 1**. In all models and methods, two clusters were a better fit than a higher number of clusters.

Across the ten models, absolute mortality difference between cluster 1 and cluster 2 ranged from 3.9% to 13.1% for the FACTT study and between 0.1% to 8.1% for EDEN (eTable 4). The models with the highest 60-day absolute mortality separation between the clusters for each of the two trials in the training set were then further evaluated. Models 6, 5, and 8 were consistently amongst the models with highest separation (eTable 4). Model 8 was selected for further investigation, as it had the fewest variables (eTable 5).

### Clinical characteristics of each cluster

Based on model 8, only nine clinical and laboratory variables were needed to identify the two distinct clusters in ARDS patients, namely: heart rate, mean arterial pressure, respiratory rate, bilirubin, bicarbonate, creatinine, PaO<sub>2</sub>, arterial pH, and FiO<sub>2</sub>. For each variable in the model, opposing measurements could be observed for each cluster (Figure 1 and eFigure 2). For the ARDSnet trials, the incidence of cluster 1 patients varied from 57.8% (EDEN) to 73.6% (ARMA), and 41.5% of ART patients were part of cluster 1. Across all trials, patients in cluster 2 had higher severity of illness, rate of vasopressor, heart rate, respiratory rate, creatinine, and bilirubin, as well as lower platelets, pH, BUN, and bicarbonate compared to patients in cluster 1 (Table 2, eTables 6 and 7). In addition, 28-, 60-, and 90-day mortality rate was higher in patients in cluster 2 in all trials (Table 3). Likewise, for each trial, the number of ventilator-free days at day 28 was lower in patients in cluster 2 compared to cluster 1, and duration of ventilation in survivors was longer in cluster 1.

|  | FACTT                  |                        |            | EDEN                   |                        |            |
|--|------------------------|------------------------|------------|------------------------|------------------------|------------|
|  | Cluster 1<br>(n = 407) | Cluster 2<br>(n = 294) | p<br>value | Cluster 1<br>(n = 449) | Cluster 2<br>(n = 328) | p<br>value |

|                                                                                                                                      |                     |                    |         |                    |                     |         |
|--------------------------------------------------------------------------------------------------------------------------------------|---------------------|--------------------|---------|--------------------|---------------------|---------|
| Age, year*                                                                                                                           | 50.0 (40.0 - 63.0)  | 47.0 (36.0 - 58.0) | 0.002   | 53.0 (44.0 - 63.0) | 51.0 (41.0 - 62.2)  | 0.183   |
| Male gender - no. (%)                                                                                                                | 223 (54.8)          | 151 (51.4)         | 0.411   | 233 (51.9)         | 168 (51.2)          | 0.910   |
| Body mass index, kg/m <sup>2</sup>                                                                                                   | 27.5 (23.3 - 32.1)  | 27.4 (23.0 - 32.7) | 0.938   | 29.1 (24.6 - 34.5) | 28.5 (23.4 - 35.1)  | 0.476   |
| Caucasian - no. (%)                                                                                                                  | 269 (66.1)          | 177 (60.2)         | 0.129   | 349 (81.5)         | 237 (75.7)          | 0.067   |
| Etiology - no. (%)                                                                                                                   |                     |                    | < 0.001 |                    |                     | 0.003   |
| Pneumonia                                                                                                                            | 201 (49.4)          | 139 (47.3)         |         | 296 (65.9)         | 217 (66.2)          |         |
| Sepsis                                                                                                                               | 78 (19.2)           | 101 (34.4)         |         | 50 (11.1)          | 60 (18.3)           |         |
| Aspiration                                                                                                                           | 67 (16.5)           | 30 (10.2)          |         | 45 (10.0)          | 27 (8.2)            |         |
| Trauma                                                                                                                               | 24 (5.9)            | 8 (2.7)            |         | 24 (5.3)           | 5 (1.5)             |         |
| Other                                                                                                                                | 37 (9.1)            | 16 (5.4)           |         | 34 (7.6)           | 19 (5.8)            |         |
| Prognostic scores                                                                                                                    |                     |                    |         |                    |                     |         |
| APACHE III                                                                                                                           | 69.0 (56.0 - 84.0)  | 91 (76.0 - 105.0)  | < 0.001 | 66.0 (54.0 - 79.0) | 84.0 (71.0 - 100.2) | < 0.001 |
| Use of vasopressor - no. (%)                                                                                                         | 118 (29.5)          | 189 (64.9)         | < 0.001 | 187 (41.6)         | 209 (63.7)          | < 0.001 |
| Vital signs                                                                                                                          |                     |                    |         |                    |                     |         |
| Temperature, °C                                                                                                                      | 37.5 (36.8 - 38.2)  | 37.6 (37.0 - 38.4) | 0.371   | 37.3 (36.8 - 37.8) | 37.3 (36.7 - 38.1)  | 0.212   |
| Heart rate, bpm                                                                                                                      | 95.0 (81.0 - 110.0) | 114 (102 - 126)    | < 0.001 | 89 (77 - 102)      | 101 (89 - 116)      | < 0.001 |
| Mean arterial Pressure, mmHg                                                                                                         | 76.0 (68.0 - 88.0)  | 71.0 (65.0 - 80.8) | < 0.001 | 77.0 (68.0 - 84.0) | 71.0 (66.0 - 80.0)  | < 0.001 |
| SpO <sub>2</sub> , %                                                                                                                 | 96 (93 - 98)        | 95 (92 - 97)       | < 0.001 | 96 (94 - 98)       | 95 (92 - 98)        | 0.032   |
| Urine output in 24 hours, mL                                                                                                         | 1785 (1192 - 2853)  | 1370 (842 - 2446)  | < 0.001 | 1505 (977 - 2250)  | 1165 (566 - 1816)   | < 0.001 |
| Laboratory tests                                                                                                                     |                     |                    |         |                    |                     |         |
| Hematocrit, %                                                                                                                        | 30.0 (26.0 - 33.0)  | 30.0 (24.2 - 35.0) | 0.272   | 30.0 (26.0 - 34.0) | 30.0 (26.0 - 35.0)  | 0.919   |
| White blood cell count, 10 <sup>9</sup> /L                                                                                           | 11.6 (7.3 - 16.3)   | 11.7 (5.6 - 17.9)  | 0.972   | 11.4 (7.7 - 15.5)  | 12.7 (7.7 - 19.0)   | 0.019   |
| Platelets, 10 <sup>9</sup> /L                                                                                                        | 195 (118.5 - 268)   | 158 (87 - 237)     | < 0.001 | 163 (108 - 241)    | 164 (103 - 227)     | 0.552   |
| Creatinine, mg/dL                                                                                                                    | 0.9 (0.7 - 1.3)     | 1.4 (1.0 - 2.0)    | < 0.001 | 1.0 (0.7 - 1.5)    | 1.6 (1.0 - 2.8)     | < 0.001 |
| Bilirubin, mg/dL                                                                                                                     | 0.7 (0.5 - 1.3)     | 0.9 (0.5 - 2.0)    | 0.003   | 0.8 (0.5 - 1.3)    | 0.8 (0.5 - 1.7)     | 0.128   |
| Arterial blood gas                                                                                                                   |                     |                    |         |                    |                     |         |
| pH*                                                                                                                                  | 7.41 (7.36 - 7.45)  | 7.29 (7.23 - 7.35) | < 0.001 | 7.40 (7.35 - 7.44) | 7.30 (7.24 - 7.35)  | < 0.001 |
| PaO <sub>2</sub> , mmHg                                                                                                              | 78 (68 - 100)       | 78 (65 - 99)       | 0.240   | 83 (70 - 107)      | 81 (67 - 107)       | 0.416   |
| PaO <sub>2</sub> / FiO <sub>2</sub>                                                                                                  | 132 (92 - 173)      | 89 (65 - 126)      | < 0.001 | 133 (98 - 193)     | 101 (73 - 162)      | < 0.001 |
| PaCO <sub>2</sub> , mmHg                                                                                                             | 39 (34 - 44)        | 38.5 (33 - 47.9)   | 0.877   | 38 (34 - 44)       | 38 (33 - 46)        | 0.55    |
| Bicarbonate, mmol/L                                                                                                                  | 24.0 (21.0 - 27.0)  | 17.0 (14.0 - 20.0) | < 0.001 | 23.0 (21.0 - 26.0) | 18.5 (15.0 - 21.0)  | < 0.001 |
| Ventilatory variables                                                                                                                |                     |                    |         |                    |                     |         |
| Tidal volume, mL                                                                                                                     | 450 (400 - 530)     | 450 (382 - 500)    | 0.009   | 420 (356 - 487)    | 400 (350 - 450)     | 0.032   |
| Per PBW, mL/kg PBW                                                                                                                   | 7.1 (6.3 - 8.4)     | 7.0 (6.0, 8.0)     | 0.058   | 6.3 (6.0 - 7.5)    | 6.1 (6.0 - 7.3)     | 0.079   |
| Plateau pressure, cmH <sub>2</sub> O                                                                                                 | 25.0 (20.0 - 29.0)  | 28.0 (24.0 - 32.0) | < 0.001 | 23.0 (19.0 - 27.0) | 24.0 (21.0 - 28.0)  | 0.004   |
| PEEP, cmH <sub>2</sub> O                                                                                                             | 8 (5 - 10)          | 10 (8 - 14)        | < 0.001 | 10 (5 - 10)        | 10 (8 - 14)         | < 0.001 |
| Respiratory rate, breaths/min                                                                                                        | 22 (18 - 27)        | 30 (24 - 35)       | < 0.001 | 22 (19 - 26)       | 30 (25 - 35)        | < 0.001 |
| FiO <sub>2</sub>                                                                                                                     | 0.50 (0.40 - 0.70)  | 0.80 (0.60 - 1.00) | < 0.001 | 0.60 (0.45 - 0.70) | 0.80 (0.60 - 1.00)  | < 0.001 |
| Data are mean ± standard deviation, median (quartile 25th - quartile 75th) or N (%)                                                  |                     |                    |         |                    |                     |         |
| Abbreviations: APACHE denotes Acute Physiology and Chronic Health Evaluation, VT/PBW denotes tidal volume per predicted body weight. |                     |                    |         |                    |                     |         |

| <b>Table 3 - Clinical Outcomes According to Clusters in Each Trial</b>                                                                                                                                                                     |                   |                   |                            |                |
|--------------------------------------------------------------------------------------------------------------------------------------------------------------------------------------------------------------------------------------------|-------------------|-------------------|----------------------------|----------------|
|                                                                                                                                                                                                                                            | <b>Cluster 1</b>  | <b>Cluster 2</b>  | <b>Difference (95% CI)</b> | <b>p value</b> |
| <b>Training set</b>                                                                                                                                                                                                                        |                   |                   |                            |                |
| FACTT                                                                                                                                                                                                                                      | n = 407           | n = 294           |                            |                |
| 60-day mortality - no. (%)                                                                                                                                                                                                                 | 94 (23.1)         | 102 (34.7)        | 11.6% (4.9% to 18.3%)      | 0.001          |
| 90-day mortality - no. (%)                                                                                                                                                                                                                 | 103 (25.4)        | 106 (36.3)        | 10.9% (4.1% to 17.8%)      | 0.002          |
| Ventilator-free days at day 28                                                                                                                                                                                                             | 19.0 (0.0 - 24.0) | 10.0 (0.0 - 21.0) | -9.0 (-11.9 to -6.1)       | < 0.001        |
| Duration of ventilation in survivors, days                                                                                                                                                                                                 | 8.0 (4.0 - 13.0)  | 10.0 (7.0 - 19.0) | 2.0 (0.5 to 3.5)           | < 0.001        |
| EDEN                                                                                                                                                                                                                                       | n = 449           | n = 328           |                            |                |
| 60-day mortality - no. (%)                                                                                                                                                                                                                 | 87 (19.4)         | 90 (27.4)         | 8.1% (2.1% to 14.0%)       | 0.010          |
| 90-day mortality - no. (%)                                                                                                                                                                                                                 | 90 (20.0)         | 93 (28.4)         | 8.3% (2.3% to 14.3%)       | 0.009          |
| Ventilator-free days at day 28                                                                                                                                                                                                             | 21.0 (0.0 - 25.0) | 15.0 (0.0 - 22.2) | -6.0 (-8.1 to -3.9)        | < 0.001        |
| Duration of ventilation in survivors, days                                                                                                                                                                                                 | 6.0 (4.0 - 11.0)  | 8.0 (6.0 - 18.0)  | 2.0 (0.9 to 3.1)           | < 0.001        |
| <b>Validation set</b>                                                                                                                                                                                                                      |                   |                   |                            |                |
| ALVEOLI                                                                                                                                                                                                                                    | n = 336           | n = 157           |                            |                |
| 60-day mortality - no. (%)                                                                                                                                                                                                                 | 59 (17.6)         | 68 (43.3)         | 25.8% (17.7% to 33.8%)     | < 0.001        |
| 90-day mortality - no. (%)                                                                                                                                                                                                                 | 60 (18.1)         | 70 (45.5)         | 27.3% (19.2% to 35.5%)     | < 0.001        |
| Ventilator-free days at day 28                                                                                                                                                                                                             | 21.0 (4.8 - 25.0) | 2.0 (0.0 - 19.0)  | -19.0 (-20.8 to -17.2)     | < 0.001        |
| Duration of ventilation in survivors, days                                                                                                                                                                                                 | 7.0 [4.0,13.0]    | 11.0 (6.0 - 22.2) | 4.0 (2.1 to 5.9)           | < 0.001        |
| ARMA                                                                                                                                                                                                                                       | n = 279           | n = 100           |                            |                |
| 60-day mortality - no. (%)                                                                                                                                                                                                                 | 69 (24.8)         | 42 (42.0)         | 17.2% (6.9% to 27.5%)      | 0.002          |
| 90-day mortality - no. (%)                                                                                                                                                                                                                 | 70 (25.5)         | 42 (42.0)         | 16.5% (6.0% to 26.9%)      | 0.003          |
| Ventilator-free days at day 28                                                                                                                                                                                                             | 17.0 (0.0 - 24.0) | 2.0 (0.0 - 19.0)  | -15.0 (-18.6 to -11.4)     | < 0.001        |
| Duration of ventilation in survivors, days                                                                                                                                                                                                 | 7.0 (4.0 - 13.8)  | 11.0 (5.0 - 18.0) | 4.0 (1.5 to 6.5)           | 0.018          |
| SAILS                                                                                                                                                                                                                                      | n = 319           | n = 188           |                            |                |
| 60-day mortality - no. (%)                                                                                                                                                                                                                 | 80 (25.1)         | 60 (31.9)         | 6.8% (-1.2% to 14.9%)      | 0.119          |
| 90-day mortality - no. (%)                                                                                                                                                                                                                 | 81 (25.4)         | 63 (33.5)         | 8.1% (0.0% to 16.3%)       | 0.063          |
| Ventilator-free days at day 28                                                                                                                                                                                                             | 21.0 (0.0 - 25.0) | 16.0 (0.0 - 23.0) | -5.0 (-7.3 to -2.7)        | < 0.001        |
| Duration of ventilation in survivors, days                                                                                                                                                                                                 | 6.0 (3.0 - 10.0)  | 8.0 (5.0 - 14.0)  | 2.0 (0.7 to 3.3)           | < 0.001        |
| ART                                                                                                                                                                                                                                        | n = 211           | n = 298           |                            |                |
| 28-day mortality - no. (%)                                                                                                                                                                                                                 | 81 (38.4)         | 180 (60.4)        | 22.0% (13.4% to 30.7%)     | < 0.001        |
| Ventilator-free days at day 28                                                                                                                                                                                                             | 0.0 (0.0 - 17.0)  | 0.0 (0.0 - 7.8)   | -0.0 (-1.0 to 1.0)         | < 0.001        |
| Duration of ventilation in survivors, days                                                                                                                                                                                                 | 12.0 (8.0 - 20.0) | 13.5 (8.0 - 20.0) | 2.0 (-0.3 to 4.2)          | 0.570          |
| Data are median (quartile 25th - quartile 75th) or N (%). Difference is mean difference with (95% CI) for binomial variables and median difference with (95% CI) for continuous variables<br>Abbreviations: CI is the confidence interval. |                   |                   |                            |                |

## Identification of Subphenotypes

After comparing the clinical characteristics of the clusters, each cluster was assigned to represent a distinct subphenotype of ARDS, with patients in cluster 1 assigned to

1  
2  
3 subphenotype A, and patients in cluster 2 assigned to subphenotype B. Using blood  
4  
5 biomarker information available for a subset of patients from both ARMA and ALVEOLI,  
6  
7 subphenotype B showed increased levels of pro-inflammatory markers when compared  
8  
9  
10 to subphenotype A (**Figure 2** and **eTables 8 and 9**).

11  
12  
13  
14  
15  
16  
17  
18  
19  
20  
21  
22  
23  
24  
25  
26  
27  
28  
29  
30  
31  
32  
33  
34  
35  
36  
37  
38  
39  
40  
41  
42  
43  
44  
45  
46  
47  
48  
49  
50  
51  
52  
53  
54  
55  
56  
57  
58  
59  
60

For peer review only



## DISCUSSION

This study successfully demonstrated that nine easily obtainable clinical variables: arterial pH, partial O<sub>2</sub> pressure, creatinine, bilirubin, bicarbonate, mean arterial pressure, heart rate, respiratory rate, and FiO<sub>2</sub> at the time of study enrollment can identify two distinct ARDS subphenotypes with different clinical and biologic characteristics as well as outcomes across the test and validation cohorts. There was good generalizability amongst diverse populations from multiple validation datasets with temporal and geographical differences.

It is understandable that researchers feel compelled to use as much information as possible to build robust models. This is supportable for two main reasons: (1) the well-known heterogeneity of complex syndromes such as ARDS and (2) the abundance of highly granular clinical data generated by electronic health records (EHRs). It is anticipated that analyzing this vast amount of data will provide new knowledge regarding disease mechanisms by enabling researchers to find plausible hidden patterns within the data [29]. However, this data-heavy approach has the potential drawback of using predictors which are not generally obtained in a time window prior to intervention, or worse yet, using variables that are not part of the routine standard of care for patients. The rationale of using fewer and easy to collect clinical variables is not new in the field of critical care. Prognostic models have already shown that it is indeed feasible to create meaningful models using fewer predictors [30,31].

Our initial choices to define variables commonly found in the EHR at ARDS diagnosis was inspired by a recent report from the World Health Organization (WHO) which showed an enormous discrepancy of medical devices availability in a survey across

1  
2  
3 135 countries [29]. Recognizing this inconsistency is essential for widespread  
4 implementation of machine learning models regardless of varying availability of resources  
5 across countries and health systems [29]. The aim is to provide clinically relevant  
6 information within a defined and short period that might impact the delivery of effective  
7 interventions to the right patient population and to as many patients as possible [29].  
8  
9

10  
11  
12  
13  
14 Recently, Sinha *et al.* developed supervised-learning gradient boosted classifier  
15 models trained using 24 or 14 readily available clinical data elements to reproduce  
16 biomarker-derived subphenotypes which were previously identified by Calfee *et al.* [17].  
17 Unlike Sinha *et al.*, who predicted previously identified subphenotypes, our study has  
18 identified two subphenotypes *de novo* using a small set of clinical variables.  
19  
20  
21  
22  
23  
24  
25

26 Although the subphenotypes that we have identified and those that have been  
27 previously published look similar, our work is distinct from previous studies in several  
28 ways. We employed different training and validation datasets as well as a different and  
29 well-established unsupervised learning technique. Moreover, we utilized a process for  
30 selecting predictors which is not comparable to previous studies. Acknowledging these  
31 differences is crucial. It would not be unexpected to assume that these deviations would  
32 be relevant enough to produce different subphenotypes [32]. However, the clinical,  
33 laboratory characteristics, and the clinical outcomes of our subphenotypes show that they  
34 are remarkably similar to subphenotypes found in previous papers, regardless of  
35 methodological differences.  
36  
37  
38  
39  
40  
41  
42  
43  
44  
45  
46  
47  
48

49 At this point it is not possible to go beyond this comparative analysis, as there is  
50 no gold standard definition of ARDS subphenotypes [32]. Nonetheless, our work does  
51 provide robust evidence that ARDS does indeed have two subphenotypes that can be  
52  
53  
54  
55  
56  
57  
58  
59  
60

1  
2  
3 systematically identified, despite major differences in population assessed and  
4 methodological approach used compared with previous studies. It also reinforces that we  
5 should continue to explore the underlying biological pathways of such subphenotypes to  
6 find responders to new or previously tested therapies.  
7  
8  
9  
10  
11

12 Our study has several strengths. First, it is the largest cohort of patients that has  
13 been studied to develop distinct subphenotypes of ARDS patients. Moreover, our  
14 validation cohort included patients from the ART trial, allowing us to validate our model in  
15 the contemporaneous population of a large international randomized clinical trial in  
16 addition to the ARDSnet studies used in other subphenotyping studies. Second, our  
17 subphenotyping model was developed exclusively on the training set and then validated  
18 across multiple separate datasets. Nevertheless, similar separation in mortality was seen  
19 between the two subphenotypes across all trials. Third, we used the K-means algorithm  
20 to identify our subphenotypes, and the results obtained with this technique can be easily  
21 interpreted by clinicians and implemented in clinical practice. Lastly, this is the first  
22 phenotyping study that has used easily available clinical variables to identify ARDS  
23 phenotypes *de novo*, which allows for early identification of these patients in the clinical  
24 care at the bedside. Using this algorithm with a small number of routinely collected  
25 variables could enable our model to be applied in trials that either retrospectively or  
26 prospectively assess interventions targeted to each subphenotype.  
27  
28  
29  
30  
31  
32  
33  
34  
35  
36  
37  
38  
39  
40  
41  
42  
43  
44  
45  
46

47 This study also has limitations. First, we have developed our models exclusively  
48 on patients enrolled in clinical trials. Due to the strict inclusion and exclusion criteria of  
49 these clinical trials, the generalizability of these results needs to be evaluated in  
50 unselected ARDS populations. Although there are clear clinical and biomarker differences  
51  
52  
53  
54  
55  
56  
57  
58  
59  
60

1  
2  
3 between the identified subphenotypes, the model's clinical utility needs to be  
4 prospectively validated and further investigated. Additionally, our biomarker analysis is  
5 limited to those patients in which the data was made publicly available by the study  
6 authors, but future collection of biomarker data in a prospective study will allow more  
7 robust understanding of the underlying biology and validation of the subphenotype model.  
8 Also, K-means clustering does not handle missing data, and no approach was used to  
9 impute missing values. However, the extremely low rate of missingness in our study  
10 makes this issue less relevant. Lastly, future work should analyze previous trials to  
11 identify possible differential treatment responses for the subphenotypes of ARDS patients  
12 identified in this study.  
13  
14  
15  
16  
17  
18  
19  
20  
21  
22  
23  
24  
25  
26  
27  
28  
29  
30  
31  
32  
33  
34  
35  
36  
37  
38  
39  
40  
41  
42  
43  
44  
45  
46  
47  
48  
49  
50  
51  
52  
53  
54  
55  
56  
57  
58  
59  
60

## CONCLUSIONS

This study confirms the existence of two distinct subphenotypes in ARDS patients using a novel clustering model on routinely collected clinical data. This work may allow for easier identification of ARDS subphenotypes to facilitate implementation of precision clinical trial enrollment and development of targeted therapies in a variety of settings without the added burdens of biomarker evaluation.

For peer review only

## DECLARATIONS

**Funding:** This research received no specific grant from any funding agency in the public, commercial or not-for-profit sectors.

**Competing Interest:** AD, MS, FGZ, ABC, ISM, DMP, LNL declare no relevant financial conflicts of interest. RK, EVA, LB, JO, DR and ROD are employees of Endpoint Health, Inc. ASN reported receiving personal fees from Dräger unrelated to the submitted work.

**Ethics Approval:** All patients provided informed consent in the original trials. This secondary analysis study was exempt from IRB review because it does not meet the definition of human subject as defined in 45 CFR 46.102. WIRB Work Order #1-1228617-1

**Availability of data and material:** Data from the ARDSnet studies (EDEN, FACTT, ARMA, ALVEOLI) is publicly available from the NHLBI ARDS Network (NHLBI ARDS Network) and data from the ART trial can be requested from study authors.

**Author Contributions:** AD, RK, EVA, LB participated in study design and analysis, drafted, and revised the manuscript, and are the guarantor of the document. MS, DR, JO, FGZ, ABC, ISM, DMP, LNL, and ASN participated in interpretation of data analysis, drafted the manuscript, and revised it for critically important intellectual content. ROD participated in the study design, analysis, interpretation of data analysis, and final revision of the manuscript content.

**Twitter:** @msiuba, @f\_g\_zampieri, @rod\_deliberato, @a\_serpaneto, @l\_bulgarelli, @endpointhealth

## REFERENCES

- 1 ARDS Definition Task Force, Ranieri VM, Rubenfeld GD, *et al.* Acute respiratory distress syndrome: the Berlin Definition. *JAMA* 2012;**307**:2526–33. doi:10.1001/jama.2012.5669
- 2 Thille AW, Esteban A, Fernández-Segoviano P, *et al.* Comparison of the Berlin Definition for Acute Respiratory Distress Syndrome with Autopsy. *Am J Respir Crit Care Med* 2013;**187**:761–7. doi:10.1164/rccm.201211-1981OC
- 3 Reilly J, Calfee C, Christie J. Acute Respiratory Distress Syndrome Phenotypes. *Semin Respir Crit Care Med* 2019;**40**:019–30. doi:10.1055/s-0039-1684049
- 4 Reddy K, Sinha P, O’Kane CM, *et al.* Subphenotypes in critical care: translation into clinical practice. *The Lancet Respiratory Medicine* 2020;**8**:631–43. doi:10.1016/S2213-2600(20)30124-7
- 5 Shankar-Hari M, Fan E, Ferguson ND. Acute respiratory distress syndrome (ARDS) phenotyping. *Intensive Care Med* 2019;**45**:516–9. doi:10.1007/s00134-018-5480-6
- 6 Calfee CS, Delucchi K, Parsons PE, *et al.* Subphenotypes in acute respiratory distress syndrome: latent class analysis of data from two randomised controlled trials. *The Lancet Respiratory Medicine* 2014;**2**:611–20. doi:10.1016/S2213-2600(14)70097-9
- 7 Famous KR, Delucchi K, Ware LB, *et al.* Acute Respiratory Distress Syndrome Subphenotypes Respond Differently to Randomized Fluid Management Strategy. *Am J Respir Crit Care Med* 2017;**195**:331–8. doi:10.1164/rccm.201603-0645OC
- 8 Calfee CS, Delucchi KL, Sinha P, *et al.* Acute respiratory distress syndrome subphenotypes and differential response to simvastatin: secondary analysis of a randomised controlled trial. *The Lancet Respiratory Medicine* 2018;**6**:691–8. doi:10.1016/S2213-2600(18)30177-2
- 9 for the NHLBI ARDS Network, Sinha P, Delucchi KL, *et al.* Latent class analysis of ARDS subphenotypes: a secondary analysis of the statins for acutely injured lungs from sepsis (SAILS) study. *Intensive Care Med* 2018;**44**:1859–69. doi:10.1007/s00134-018-5378-3
- 10 Bos LD, Schouten LR, van Vught LA, *et al.* Identification and validation of distinct biological phenotypes in patients with acute respiratory distress syndrome by cluster analysis. *Thorax* 2017;**72**:876–83. doi:10.1136/thoraxjnl-2016-209719
- 11 Ferguson ND, Fan E, Camporota L, *et al.* The Berlin definition of ARDS: an expanded rationale, justification, and supplementary material. *Intensive Care Med* 2012;**38**:1573–82. doi:10.1007/s00134-012-2682-1

- 12 Bellani G, Laffey JG, Pham T, *et al*. Epidemiology, Patterns of Care, and Mortality for Patients With Acute Respiratory Distress Syndrome in Intensive Care Units in 50 Countries. *JAMA* 2016;**315**:788. doi:10.1001/jama.2016.0291
- 13 Gattinoni L, Vassalli F, Romitti F. Benefits and risks of the P/F approach. *Intensive Care Med* 2018;**44**:2245–7. doi:10.1007/s00134-018-5413-4
- 14 Matthay MA, Arabi YM, Siegel ER, *et al*. Phenotypes and personalized medicine in the acute respiratory distress syndrome. *Intensive Care Med* 2020;**46**:2136–52. doi:10.1007/s00134-020-06296-9
- 15 Shankar-Hari M, Rubenfeld GD. Population enrichment for critical care trials: phenotypes and differential outcomes. *Current Opinion in Critical Care* 2019;**25**:489–97. doi:10.1097/MCC.0000000000000641
- 16 Sinha P, Delucchi KL, McAuley DF, *et al*. Development and validation of parsimonious algorithms to classify acute respiratory distress syndrome phenotypes: a secondary analysis of randomised controlled trials. *The Lancet Respiratory Medicine* 2020;**8**:247–57. doi:10.1016/S2213-2600(19)30369-8
- 17 Sinha P, Churpek MM, Calfee CS. Machine Learning Classifier Models Can Identify Acute Respiratory Distress Syndrome Phenotypes Using Readily Available Clinical Data. *Am J Respir Crit Care Med* 2020;**202**:996–1004. doi:10.1164/rccm.202002-0347OC
- 18 Kitsios GD, Yang L, Manatakis DV, *et al*. Host-Response Subphenotypes Offer Prognostic Enrichment in Patients With or at Risk for Acute Respiratory Distress Syndrome\*: *Critical Care Medicine* 2019;**47**:1724–34. doi:10.1097/CCM.0000000000004018
- 19 The National Heart, Lung, and Blood Institute Acute Respiratory Distress Syndrome (ARDS) Clinical Trials Network. Ventilation with Lower Tidal Volumes as Compared with Traditional Tidal Volumes for Acute Lung Injury and the Acute Respiratory Distress Syndrome. *N Engl J Med* 2000;**342**:1301–8. doi:10.1056/NEJM200005043421801
- 20 The National Heart, Lung, and Blood Institute Acute Respiratory Distress Syndrome (ARDS) Clinical Trials Network. Higher versus Lower Positive End-Expiratory Pressures in Patients with the Acute Respiratory Distress Syndrome. *N Engl J Med* 2004;**351**:327–36. doi:10.1056/NEJMoa032193
- 21 The National Heart, Lung, and Blood Institute Acute Respiratory Distress Syndrome (ARDS) Clinical Trials Network. Pulmonary-Artery versus Central Venous Catheter to Guide Treatment of Acute Lung Injury. *N Engl J Med* 2006;**354**:2213–24. doi:10.1056/NEJMoa061895
- 22 The National Heart, Lung, and Blood Institute Acute Respiratory Distress Syndrome (ARDS) Clinical Trials Network, Rice TW, Wheeler AP, *et al*. Initial Trophic vs Full



- 1  
2  
3 Enteral Feeding in Patients With Acute Lung Injury: The EDEN Randomized Trial.  
4 *JAMA: The Journal of the American Medical Association* 2012;**307**:795–803.  
5 doi:10.1001/jama.2012.137  
6
- 7  
8 23 The National Heart, Lung, and Blood Institute ARDS Clinical Trials Network.  
9 Rosuvastatin for Sepsis-Associated Acute Respiratory Distress Syndrome. *N Engl J*  
10 *Med* 2014;**370**:2191–200. doi:10.1056/NEJMoa1401520  
11
- 12 24 Writing Group for the Alveolar Recruitment for Acute Respiratory Distress Syndrome  
13 Trial (ART) Investigators, Cavalcanti AB, Suzumura ÉA, *et al.* Effect of Lung  
14 Recruitment and Titrated Positive End-Expiratory Pressure (PEEP) vs Low PEEP on  
15 Mortality in Patients With Acute Respiratory Distress Syndrome: A Randomized  
16 Clinical Trial. *JAMA* 2017;**318**:1335. doi:10.1001/jama.2017.14171  
17
- 18  
19 25 Yehya N, Harhay MO, Curley MAQ, *et al.* Reappraisal of Ventilator-Free Days in  
20 Critical Care Research. *Am J Respir Crit Care Med* 2019;**200**:828–36.  
21 doi:10.1164/rccm.201810-2050CP  
22
- 23 26 Castela Forte J, Perner A, van der Horst ICC. The use of clustering algorithms in  
24 critical care research to unravel patient heterogeneity. *Intensive Care Med*  
25 2019;**45**:1025–8. doi:10.1007/s00134-019-05631-z  
26
- 27  
28 27 Ketchen DJ, Shook CL. The Application of Cluster Analysis in Strategic  
29 Management Research: An Analysis and Critique. *Strategic Management Journal*  
30 1996;**17**:441–58. doi:https://doi.org/10.1002/(SICI)1097-  
31 0266(199606)17:6<441::AID-SMJ819>3.0.CO;2-G  
32
- 33 28 Caliński T, Harabasz J. A dendrite method for cluster analysis. *Communications in*  
34 *Statistics* 1974;**3**:1–27. doi:10.1080/03610927408827101  
35
- 36  
37 29 Bulgarelli L, Deliberato RO, Johnson AEW. Prediction on critically ill patients: The  
38 role of “big data.” *Journal of Critical Care* 2020;**60**:64–8.  
39 doi:10.1016/j.jcrc.2020.07.017  
40
- 41 30 Johnson AEW, Kramer AA, Clifford GD. A New Severity of Illness Scale Using a  
42 Subset of Acute Physiology and Chronic Health Evaluation Data Elements Shows  
43 Comparable Predictive Accuracy\*: *Critical Care Medicine* 2013;**41**:1711–8.  
44 doi:10.1097/CCM.0b013e31828a24fe  
45
- 46  
47 31 Deliberato RO, Escudero GG, Bulgarelli L, *et al.* SEVERITAS: An externally  
48 validated mortality prediction for critically ill patients in low and middle-income  
49 countries. *International Journal of Medical Informatics* 2019;**131**:103959.  
50 doi:10.1016/j.ijmedinf.2019.103959  
51
- 52 32 DeMerle KM, Angus DC, Baillie JK, *et al.* Sepsis Subclasses: A Framework for  
53 Development and Interpretation. *Crit Care Med* Published Online First: 15 February  
54 2021. doi:10.1097/CCM.0000000000004842  
55  
56  
57  
58  
59  
60

## FIGURES LEGENDS

### **Figure 1 - Differences of the Variables Included in the Cluster Algorithm Among Clusters**

Square symbols represent the study with the highest mean z score for each phenotype; Circles represent the study with the lowest mean z score for each phenotype. The colored bands are exclusively to help visualize the opposite trends of the variables on the different clusters; Art.pH: arterial pH; Bicarb: bicarbonate; MAP: mean arterial pressure; Creat: creatinine; Resp.Rate: respiratory rate

### **Figure 2 - Heat Map of the Biomarkers Available for the ARMA and ALVEOLI Trials**

For better visualization and due to difference in scales, the values were log-normalized and z-scored. Subphenotypes A and B are shown separately to highlight their differences.

1  
2  
3  
4  
5  
6  
7  
8  
9  
10  
11  
12  
13  
14  
15  
16  
17  
18  
19  
20  
21  
22  
23  
24  
25  
26  
27  
28  
29  
30  
31  
32  
33  
34  
35  
36  
37  
38  
39  
40  
41  
42  
43  
44  
45  
46  
47  
48  
49  
50  
51  
52  
53  
54  
55  
56  
57  
58  
59  
60

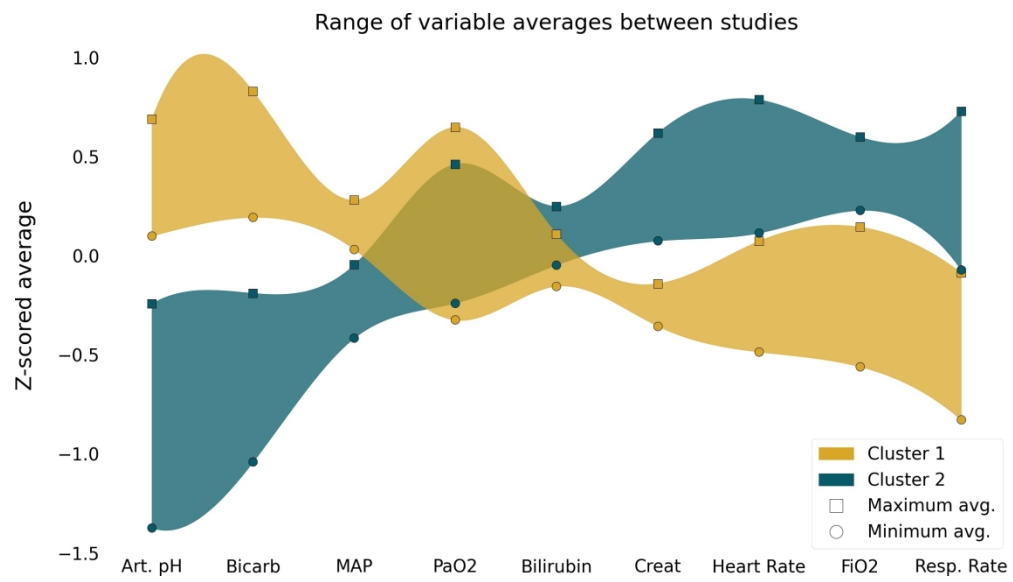

Figure 1 - Differences of the Variables Included in the Cluster Algorithm Among Clusters  
812x457mm (72 x 72 DPI)

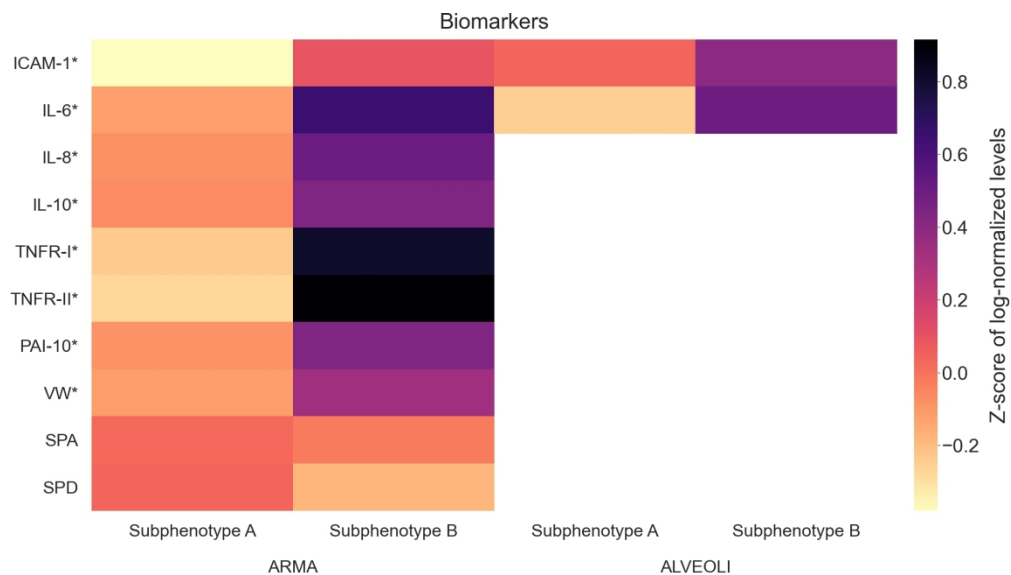

Figure 2 - Heat Map of the Biomarkers Available for the ARMA and ALVEOLI Trials

812x457mm (72 x 72 DPI)

1  
2  
3  
4  
5  
6  
7  
8  
9 **Identification of Acute Respiratory Distress**  
10 **Syndrome subphenotypes de novo using routine**  
11 **clinical data: a retrospective analysis of ARDS**  
12 **clinical trials**  
13  
14  
15  
16  
17  
18  
19  
20  
21  
22  
23  
24  
25  
26  
27  
28  
29  
30  
31  
32  
33  
34  
35  
36  
37  
38  
39  
40  
41  
42  
43  
44  
45  
46  
47  
48  
49  
50  
51  
52  
53  
54  
55  
56  
57  
58  
59  
60

ONLINE SUPPLEMENT

## Additional Methods

### *Number of clusters*

The optimal number of clusters was chosen according to two criteria: (1) Elbow method, by selecting a number of clusters that if further increased will result in only a small increase in performance and possibly cause overfit, hence this number is commonly referenced as to being in the “elbow” of the curve (**eFigure 1**); and (2) Calinski-Harabasz index, consisting of the ratio of *within* to *between* cluster dispersion; higher scores are indication of dense and well separated clusters (**e-Figure 1**).

### *Ventilator-free days*

Ventilator free days for ALVEOLI, EDEN, FACTT, and SAILS were calculated according to the methods outlined by Yehya et al (1). Briefly, patients who died at any time in the 28 days were assigned 0 ventilator-free days. For survivors, the number of ventilator-free days was calculated based on the date of the final successful extubation; reintubations before the final extubation were not counted toward ventilator-free days. All days after a patient was discharged home up to the 28<sup>th</sup> day with unassisted breathing were assumed to be ventilator-free days.

**eTable 1 - Percentage of missing data in the routinely collected variables, closest randomization, on EDEN and FACTT trials.**

|                                  | <b>EDEN<br/>(n = 1000)</b> | <b>FACTT<br/>(n = 999)</b> |
|----------------------------------|----------------------------|----------------------------|
| Age                              | 0.0                        | 0.0                        |
| Gender                           | 0.0                        | 0.0                        |
| Arterial pH                      | 2.8                        | 3.9                        |
| Bicarbonate                      | 0.2                        | 1.5                        |
| Bilirubin                        | 8.1                        | 26.8                       |
| Creatinine                       | 0.0                        | 0.0                        |
| FiO <sub>2</sub>                 | 0.8                        | 0.6                        |
| Heart Rate                       | 0.0                        | 0.1                        |
| Height                           | 0.1                        | 0.9                        |
| Mean Arterial Pressure           | 12.1                       | 0.8                        |
| PaCO <sub>2</sub>                | 2.8                        | 3.9                        |
| PaO <sub>2</sub>                 | 0.2                        | 4.0                        |
| Positive end-expiratory pressure | 1.0                        | 0.3                        |
| Platelets                        | 8.1                        | 6.0                        |
| Plateau pressure                 | 32.3                       | 30.9                       |
| Respiratory rate                 | 0.6                        | 0.4                        |
| Tidal volume                     | 15.3                       | 12.1                       |
| Tidal volume per PBW             | 15.4                       | 12.8                       |

**eTable 2 - Plausible physiological ranges for clinical measurements, closest to time of randomization**

| Variables                              | Lower Limit | Upper Limit |
|----------------------------------------|-------------|-------------|
| Age (years)                            | 16          | 89          |
| Arterial pH                            | 6.65        | 7.80        |
| Bicarbonate (mEq/L)                    | 1           | 50          |
| Bilirubin (mg/dL)                      | 0.1         | 50          |
| Creatinine (mg/dL)                     | 0.1         | 20          |
| FiO <sub>2</sub>                       | 0.21        | 1           |
| Heart Rate (beats per minute)          | 20          | 300         |
| Height (cm)                            | 120         | 220         |
| Mean arterial pressure (mmHg)          | 10          | 400         |
| PaCO <sub>2</sub> (mmHg)               | 20          | 120         |
| PaO <sub>2</sub> / FiO <sub>2</sub>    | 0           | 500         |
| PaO <sub>2</sub> (mmHg)                | 30          | 500         |
| PEEP (cm H <sub>2</sub> O)             | 0           | 60          |
| Platelets (thousands)                  | 1           | 1000        |
| Plateau Pressure (cm H <sub>2</sub> O) | 10          | 50          |
| Respiratory Rate (resp per minute)     | 1           | 100         |
| Tidal Volume (cm H <sub>2</sub> O)     | 100         | 1400        |



**eTable 3 - Correlation among fifteen routinely collected variables, close to the time of randomization.**

|                     | Age   | pH    | HCO <sub>3</sub> | Bili  | Creat | FiO <sub>2</sub> | Gender | HR    | MAP   | PaCO <sub>2</sub> | PaO <sub>2</sub> | PEEP  | Plat  | RR    | V <sub>T</sub> /PBW |
|---------------------|-------|-------|------------------|-------|-------|------------------|--------|-------|-------|-------------------|------------------|-------|-------|-------|---------------------|
| Age                 | 1.00  | 0.06  | -0.04            | -0.02 | 0.11  | -0.13            | 0.00   | -0.27 | -0.12 | -0.11             | -0.06            | -0.22 | 0.00  | -0.11 | 0.03                |
| pH                  | 0.06  | 1.00  | 0.40             | -0.04 | -0.16 | -0.26            | -0.01  | -0.18 | 0.15  | -0.39             | 0.00             | -0.20 | 0.05  | -0.21 | 0.07                |
| HCO <sub>3</sub>    | -0.04 | 0.40  | 1.00             | -0.08 | -0.28 | -0.05            | -0.02  | -0.18 | 0.08  | 0.44              | 0.02             | -0.05 | 0.15  | -0.24 | -0.07               |
| Bili                | -0.02 | -0.04 | -0.08            | 1.00  | 0.06  | -0.03            | -0.04  | 0.01  | -0.04 | -0.01             | 0.03             | 0.01  | -0.20 | 0.04  | -0.01               |
| Creat               | 0.11  | -0.16 | -0.28            | 0.06  | 1.00  | -0.04            | -0.08  | -0.04 | -0.01 | -0.14             | 0.00             | -0.06 | -0.12 | 0.02  | 0.00                |
| FiO <sub>2</sub>    | -0.13 | -0.26 | -0.05            | -0.03 | -0.04 | 1.00             | 0.03   | 0.13  | -0.06 | 0.18              | 0.11             | 0.49  | 0.06  | 0.21  | -0.02               |
| Gender              | 0.00  | -0.01 | -0.02            | -0.04 | -0.08 | 0.03             | 1.00   | -0.03 | -0.05 | -0.04             | -0.06            | 0.02  | 0.09  | 0.09  | 0.19                |
| HR                  | -0.27 | -0.18 | -0.18            | 0.01  | -0.04 | 0.13             | -0.03  | 1.00  | -0.02 | 0.03              | -0.04            | 0.12  | -0.05 | 0.22  | 0.08                |
| MAP                 | -0.12 | 0.15  | 0.08             | -0.04 | -0.01 | -0.06            | -0.05  | -0.02 | 1.00  | -0.03             | 0.01             | -0.01 | 0.06  | -0.04 | 0.00                |
| PaCO <sub>2</sub>   | -0.11 | -0.39 | 0.44             | -0.01 | -0.14 | 0.18             | -0.04  | 0.03  | -0.03 | 1.00              | -0.04            | 0.17  | 0.11  | -0.05 | -0.17               |
| PaO <sub>2</sub>    | -0.06 | 0.00  | 0.02             | 0.03  | 0.00  | 0.11             | -0.06  | -0.04 | 0.01  | -0.04             | 1.00             | -0.09 | -0.04 | -0.09 | 0.03                |
| PEEP                | -0.22 | -0.20 | -0.05            | 0.01  | -0.06 | 0.49             | 0.02   | 0.12  | -0.01 | 0.17              | -0.09            | 1.00  | 0.00  | 0.33  | -0.15               |
| Plat                | 0.00  | 0.05  | 0.15             | -0.20 | -0.12 | 0.06             | 0.09   | -0.05 | 0.06  | 0.11              | -0.04            | 0.00  | 1.00  | -0.05 | 0.03                |
| RR                  | -0.11 | -0.21 | -0.24            | 0.04  | 0.02  | 0.21             | 0.09   | 0.22  | -0.04 | -0.05             | -0.09            | 0.33  | -0.05 | 1.00  | -0.31               |
| V <sub>T</sub> /PBW | 0.03  | 0.07  | -0.07            | -0.01 | 0.00  | -0.02            | 0.19   | 0.08  | 0.00  | -0.17             | 0.03             | -0.15 | 0.03  | -0.31 | 1.00                |

Data are Pearson correlation coefficients.

Abbreviations: Bili denotes bilirubin, Creat is creatinine, HR is heart rate, MAP is mean arterial pressure, PEEP is positive end-expiratory pressure, Plat is platelets, RR is respiratory rate and V<sub>T</sub>/PBW is tidal volume per predicted body weight.

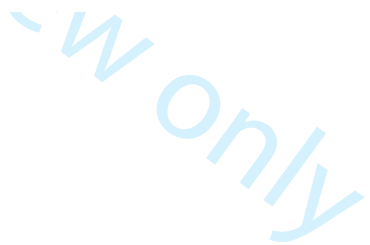

**eTable 4 - Absolute 60-day Mortality Difference Among Clusters per Trial and Model**

| FACTT trial<br>(n = 998) |                  |                                     | EDEN trial<br>(n = 1000) |                  |                                     |
|--------------------------|------------------|-------------------------------------|--------------------------|------------------|-------------------------------------|
| Model                    | Patients scored* | Mortality difference among clusters | Model                    | Patients scored* | Mortality difference among clusters |
| 6                        | 93.5%            | 13.1%                               | 7                        | 77.7%            | 8.1%                                |
| 2                        | 57.4%            | 12.5%                               | 8                        | 77.7%            | 8.1%                                |
| 5                        | 65.5%            | 12.2%                               | 6                        | 84.1%            | 6.7%                                |
| 8                        | 70.2%            | 11.6%                               | 5                        | 71.7%            | 6.5%                                |
| 7                        | 70.2%            | 11.4%                               | 9                        | 84.7%            | 6.1%                                |
| 1                        | 57.4%            | 11.2%                               | 3                        | 77.7%            | 4.4%                                |
| 4                        | 70.2%            | 10.6%                               | 4                        | 77.7%            | 4.0%                                |
| 9                        | 93.5%            | 10.4%                               | 2                        | 57.7%            | 3.9%                                |
| 3                        | 70.2%            | 10.1%                               | 10                       | 87.3%            | 2.8%                                |
| 10                       | 98.8%            | 3.9%                                | 1                        | 57.7%            | 0.1%                                |

\* Number of patients without any missing data, allowing their assignment to one of the clusters.

**eTable 5 - List of variables in each model assessed**

| Model | Demographics |        | Arterial Blood Gases |                  |                   | Laboratory Values |      |                  |      | Vital Signs |    |    | Ventilator Variables |      |                     |
|-------|--------------|--------|----------------------|------------------|-------------------|-------------------|------|------------------|------|-------------|----|----|----------------------|------|---------------------|
|       | Age          | Gender | pH                   | PaO <sub>2</sub> | PaCO <sub>2</sub> | Creat             | Bili | HCO <sub>3</sub> | Plat | MAP         | RR | HR | FiO <sub>2</sub>     | PEEP | V <sub>T</sub> /PBW |
| 1     | X            | X      | X                    | X                | X                 | X                 | X    | X                | X    | X           | X  | X  | X                    | X    | X                   |
| 2     |              |        | X                    | X                | X                 | X                 | X    | X                | X    | X           | X  | X  | X                    | X    | X                   |
| 3     | X            | X      | X                    | X                | X                 | X                 | X    | X                |      | X           | X  | X  | X                    |      |                     |
| 4     | X            | X      | X                    | X                |                   | X                 | X    | X                |      | X           | X  | X  | X                    |      |                     |
| 5     |              |        | X                    | X                | X                 | X                 | X    | X                | X    | X           | X  | X  | X                    |      |                     |
| 6     | X            | X      | X                    | X                |                   | X                 |      | X                |      | X           | X  | X  | X                    |      |                     |
| 7     |              |        | X                    | X                | X                 | X                 | X    | X                |      | X           | X  | X  | X                    |      |                     |
| 8     |              |        | X                    | X                |                   | X                 | X    | X                |      | X           | X  | X  | X                    |      |                     |
| 9     |              |        | X                    | X                | X                 |                   |      | X                |      | X           | X  | X  |                      |      |                     |
| 10    | X            | X      |                      |                  |                   |                   |      |                  |      | X           | X  | X  |                      |      |                     |

Abbreviations: Bili denotes bilirubin, Creat is creatinine, HR is heart rate, MAP is mean arterial pressure, PEEP is positive end-expiratory pressure, Plat is platelets, RR is respiratory rate and V<sub>T</sub>/PBW is tidal volume per predicted body weight.

For peer review only

**eTable 6 - Baseline Characteristics and Clinical Outcomes According to the Clusters and Two Trials in the Validation Set**

|                                            | ALVEOLI                |                        |         | ARMA                   |                        |         |
|--------------------------------------------|------------------------|------------------------|---------|------------------------|------------------------|---------|
|                                            | Cluster 1<br>(n = 336) | Cluster 2<br>(n = 157) | p value | Cluster 1<br>(n = 279) | Cluster 2<br>(n = 100) | p value |
| Age, year*                                 | 53.0 (39.0 - 66.2)     | 46.0 (37.0 - 60.0)     | 0.007   | 49.0 (37.0 - 64.0)     | 47.5 (36.0 - 61.0)     | 0.180   |
| Male gender - no. (%)                      | 188 (56.0)             | 86 (54.8)              | 0.883   | 169 (60.6)             | 61 (61.0)              | 0.965   |
| Body mass index, kg/m <sup>2</sup>         | 27.0 (22.9 - 31.1)     | 25.2 (21.7 - 30.2)     | 0.050   | 25.8 (23.0 - 30.2)     | 24.4 (21.5 - 29.7)     | 0.057   |
| Caucasian - no. (%)                        | 263 (78.3)             | 102 (65.0)             | 0.002   | 220 (78.9)             | 65 (65.0)              | 0.009   |
| Etiology - no. (%)                         |                        |                        | 0.001   |                        |                        | < 0.001 |
| Pneumonia                                  | 130 (38.7)             | 66 (42.0)              |         | 83 (29.7)              | 30 (30.0)              |         |
| Sepsis                                     | 63 (18.8)              | 50 (31.8)              |         | 64 (22.9)              | 43 (43.0)              |         |
| Aspiration                                 | 55 (16.4)              | 19 (12.1)              |         | 44 (15.8)              | 14 (14.0)              |         |
| Trauma                                     | 33 (9.8)               | 5 (3.2)                |         | 43 (15.4)              | 4 (4.0)                |         |
| Other                                      | 55 (16.4)              | 17 (10.8)              |         | 45 (16.1)              | 9 (9.0)                |         |
| Prognostic scores                          |                        |                        |         |                        |                        |         |
| APACHE III                                 | 71. (59.0 - 83.0)      | 93.0 (80.0 - 110.0)    | < 0.001 | 77.0 (66.0 - 90.5)     | 97.0 (81.8 (110.0)     | < 0.001 |
| Use of vasopressor - no. (%)               | 65 (20.1)              | 80 (51.3)              | < 0.001 | 77 (27.6)              | 52 (52.5)              | < 0.001 |
| Vital signs                                |                        |                        |         |                        |                        |         |
| Temperature, °C                            | 37.6 (37.1 - 38.2)     | 37.7 (36.9 - 38.3)     | 0.778   | 37.6 (37.1 - 38.1)     | 37.6 (36.8 - 38.4)     | 0.803   |
| Heart rate, bpm                            | 97.5 (83.0 - 109)      | 111.0 (97.0 - 126)     | < 0.001 | 101.0 (89.0 - 112.5)   | 118 (105.0 - 128.0)    | < 0.001 |
| Mean arterial Pressure, mmHg               | 77.3 (77.0 - 87.3)     | 73.3 (65.0 - 80.3)     | < 0.001 | 78.0 (70.7 - 88.0)     | 70.5 (64.9 - 80.4)     | < 0.001 |
| SpO <sub>2</sub> , %                       | 96 (94 - 97)           | 95 (92 - 97)           | 0.005   | 95 (93 - 98)           | 95.5 (93 - 97)         | 0.799   |
| Urine output in 24 hours, mL               | 2065 (1355 - 3255)     | 1433 (569 - 2189)      | < 0.001 | 2100 (1375 - 3096)     | 1525 (816 - 2650)      | 0.001   |
| Laboratory tests                           |                        |                        |         |                        |                        |         |
| Hematocrit, %                              | 31.0 (28.0 - 34.0)     | 31.0 (27.0 - 35.0)     | 0.617   | 30.0 (28.0 - 33.0)     | 31.0 (28.0 - 34.0)     | 0.299   |
| White blood cell count, 10 <sup>9</sup> /L | 11.7 (8.1 - 15.3)      | 10.7 (6.4 - 15.8)      | 0.166   | 11.9 (7.7 - 16.7)      | 9.8 (5.4 - 16.7)       | 0.057   |
| Platelets, 10 <sup>9</sup> /L              | 173 (94 - 266)         | 141 (57 - 214)         | 0.001   | 139 (80 - 212)         | 125 (72 - 196)         | 0.260   |
| Creatinine, mg/dL                          | 0.9 (0.7 - 1.3)        | 1.5 (0.9 - 3.0)        | < 0.001 | 1.0 (0.7 - 1.4)        | 1.8 (1.2 - 3.2)        | < 0.001 |
| Bilirubin, mg/dL                           | 0.8 (0.5 - 1.4)        | 0.9 (0.4 - 1.8)        | 0.289   | 1.0 (0.6 - 2.1)        | 1.1 (0.7 - 2.7)        | 0.106   |
| Arterial blood gas                         |                        |                        |         |                        |                        |         |
| pH*                                        | 7.42 (7.38 - 7.45)     | 7.31 (7.24 - 7.36)     | < 0.001 | 7.42 (7.38 - 7.47)     | 7.33 (7.28 - 7.37)     | < 0.001 |
| PaO <sub>2</sub> , mmHg                    | 78 (68 - 93)           | 74 (65 - 92)           | 0.082   | 75 (66 - 91)           | 81 (68 - 96)           | 0.106   |
| PaO <sub>2</sub> / FiO <sub>2</sub>        | 149 (109 - 192)        | 103 (74 - 136)         | < 0.001 | 118 (83 - 160)         | 99 (68 - 137)          | 0.006   |

|   |                                      |                    |                    |         |                    |                    |         |
|---|--------------------------------------|--------------------|--------------------|---------|--------------------|--------------------|---------|
| 1 | PaCO <sub>2</sub> , mmHg             | 38 (34 - 43)       | 36 (31 - 42)       | 0.046   | 37 (31 - 41)       | 34 (28.8 - 39.2)   | 0.003   |
| 2 | Bicarbonate, mmol/L                  | 24 (21 - 27)       | 17 (13 - 20)       | < 0.001 | 23 (20 - 26)       | 16 (13 - 19)       | < 0.001 |
| 3 | Ventilatory variables                |                    |                    |         |                    |                    |         |
| 4 | Tidal volume, mL                     | 500 (437 - 600)    | 480 (400 - 572)    | 0.002   | 700 (600 - 750)    | 700 (550 - 700)    | 0.198   |
| 5 | Per PBW, mL/kg PBW                   | 8.0 (6.9 - 9.5)    | 7.4 (6.2 - 9.2)    | 0.006   | 10.1 (9.2 - 11.1)  | 10.6 (9.0 - 11.4)  | 0.383   |
| 6 | Plateau pressure, cmH <sub>2</sub> O | 25.0 (21.0 - 30.0) | 29.0 (24.0 - 33.0) | < 0.001 | 29.0 (24.0 - 34.0) | 31.0 (27.0 - 36.0) | 0.018   |
| 7 | PEEP, cmH <sub>2</sub> O             | 10 (5 - 10)        | 10 (8 - 14)        | < 0.001 | 8 (5 - 10)         | 10 (5 - 12)        | 0.150   |
| 8 | Respiratory rate, breaths/min        | 20 (15 - 25)       | 30 (24 - 35)       | < 0.001 | 18 (14 - 21)       | 24 (18.8 - 28)     | < 0.001 |
| 9 | FiO <sub>2</sub>                     | 0.50 (0.44 - 0.65) | 0.75 (0.60 - 1.00) | < 0.001 | 0.60 (0.50 - 0.70) | 0.70 (0.59 - 0.96) | < 0.001 |

12 Data are mean ± standard deviation, median (quartile 25<sup>th</sup> - quartile 75<sup>th</sup>) or N (%)  
 13 Abbreviations: APACHE denotes Acute Physiology and Chronic Health Evaluation, V<sub>T</sub>/PBW denotes tidal volume per predicted body weight.

For peer review only

**eTable 7 - Baseline Characteristics and Clinical Outcomes According to the Clusters and Two Trials in the Validation Set**

|                                            | SAILS                  |                        |         | ART                    |                        |         |
|--------------------------------------------|------------------------|------------------------|---------|------------------------|------------------------|---------|
|                                            | Cluster 1<br>(n = 319) | Cluster 2<br>(n = 188) | p value | Cluster 1<br>(n = 211) | Cluster 2<br>(n = 298) | p value |
| Age, year*                                 | 57.0 (46.0 - 67.0)     | 53.5 (39.0 - 65.0)     | 0.035   | 54.0 (37.0 - 65.0)     | 50.0 (35.2 - 61.0)     | 0.075   |
| Male gender - no. (%)                      | 150 (47.0)             | 100 (53.2)             | 0.211   | 136 (64.5)             | 181 (60.7)             | 0.448   |
| Body mass index, kg/m <sup>2</sup>         | 28.5 (23.9 - 34.6)     | 29.8 (23.2 - 35.1)     | 0.903   | 28.8 (24.6 - 35.6)     | 28.4 (25.0 - 31.7)     | 0.367   |
| Caucasian - no. (%)                        | 250 (78.4)             | 140 (74.5)             | 0.369   | ---                    | ---                    | ---     |
| Etiology - no. (%)                         |                        |                        | 0.709   |                        |                        | 0.052   |
| Pneumonia                                  | 228 (71.5)             | 127 (67.6)             |         | 113 (53.6)             | 171 (57.4)             |         |
| Sepsis                                     | 63 (19.7)              | 39 (20.7)              |         | 38 (18.0)              | 59 (19.8)              |         |
| Aspiration                                 | 19 (6.0)               | 15 (8.0)               |         | 13 (6.2)               | 16 (5.4)               |         |
| Trauma                                     | 3 (0.9)                | 1 (0.5)                |         | 10 (4.7)               | 2 (0.7)                |         |
| Other                                      | 6 (1.9)                | 6 (3.2)                |         | 37 (17.5)              | 50 (16.8)              |         |
| Prognostic scores                          |                        |                        |         | ---                    | ---                    | ---     |
| APACHE III                                 | 70.0 (56.0 - 84.0)     | 92.0 (75.0 - 105.8)    | < 0.001 |                        |                        |         |
| SAPS III                                   | ---                    | ---                    | ---     | 62 (50 - 71)           | 66 (53 - 75)           | 0.010   |
| Use of vasopressor - no. (%)               | 150 (47.8)             | 142 (78.5)             | < 0.001 | 130 (61.6)             | 242 (81.2)             | < 0.001 |
| Vital signs                                |                        |                        |         |                        |                        |         |
| Temperature, °C                            | 37.2 (36.7 - 37.8)     | 37.3 (36.7 - 38.0)     | 0.346   | ---                    | ---                    | ---     |
| Heart rate, bpm                            | 91.0 (80.5 - 103.0)    | 102.0 (88.8 - 117.0)   | < 0.001 | 90.0 (73.0 - 103.0)    | 112.0 (97.2 - 126.0)   | < 0.001 |
| Mean arterial Pressure, mmHg               | 78.0 (69.5 - 88.0)     | 70.0 (63.0 - 78.)      | < 0.001 | 80.0 (73.5 - 89.0)     | 75.0 (70.0 - 83.0)     | < 0.001 |
| SpO <sub>2</sub> , %                       | 96 (95 - 99)           | 96 (93 - 99)           | 0.270   | ---                    | ---                    | ---     |
| Urine output in 24 hours, mL               | 1570 (852 - 2383)      | 920 (350 - 1665)       | < 0.001 | ---                    | ---                    | ---     |
| Laboratory tests                           |                        |                        |         |                        |                        |         |
| Hematocrit, %                              | 31 (27 - 35)           | 31 (28 - 37)           | 0.142   | ---                    | ---                    | ---     |
| White blood cell count, 10 <sup>9</sup> /L | 13.6 (8.5 - 18.1)      | 15.4 (9.8 - 23.3)      | 0.009   | ---                    | ---                    | ---     |
| Platelets, 10 <sup>9</sup> /L              | 164 (96 - 238)         | 131 (80 - 223)         | 0.032   | 177 (120 - 292)        | 169 (90 - 256)         | 0.048   |
| Creatinine, mg/dL                          | 1.0 (0.7 - 1.5)        | 1.4 (0.9 - 2.6)        | < 0.001 | 1.0 (0.7 - 1.5)        | 1.7 (1.0 - 2.8)        | < 0.001 |
| Bilirubin, mg/dL                           | 0.8 (0.5 - 1.4)        | 0.8 (0.5 - 1.6)        | 0.630   | 0.6 (0.4 - 1.2)        | 0.9 (0.4 - 1.7)        | 0.002   |
| Arterial blood gas                         |                        |                        |         |                        |                        |         |
| pH*                                        | 7.39 (7.35 - 7.44)     | 7.31 (7.24 - 7.35)     | < 0.001 | 7.4 (7.3 - 7.4)        | 7.2 (7.2 - 7.3)        | < 0.001 |
| PaO <sub>2</sub> , mmHg                    | 82 (68 - 101)          | 86 (72 - 111.2)        | 0.112   | 118 (82 - 158)         | 104 (78 - 152)         | 0.065   |

|    |                                      |                    |                    |         |                    |                    |         |
|----|--------------------------------------|--------------------|--------------------|---------|--------------------|--------------------|---------|
| 1  | PaO <sub>2</sub> / FiO <sub>2</sub>  | 139 (98 - 195)     | 107 (74 - 159)     | < 0.001 | 118 (82 - 158)     | 104 (78 - 152)     | 0.065   |
| 2  | PaCO <sub>2</sub> , mmHg             | 38 (34 - 45)       | 38 (32 - 44)       | 0.423   | 46 (41 - 56)       | 53 (42 - 65)       | < 0.001 |
| 3  | Bicarbonate, mmol/L                  | 23 (20 - 26)       | 17 (14 - 21)       | < 0.001 | 25.2 (22.5 - 28.8) | 20.6 (17.8 - 23.4) | < 0.001 |
| 4  | Ventilatory variables                |                    |                    |         |                    |                    |         |
| 5  | Tidal volume, mL                     | 420 (360 - 480)    | 400 (340 - 450)    | 0.016   | 360 (320 - 400)    | 350 (300 - 397.8)  | 0.008   |
| 6  | Per PBW, mL/kg PBW                   | 6.4 (6.0 - 7.3)    | 6.1 (5.9 - 7.0)    | 0.030   | 6.0 (5.3 - 6.1)    | 5.9 (5.1 - 6.1)    | 0.034   |
| 7  | Plateau pressure, cmH <sub>2</sub> O | 22.0 (18.0 - 27.0) | 25.0 (20.0 - 29.0) | 0.003   | 24.0 (21.0 - 28.0) | 27.0 (23.0 - 30.0) | < 0.001 |
| 8  | PEEP, cmH <sub>2</sub> O             | 8 (5 - 10)         | 10 (8 - 13)        | 0.001   | 10 (10 - 14)       | 12 (10 - 14)       | < 0.001 |
| 9  | Respiratory rate, breaths/min        | 23 (19 - 27)       | 30 (24 - 35)       | < 0.001 | 24 (20 - 28)       | 30 (24 - 34)       | < 0.001 |
| 10 | FiO <sub>2</sub>                     | 0.50 (0.40 - 0.60) | 0.70 (0.50 - 0.90) | < 0.001 | 0.70 (0.60 - 0.80) | 0.80 (0.70 - 1.00) | < 0.001 |

13 Data are mean ± standard deviation, median (quartile 25<sup>th</sup> - quartile 75<sup>th</sup>) or N (%)  
 14 Abbreviations: APACHE denotes Acute Physiology and Chronic Health Evaluation, V<sub>T</sub>/PBW denotes tidal volume per predicted body weight...

peer review only

**eTable 8 - Biomarker levels by study and cluster**

|         | ARMA                        |                             |                               |         | ALVEOLI                     |                             |                               |         |
|---------|-----------------------------|-----------------------------|-------------------------------|---------|-----------------------------|-----------------------------|-------------------------------|---------|
|         | Subphenotype A<br>(n = 279) | Subphenotype B<br>(n = 100) | Median Difference<br>(95% CI) | p value | Subphenotype A<br>(n = 336) | Subphenotype B<br>(n = 157) | Median Difference<br>(95% CI) | p value |
| ICAM-1  | 654.0 (399.0 - 959.4)       | 888.0 (550.0 - 1365.3)      | 234 (60.3 to 407.8)           | 0.002   | 847.9 (585.7 - 1227.1)      | 1070.4 (748.2 - 1588.8)     | 219.4 (90.4 to 348.4)         | < 0.001 |
| IL-6    | 214.0 (91.8 - 553.5)        | 966.0 (291.0 - 2200.0)      | 749.1 (589.9 to 908.2)        | < 0.001 | 182.5 (85.5 - 435.2)        | 775.0 (148.0 - 2846.5)      | 592 (515.5 to 668.6)          | < 0.001 |
| PAI-1   | 65.3 (37.8 - 109.5)         | 101.7 (50.8 - 291.6)        | 41 (18.3 to 63.7)             | 0.001   | Not assessed                | Not assessed                | ---                           | ---     |
| IL-8    | 46.0 (2.0 - 91.0)           | 106.9 (43.8 - 281.4)        | 60.9 (35.6 to 86.2)           | < 0.001 | Not assessed                | Not assessed                | ---                           | ---     |
| IL-10   | 16.0 (0.0 - 40.3)           | 47.9 (0.0 - 120.7)          | 31.9 (20.2 to 43.6)           | < 0.001 | Not assessed                | Not assessed                | ---                           | ---     |
| TNFR-I  | 2604.0 (1950.0 - 3777.0)    | 6897.0 (3622.5 - 12281.5)   | 4293 (3323.6 to 5262.4)       | < 0.001 | Not assessed                | Not assessed                | ---                           | ---     |
| TNFR-II | 6581.0 (4958.0 - 9658.0)    | 18611.0 (12262.5 - 35652.0) | 12030 (9577.5 to 14482.5)     | < 0.001 | Not assessed                | Not assessed                | ---                           | ---     |
| SPA     | 29.0 (11.8 - 68.0)          | 25.0 (10.5 - 40.0)          | -4 (-19.9 to 11.9)            | 0.398   | Not assessed                | Not assessed                | ---                           | ---     |
| SPD     | 76.0 (36.2 - 145.2)         | 59.0 (30.0 - 125.0)         | -18 (-52.6 to 16.6)           | 0.254   | Not assessed                | Not assessed                | ---                           | ---     |
| VW      | 308.0 (165.5 - 431.0)       | 384.0 (246.0 - 549.0)       | 76 (-26.5 to 178.5)           | 0.045   | Not assessed                | Not assessed                | ---                           | ---     |

18 Data are median (quartile 25<sup>th</sup> - quartile 75<sup>th</sup>).

19 Abbreviations: 95%CI denotes 95% confidence interval, ICAM-1 is intercellular adhesion molecule-1, IL-6 is interleukin-6, PAI-1 is plasminogen activator inhibitor-1, IL-8 is interleukin-8, IL-10 is interleukin-10, TNFR-I is tumor necrosis factor receptor 1, TNFR-II is tumor necrosis factor II, SPA is surfact protein A, SPD is surfact Protein D and VW is Von Willebrand factor.



**eTable 9 - Percentage of missingness in biomarker levels measured on day of randomization, on ARMA and ALVEOLI trials for patients with an assigned subphenotype**

| Biomarker | ARMA<br>(n = 379) |                | ALVEOLI<br>(n = 493) |                |
|-----------|-------------------|----------------|----------------------|----------------|
|           | Subphenotype A    | Subphenotype B | Subphenotype A       | Subphenotype B |
| ICAM-1    | 43%               | 31%            | 4%                   | 3%             |
| IL-6      | 41%               | 33%            | 4%                   | 4%             |
| PAI-1     | 42%               | 32%            | Not assessed         | Not assessed   |
| IL-8      | 41%               | 33%            | Not assessed         | Not assessed   |
| IL-10     | 42%               | 33%            | Not assessed         | Not assessed   |
| TNFR-I    | 68%               | 61%            | Not assessed         | Not assessed   |
| TNFR-II   | 68%               | 61%            | Not assessed         | Not assessed   |
| SPA       | 67%               | 61%            | Not assessed         | Not assessed   |
| SPD       | 67%               | 61%            | Not assessed         | Not assessed   |
| VW        | 67%               | 61%            | Not assessed         | Not assessed   |

Abbreviations: ICAM-1 is intercellular adhesion molecule-1, IL-6 is interleukin-6, PAI-1 is plasminogen activator inhibitor-1, IL-8 is interleukin-8, IL-10 is interleukin-10, TNFR-I is tumor necrosis factor receptor 1, TNFR-II is tumor necrosis factor II, SPA is surfact protein A, SPD is surfact Protein D and VW is Von Willebrand factor.

eFigure 1 - Calinski-Harabasz Index and Elbow Method for Each of the 10 Models

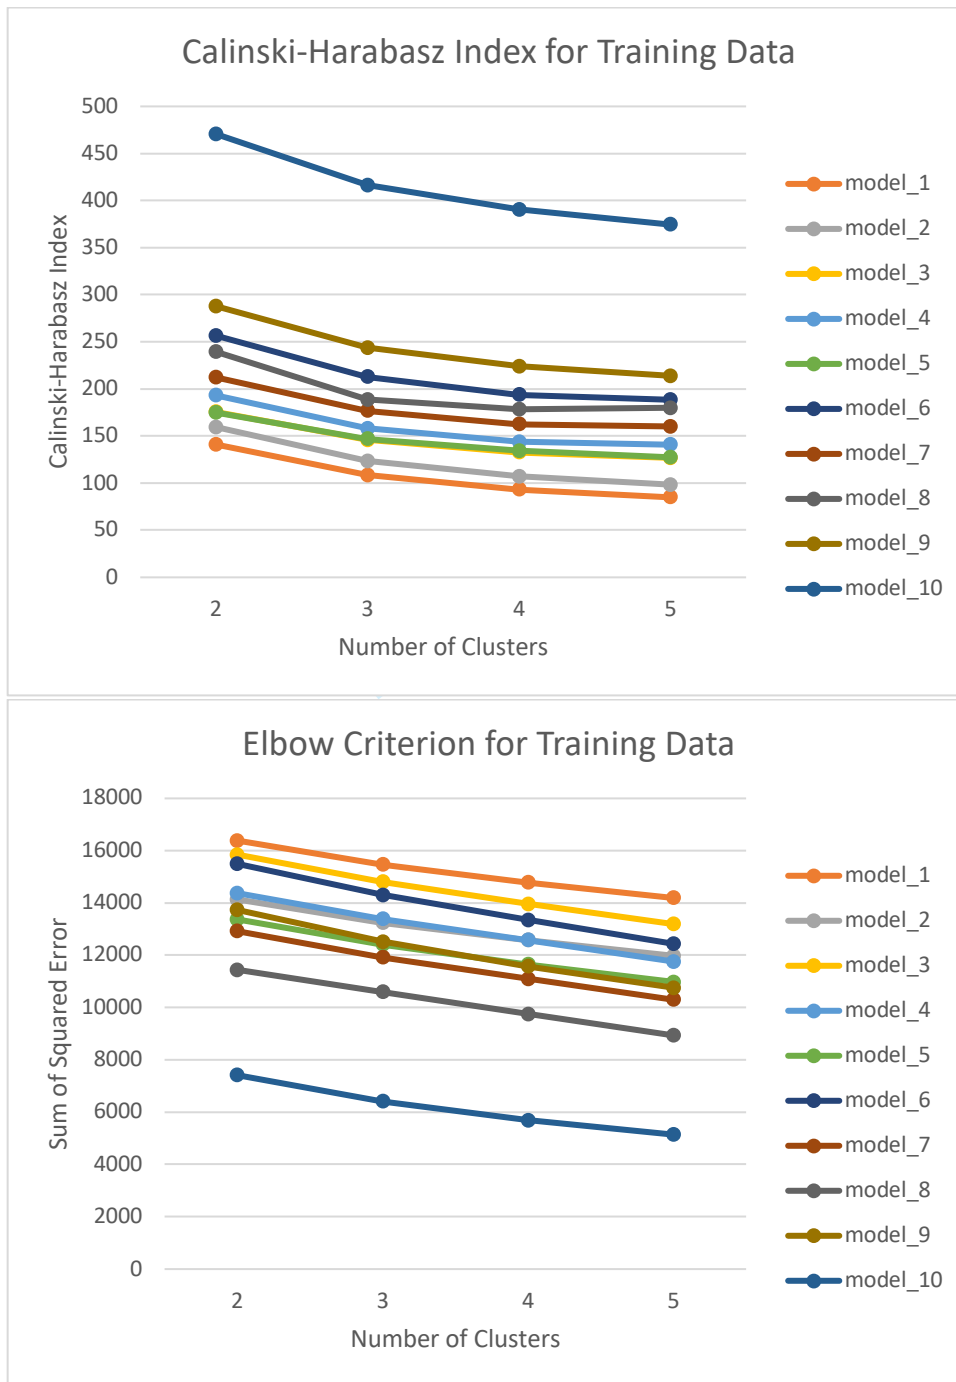

eFigure 2 - Variable Averages for Each Study

Variable Averages

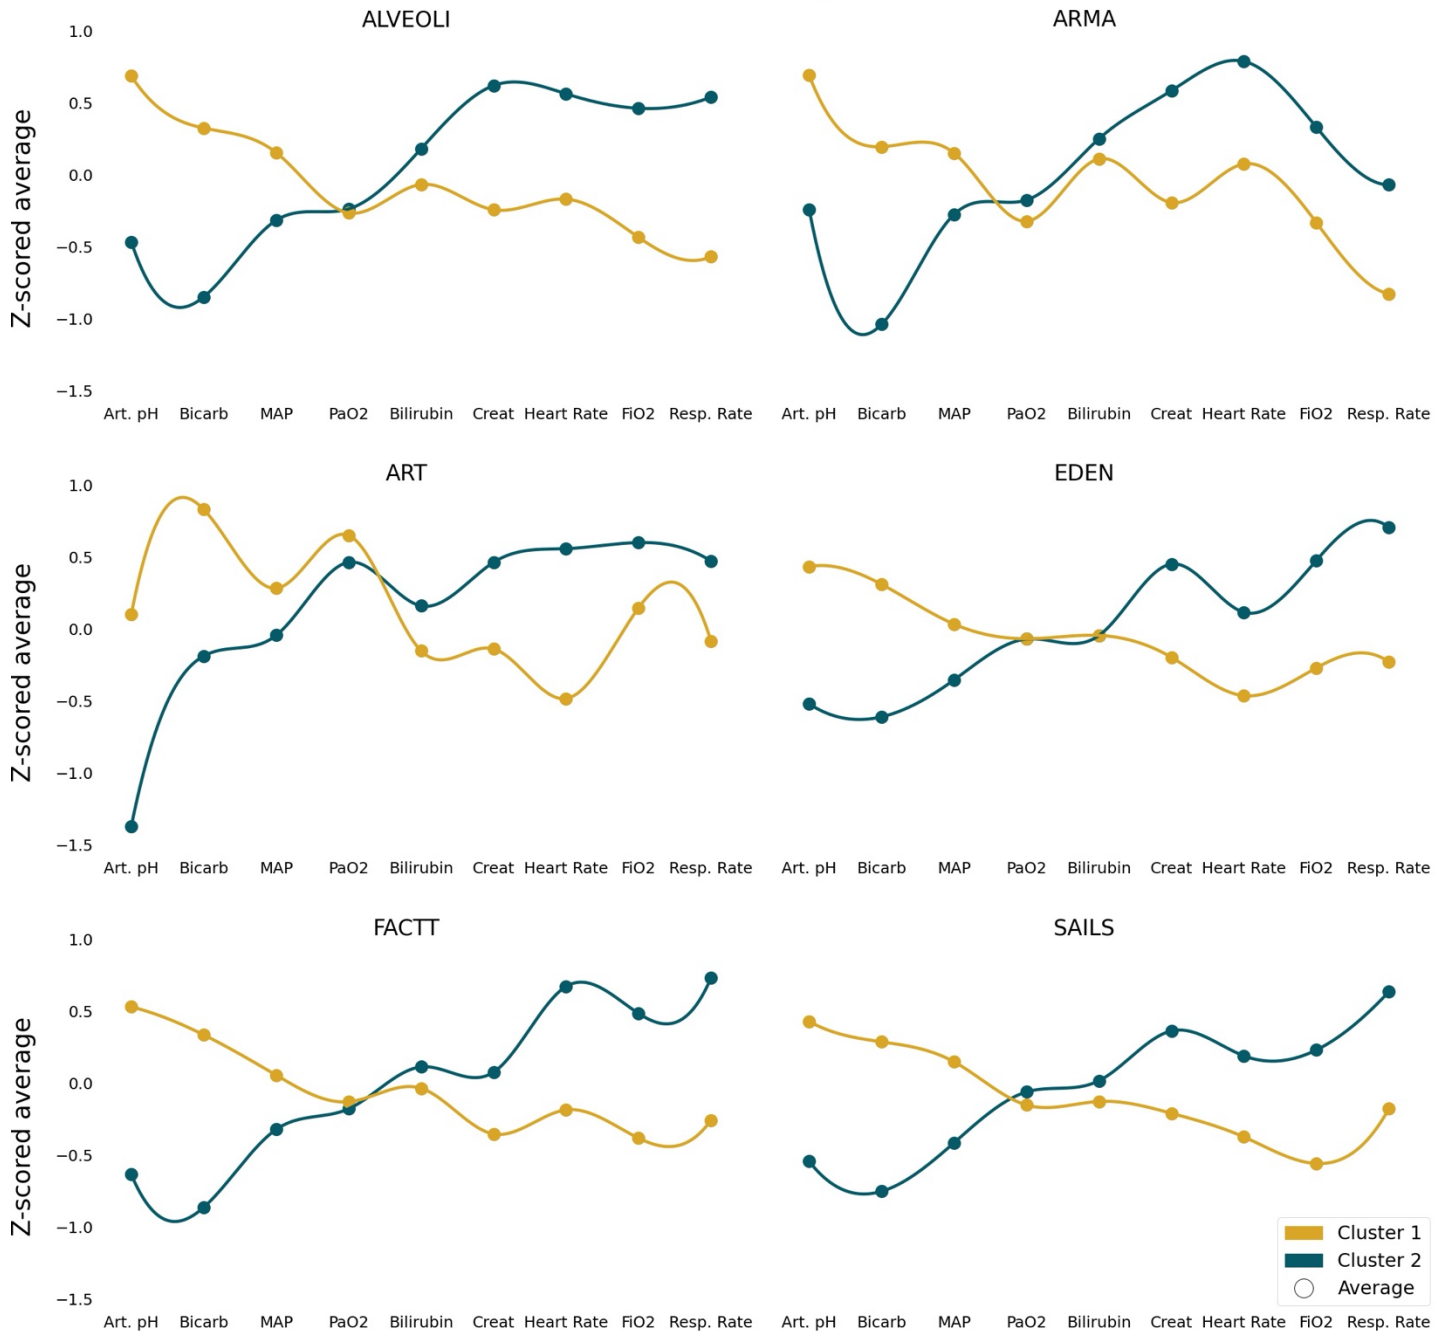

The circles represent the averages for each variable. The colored lines are exclusively to help visualize the opposite trends of the variables on the different clusters.

Abbreviations: Art. pH is arterial pH, Bicarb is bicarbonate, MAP is mean arterial pressure, Creat is creatinine and Resp. Rate is respiratory rate

## Reference:

1. Yehya N, Harhay MO, Curley MAQ, Schoenfeld DA, Reeder RW. Reappraisal of Ventilator-Free Days in Critical Care Research. *Am J Respir Crit Care Med.* 2019 Oct 1;200(7):828-836. doi: 10.1164/rccm.201810-2050CP.

For peer review only

# Reporting checklist for prediction model development/validation.

Based on the TRIPOD guidelines.

## Instructions to authors

Complete this checklist by entering the page numbers from your manuscript where readers will find each of the items listed below.

Your article may not currently address all the items on the checklist. Please modify your text to include the missing information. If you are certain that an item does not apply, please write "n/a" and provide a short explanation.

Upload your completed checklist as an extra file when you submit to a journal.

In your methods section, say that you used the TRIPOD reporting guidelines, and cite them as:

Collins GS, Reitsma JB, Altman DG, Moons KG. Transparent reporting of a multivariable prediction model for individual prognosis or diagnosis (TRIPOD): The TRIPOD statement.

|                     | Reporting Item                                                                                                                                                                                                       | Page Number |
|---------------------|----------------------------------------------------------------------------------------------------------------------------------------------------------------------------------------------------------------------|-------------|
| <b>Title</b>        |                                                                                                                                                                                                                      |             |
|                     | <a href="#">#1</a> Identify the study as developing and / or validating a multivariable prediction model, the target population, and the outcome to be predicted.                                                    | 1           |
| <b>Abstract</b>     |                                                                                                                                                                                                                      |             |
|                     | <a href="#">#2</a> Provide a summary of objectives, study design, setting, participants, sample size, predictors, outcome, statistical analysis, results, and conclusions.                                           | 2           |
| <b>Introduction</b> |                                                                                                                                                                                                                      |             |
|                     | <a href="#">#3a</a> Explain the medical context (including whether diagnostic or prognostic) and rationale for developing or validating the multivariable prediction model, including references to existing models. | 6           |
|                     | <a href="#">#3b</a> Specify the objectives, including whether the study describes the                                                                                                                                | 6           |

development or validation of the model or both.

## Methods

|    |                              |                      |                                                                                                                                                                         |
|----|------------------------------|----------------------|-------------------------------------------------------------------------------------------------------------------------------------------------------------------------|
| 1  |                              |                      |                                                                                                                                                                         |
| 2  |                              |                      |                                                                                                                                                                         |
| 3  | <b>Methods</b>               |                      |                                                                                                                                                                         |
| 4  |                              |                      |                                                                                                                                                                         |
| 5  | Source of data               | <a href="#">#4a</a>  | Describe the study design or source of data (e.g., randomized trial, cohort, or registry data), separately for the development and validation data sets, if applicable. |
| 6  |                              |                      | 8                                                                                                                                                                       |
| 7  |                              |                      |                                                                                                                                                                         |
| 8  |                              |                      |                                                                                                                                                                         |
| 9  |                              |                      |                                                                                                                                                                         |
| 10 | Source of data               | <a href="#">#4b</a>  | Specify the key study dates, including start of accrual; end of accrual; and, if applicable, end of follow-up.                                                          |
| 11 |                              |                      | 8                                                                                                                                                                       |
| 12 |                              |                      |                                                                                                                                                                         |
| 13 |                              |                      |                                                                                                                                                                         |
| 14 | Participants                 | <a href="#">#5a</a>  | Specify key elements of the study setting (e.g., primary care, secondary care, general population) including number and location of centres.                            |
| 15 |                              |                      | 8                                                                                                                                                                       |
| 16 |                              |                      |                                                                                                                                                                         |
| 17 |                              |                      |                                                                                                                                                                         |
| 18 | Participants                 | <a href="#">#5b</a>  | Describe eligibility criteria for participants.                                                                                                                         |
| 19 |                              |                      | 8                                                                                                                                                                       |
| 20 | Participants                 | <a href="#">#5c</a>  | Give details of treatments received, if relevant                                                                                                                        |
| 21 |                              |                      | 8                                                                                                                                                                       |
| 22 |                              |                      |                                                                                                                                                                         |
| 23 | Outcome                      | <a href="#">#6a</a>  | Clearly define the outcome that is predicted by the prediction model, including how and when assessed.                                                                  |
| 24 |                              |                      | 9                                                                                                                                                                       |
| 25 |                              |                      |                                                                                                                                                                         |
| 26 | Outcome                      | <a href="#">#6b</a>  | Report any actions to blind assessment of the outcome to be predicted.                                                                                                  |
| 27 |                              |                      | N/A                                                                                                                                                                     |
| 28 |                              |                      |                                                                                                                                                                         |
| 29 | Predictors                   | <a href="#">#7a</a>  | Clearly define all predictors used in developing or validating the multivariable prediction model, including how and when they were measured                            |
| 30 |                              |                      | 8                                                                                                                                                                       |
| 31 |                              |                      |                                                                                                                                                                         |
| 32 |                              |                      |                                                                                                                                                                         |
| 33 |                              |                      |                                                                                                                                                                         |
| 34 | Predictors                   | <a href="#">#7b</a>  | Report any actions to blind assessment of predictors for the outcome and other predictors.                                                                              |
| 35 |                              |                      | N/A                                                                                                                                                                     |
| 36 |                              |                      |                                                                                                                                                                         |
| 37 |                              |                      |                                                                                                                                                                         |
| 38 | Sample size                  | <a href="#">#8</a>   | Explain how the study size was arrived at.                                                                                                                              |
| 39 |                              |                      | 8                                                                                                                                                                       |
| 40 | Missing data                 | <a href="#">#9</a>   | Describe how missing data were handled (e.g., complete-case analysis, single imputation, multiple imputation) with details of any imputation method.                    |
| 41 |                              |                      | 9                                                                                                                                                                       |
| 42 |                              |                      |                                                                                                                                                                         |
| 43 |                              |                      |                                                                                                                                                                         |
| 44 |                              |                      |                                                                                                                                                                         |
| 45 | Statistical analysis methods | <a href="#">#10a</a> | If you are developing a prediction model describe how predictors were handled in the analyses.                                                                          |
| 46 |                              |                      | N/A                                                                                                                                                                     |
| 47 |                              |                      |                                                                                                                                                                         |
| 48 |                              |                      |                                                                                                                                                                         |
| 49 | Statistical analysis methods | <a href="#">#10b</a> | If you are developing a prediction model, specify type of model, all model-building procedures (including any predictor selection), and method for internal validation. |
| 50 |                              |                      | N/A                                                                                                                                                                     |
| 51 |                              |                      |                                                                                                                                                                         |
| 52 |                              |                      |                                                                                                                                                                         |
| 53 |                              |                      |                                                                                                                                                                         |
| 54 | Statistical analysis methods | <a href="#">#10c</a> | If you are validating a prediction model, describe how the predictions were calculated.                                                                                 |
| 55 |                              |                      | N/A                                                                                                                                                                     |
| 56 |                              |                      |                                                                                                                                                                         |
| 57 |                              |                      |                                                                                                                                                                         |
| 58 | Statistical analysis         | <a href="#">#10d</a> | Specify all measures used to assess model performance and, if relevant,                                                                                                 |
| 59 |                              |                      | 10                                                                                                                                                                      |
| 60 |                              |                      |                                                                                                                                                                         |

|    |                      |                      |                                                                           |     |
|----|----------------------|----------------------|---------------------------------------------------------------------------|-----|
| 1  | methods              |                      | to compare multiple models.                                               |     |
| 2  | Statistical analysis | <a href="#">#10e</a> | If you are validating a prediction model, describe any model updating     | N/A |
| 3  | methods              |                      | (e.g., recalibration) arising from the validation, if done                |     |
| 4  |                      |                      |                                                                           |     |
| 5  |                      |                      |                                                                           |     |
| 6  | Risk groups          | <a href="#">#11</a>  | Provide details on how risk groups were created, if done.                 | 11  |
| 7  |                      |                      |                                                                           |     |
| 8  | Development vs.      | <a href="#">#12</a>  | For validation, identify any differences from the development data in     | 10  |
| 9  | validation           |                      | setting, eligibility criteria, outcome, and predictors.                   |     |
| 10 |                      |                      |                                                                           |     |
| 11 |                      |                      |                                                                           |     |
| 12 | <b>Results</b>       |                      |                                                                           |     |
| 13 |                      |                      |                                                                           |     |
| 14 | Participants         | <a href="#">#13a</a> | Describe the flow of participants through the study, including the        | 12  |
| 15 |                      |                      | number of participants with and without the outcome and, if applicable,   |     |
| 16 |                      |                      | a summary of the follow-up time. A diagram may be helpful.                |     |
| 17 |                      |                      |                                                                           |     |
| 18 | Participants         | <a href="#">#13b</a> | Describe the characteristics of the participants (basic demographics,     | 12  |
| 19 |                      |                      | clinical features, available predictors), including the number of         |     |
| 20 |                      |                      | participants with missing data for predictors and outcome.                |     |
| 21 |                      |                      |                                                                           |     |
| 22 | Participants         | <a href="#">#13c</a> | For validation, show a comparison with the development data of the        | 12  |
| 23 |                      |                      | distribution of important variables (demographics, predictors and         |     |
| 24 |                      |                      | outcome).                                                                 |     |
| 25 |                      |                      |                                                                           |     |
| 26 | Model                | <a href="#">#14a</a> | If developing a model, specify the number of participants and outcome     | 12  |
| 27 | development          |                      | events in each analysis.                                                  |     |
| 28 |                      |                      |                                                                           |     |
| 29 | Model                | <a href="#">#14b</a> | If developing a model, report the unadjusted association, if calculated   | N/A |
| 30 | development          |                      | between each candidate predictor and outcome.                             |     |
| 31 |                      |                      |                                                                           |     |
| 32 | Model                | <a href="#">#15a</a> | If developing a model, present the full prediction model to allow         | N/A |
| 33 | specification        |                      | predictions for individuals (i.e., all regression coefficients, and model |     |
| 34 |                      |                      | intercept or baseline survival at a given time point).                    |     |
| 35 |                      |                      |                                                                           |     |
| 36 | Model                | <a href="#">#15b</a> | If developing a prediction model, explain how to use it.                  | N/A |
| 37 | specification        |                      |                                                                           |     |
| 38 |                      |                      |                                                                           |     |
| 39 | Model                | <a href="#">#16</a>  | Report performance measures (with CIs) for the prediction model.          | 14  |
| 40 | performance          |                      |                                                                           |     |
| 41 |                      |                      |                                                                           |     |
| 42 | Model-updating       | <a href="#">#17</a>  | If validating a model, report the results from any model updating, if     | N/A |
| 43 |                      |                      | done (i.e., model specification, model performance).                      |     |
| 44 |                      |                      |                                                                           |     |
| 45 |                      |                      |                                                                           |     |
| 46 | <b>Discussion</b>    |                      |                                                                           |     |
| 47 |                      |                      |                                                                           |     |
| 48 | Limitations          | <a href="#">#18</a>  | Discuss any limitations of the study (such as nonrepresentative sample,   | 19  |
| 49 |                      |                      |                                                                           |     |
| 50 |                      |                      |                                                                           |     |

few events per predictor, missing data).

|    |                    |                      |                                                                             |
|----|--------------------|----------------------|-----------------------------------------------------------------------------|
| 1  |                    |                      |                                                                             |
| 2  |                    |                      |                                                                             |
| 3  | Interpretation     | <a href="#">#19a</a> | For validation, discuss the results with reference to performance in the 17 |
| 4  |                    |                      | development data, and any other validation data                             |
| 5  |                    |                      |                                                                             |
| 6  | Interpretation     | <a href="#">#19b</a> | Give an overall interpretation of the results, considering objectives, 17   |
| 7  |                    |                      | limitations, results from similar studies, and other relevant evidence.     |
| 8  |                    |                      |                                                                             |
| 9  |                    |                      |                                                                             |
| 10 | Implications       | <a href="#">#20</a>  | Discuss the potential clinical use of the model and implications for 20     |
| 11 |                    |                      | future research                                                             |
| 12 |                    |                      |                                                                             |
| 13 |                    |                      |                                                                             |
| 14 | <b>Other</b>       |                      |                                                                             |
| 15 | <b>information</b> |                      |                                                                             |
| 16 |                    |                      |                                                                             |
| 17 |                    |                      |                                                                             |
| 18 | Supplementary      | <a href="#">#21</a>  | Provide information about the availability of supplementary resources, 22   |
| 19 | information        |                      | such as study protocol, Web calculator, and data sets.                      |
| 20 |                    |                      |                                                                             |
| 21 | Funding            | <a href="#">#22</a>  | Give the source of funding and the role of the funders for the present 22   |
| 22 |                    |                      | study.                                                                      |
| 23 |                    |                      |                                                                             |
| 24 |                    |                      |                                                                             |

The TRIPOD checklist is distributed under the terms of the Creative Commons Attribution License CC-BY.

This checklist was completed on 07. May 2021 using <https://www.goodreports.org/>, a tool made by the

[EQUATOR Network](#) in collaboration with [Penelope.ai](#)



# BMJ Open

## Identification of Acute Respiratory Distress Syndrome subphenotypes denovo using routine clinical data: a retrospective analysis of ARDS clinical trials

|                                 |                                                                                                                                                                                                                                                                                                                                                                                                                                                                                                                                                                                                                                                                                                                                                                                                                                                                                                                                                                                                                                                                                                      |
|---------------------------------|------------------------------------------------------------------------------------------------------------------------------------------------------------------------------------------------------------------------------------------------------------------------------------------------------------------------------------------------------------------------------------------------------------------------------------------------------------------------------------------------------------------------------------------------------------------------------------------------------------------------------------------------------------------------------------------------------------------------------------------------------------------------------------------------------------------------------------------------------------------------------------------------------------------------------------------------------------------------------------------------------------------------------------------------------------------------------------------------------|
| Journal:                        | <i>BMJ Open</i>                                                                                                                                                                                                                                                                                                                                                                                                                                                                                                                                                                                                                                                                                                                                                                                                                                                                                                                                                                                                                                                                                      |
| Manuscript ID                   | bmjopen-2021-053297.R2                                                                                                                                                                                                                                                                                                                                                                                                                                                                                                                                                                                                                                                                                                                                                                                                                                                                                                                                                                                                                                                                               |
| Article Type:                   | Original research                                                                                                                                                                                                                                                                                                                                                                                                                                                                                                                                                                                                                                                                                                                                                                                                                                                                                                                                                                                                                                                                                    |
| Date Submitted by the Author:   | 29-Nov-2021                                                                                                                                                                                                                                                                                                                                                                                                                                                                                                                                                                                                                                                                                                                                                                                                                                                                                                                                                                                                                                                                                          |
| Complete List of Authors:       | Duggal, Abhijit ; Cleveland Clinic, Department of Critical Care Medicine<br>Kast, Rachel; Endpoint Health Inc, Department of Clinical Data Science<br>Van Ark, Emily; Endpoint Health Inc, Department of Clinical Data Science<br>Bulgarelli, Lucas; Endpoint Health Inc, Department of Clinical Data Science<br>Siuba, Matthew T.; Cleveland Clinic, Department of Critical Care Medicine<br>Osborn, Jeff; Endpoint Health Inc, Department of Clinical Data Science<br>Rey, Diego; Endpoint Health Inc, Department of Clinical Data Science<br>Zampieri, Fernando; HCor Research Institute<br>Cavalcanti, Alexandre ; HCor Research Institute<br>Maia, Israel; Hospital do Coracao<br>Paisani, Denise M; HCor Research Institute<br>Laranjeira, Ligia N; HCor Research Institute<br>Sarpa Neto, Ary; Monash University, Australian and New Zealand Intensive Care Research Centre (ANZIC-RC), School of Public Health and Preventive Medicine,; Hospital Israelita Albert Einstein, Critical Care Medicine<br>Deliberato, Rodrigo Octávio; Endpoint Health Inc, Department of Clinical Data Science |
| <b>Primary Subject Heading</b>: | Intensive care                                                                                                                                                                                                                                                                                                                                                                                                                                                                                                                                                                                                                                                                                                                                                                                                                                                                                                                                                                                                                                                                                       |
| Secondary Subject Heading:      | Respiratory medicine                                                                                                                                                                                                                                                                                                                                                                                                                                                                                                                                                                                                                                                                                                                                                                                                                                                                                                                                                                                                                                                                                 |
| Keywords:                       | Adult intensive & critical care < INTENSIVE & CRITICAL CARE, Adult intensive & critical care < ANAESTHETICS, RESPIRATORY MEDICINE (see Thoracic Medicine)                                                                                                                                                                                                                                                                                                                                                                                                                                                                                                                                                                                                                                                                                                                                                                                                                                                                                                                                            |
|                                 |                                                                                                                                                                                                                                                                                                                                                                                                                                                                                                                                                                                                                                                                                                                                                                                                                                                                                                                                                                                                                                                                                                      |

SCHOLARONE™  
Manuscripts



I, the Submitting Author has the right to grant and does grant on behalf of all authors of the Work (as defined in the below author licence), an exclusive licence and/or a non-exclusive licence for contributions from authors who are: i) UK Crown employees; ii) where BMJ has agreed a CC-BY licence shall apply, and/or iii) in accordance with the terms applicable for US Federal Government officers or employees acting as part of their official duties; on a worldwide, perpetual, irrevocable, royalty-free basis to BMJ Publishing Group Ltd ("BMJ") its licensees and where the relevant Journal is co-owned by BMJ to the co-owners of the Journal, to publish the Work in this journal and any other BMJ products and to exploit all rights, as set out in our [licence](#).

The Submitting Author accepts and understands that any supply made under these terms is made by BMJ to the Submitting Author unless you are acting as an employee on behalf of your employer or a postgraduate student of an affiliated institution which is paying any applicable article publishing charge ("APC") for Open Access articles. Where the Submitting Author wishes to make the Work available on an Open Access basis (and intends to pay the relevant APC), the terms of reuse of such Open Access shall be governed by a Creative Commons licence – details of these licences and which [Creative Commons](#) licence will apply to this Work are set out in our licence referred to above.

Other than as permitted in any relevant BMJ Author's Self Archiving Policies, I confirm this Work has not been accepted for publication elsewhere, is not being considered for publication elsewhere and does not duplicate material already published. I confirm all authors consent to publication of this Work and authorise the granting of this licence.

# Identification of Acute Respiratory Distress Syndrome subphenotypes de novo using routine clinical data: a retrospective analysis of ARDS clinical trials

Abhijit Duggal MD<sup>1</sup>‡, Rachel Kast PhD<sup>2</sup>‡, Emily Van Ark PhD<sup>2</sup>‡, Lucas Bulgarelli BSc<sup>2</sup>‡, Matthew T. Siuba DO<sup>1</sup>, Jeff Osborn<sup>2</sup>, Diego Rey PhD<sup>2</sup>, Fernando G Zampieri MD PhD<sup>3</sup>, Alexandre B Cavalcanti MD PhD<sup>3</sup>, Israel S Maia MD<sup>3</sup>, Denise M Paisani PhD<sup>3</sup>, Ligia N Laranjeira<sup>3</sup>, Ary Serpa Neto MD MSc PhD,<sup>4,5,6,7,8</sup> Rodrigo Octávio Deliberato MD PhD<sup>2</sup>

‡ Authors contributed equally

1. Department of Critical Care Medicine, Respiratory Institute, Cleveland Clinic, Cleveland, Ohio, USA.
2. Department of Clinical Data Science, Endpoint Health Inc, Palo Alto, California, USA.
3. HCor Research Institute, São Paulo, Brazil
4. Australian and New Zealand Intensive Care Research Centre (ANZIC-RC), School of Public Health and Preventive Medicine, Monash University, Melbourne, Australia.
5. Department of Critical Care, Melbourne Medical School, University of Melbourne, Austin Hospital, Melbourne, Australia.
6. Department of Intensive Care, Austin Hospital, Melbourne, Australia.
7. Data Analytics Research and Evaluation (DARE) Centre, Austin Hospital, Melbourne, Australia.
8. Department of Critical Care Medicine, Hospital Israelita Albert Einstein, São Paulo, Brazil.

## Correspondence:

Abhijit Duggal MD

Address: 9500 Euclid Ave, L2-330, Cleveland, Ohio, 44195

E-mail: [duggala2@ccf.org](mailto:duggala2@ccf.org)

1  
2  
3 **Word count (Abstract):** 236 words  
4

5 **Word count (Text):** 2814 words  
6

7 **Number of figures:** 2 figures  
8

9 **Number of tables:** 3 tables  
10

11 **Supplementary Material:** 01  
12

13 **Key words:** Subphenotype, machine learning, ARDS, critical care, clinical data,  
14 clustering  
15  
16  
17  
18  
19  
20  
21  
22  
23  
24  
25  
26  
27  
28  
29  
30  
31  
32  
33  
34  
35  
36  
37  
38  
39  
40  
41  
42  
43  
44  
45  
46  
47  
48  
49  
50  
51  
52  
53  
54  
55  
56  
57  
58  
59  
60

For peer review only

## ABSTRACT

**Objectives:** The acute respiratory distress syndrome (ARDS) is a heterogeneous condition, and identification of subphenotypes may help in better risk stratification. Our study objective is to identify ARDS subphenotypes using new simpler methodology and readily available clinical variables.

**Setting:** This is a retrospective Cohort Study of ARDS trials. Data from the U.S. ARDSNet trials and from the international ART trial.

**Participants:** 3763 patients from ARDSNet datasets and 1010 patients from the ART dataset.

**Primary and secondary outcome measures:** The primary outcome was 60-day or 28-day mortality, depending on what was reported in the original trial. K-means cluster analysis was performed to identify subgroups. Sets of candidate variables were tested to assess their ability to produce different probabilities for mortality in each cluster. Clusters were compared to biomarker data, allowing identification of subphenotypes.

**Results:** Data from 4,773 patients was analyzed. Two subphenotypes (A and B) resulted in optimal separation in the final model, which included nine routinely collected clinical variables, namely: heart rate, mean arterial pressure, respiratory rate, bilirubin, bicarbonate, creatinine, PaO<sub>2</sub>, arterial pH, and FiO<sub>2</sub>. Participants in subphenotype B showed increased levels of pro-inflammatory markers, had consistently higher mortality, lower number of ventilator-free days at day 28, and longer duration of ventilation compared to patients in the subphenotype A.

1  
2  
3 **Conclusions:** Routinely available clinical data can successfully identify two distinct  
4 subphenotypes in adult ARDS patients. This work may facilitate implementation of  
5 precision therapy in ARDS clinical trials.  
6  
7  
8  
9  
10  
11  
12  
13  
14  
15  
16  
17  
18  
19  
20  
21  
22  
23  
24  
25  
26  
27  
28  
29  
30  
31  
32  
33  
34  
35  
36  
37  
38  
39  
40  
41  
42  
43  
44  
45  
46  
47  
48  
49  
50  
51  
52  
53  
54  
55  
56  
57  
58  
59  
60

For peer review only

## ARTICLE SUMMARY

### Strengths and limitations of this study

- Largest cohort of patients used to identify subphenotypes of ARDS patients.
- Subphenotypes were validated in the population of a large international ARDS randomized controlled trial.
- Subphenotypes were identified by using only routinely collected clinical data.
- Our use of data exclusively from randomized controlled trials does not prove generalizability to unselected ARDS populations.
- The clinical utility of the subphenotypes has to be validated in a prospective study.

## INTRODUCTION

The Berlin definition of acute respiratory distress syndrome (ARDS) encompasses acute hypoxemic respiratory failure due to a wide variety of etiologies [1]. Due to this inclusion of heterogeneous conditions within the syndrome, there are significant clinical and biological differences that make ARDS challenging to treat [2,3]. These differences amongst ARDS patients are associated with variation in risk of disease development and progression [3,4], potentially generating differential responses to treatments and interventions [5–10]. Despite evidence, clinical risk stratification of ARDS patients still solely depends on PaO<sub>2</sub>/FiO<sub>2</sub> ratios [11,12], possibly misleading the interpretation of results in clinical trials and clinicians when evaluating treatment options for patients [13].

Therefore, identifying groups of patients who have similar clinical, physiologic, or biomarker traits becomes relevant [6,14] as it can help with stratification of patients producing better targeted therapies and interventions [15]. These different groups can be defined as ARDS subphenotypes [4,14]. Two ARDS subphenotypes have been consistently identified in previous studies [6–10,16–18]. However, these models are complex, and significant barriers exist in their implementation and use in clinical practice. Existing models use up to 40 predictor variables, including biomarkers and other variables that are not readily available at the bedside [6–10,16–18]. These limitations explain the current status quo of ARDS care, where clinicians must depend on the limited prognostic value of PaO<sub>2</sub>/FiO<sub>2</sub> ratios instead of biologically distinct subphenotypes.

We hypothesized that the use of a simpler methodology and a small number of easily available clinical variables could identify new ARDS subphenotypes and thus provide the means to allow future implementation of bedside stratification.



## METHODS

### Data source and participants

We performed a retrospective study using a de-identified dataset pooling data from six randomized clinical trials in patients with ARDS, namely: ARMA, ALVEOLI, FACTT, EDEN, SAILS, and ART [19–24]. Patients in ARMA, ALVEOLI, FACTT, EDEN, and SAILS trials were eligible if they met the American-European consensus for ARDS, including patients with a  $\text{PaO}_2 / \text{FiO}_2$  ratio  $< 300$  up to 48 hours before enrollment. From 1996 to 2013, these trials enrolled 902, 549, 1000, 1000, and 745 patients, respectively, and tested a variety of interventions [19–23]. Between 2011 and 2017 the international ART study enrolled 1010 adult patients diagnosed with moderate to severe ARDS according to the Berlin definition ( $\text{PaO}_2 / \text{FiO}_2$  ratio  $< 200$ ) for less than 72 hours of duration and assessed two different ventilatory strategies [24]. To avoid biases due to high mortality in the high tidal volume group of the ARMA study [19], which has not been standard of care since the beginning of 2000, only 473 patients receiving low tidal volume in that study were included.

### Predictors

Six clinical trials were assessed to identify a set of clinical variables recorded closest to time of randomization which were most commonly available across all datasets. The list of potential candidates was then further refined to include only those that are frequently observed in the routine care of ARDS patients at the time of its diagnosis according to judgement provided by ICU physicians who participated in this study. To develop a clustering algorithm for potential rapid translation into clinical use, elements which would not be commonly found in the electronic health records (EHR) at the time of ARDS

1  
2  
3 diagnosis, such as biomarker levels, ARDS risk factors, organ support apart from  
4 mechanical ventilation settings, and severity scores, were excluded from model  
5 development. The treatment assignment in the original trials, and clinical outcomes were  
6 not considered in the model development.  
7  
8  
9  
10  
11

12 After all assessment, 16 variables that are routinely collected as part of the usual  
13 care and which were uniformly present in all the trials were considered, including: age,  
14 gender, arterial pH, PaO<sub>2</sub>, PaCO<sub>2</sub>, bicarbonate, creatinine, bilirubin, platelets, heart rate,  
15 respiratory rate, mean arterial pressure, positive end-expiratory pressure (PEEP), plateau  
16 pressure, FiO<sub>2</sub>, and tidal volume adjusted for predicted body weight (mL/kg PBW). The  
17 PBW was calculated as equal to  $50 + 0.91$  (centimeters of height – 152.4) in males, and  
18  $45.5 + 0.91$  (centimeters of height – 152.4) in females [18]. These variables were grouped  
19 into five domains named demographics, arterial blood gases, laboratory values, vital  
20 signs, and ventilatory variables. Plateau pressure was excluded due to a high rate of  
21 missingness across the trials included in the training set. Amount of missing data in the  
22 training datasets is reported in **eTable 1**.  
23  
24  
25  
26  
27  
28  
29  
30  
31  
32  
33  
34  
35  
36

### 37 **Outcomes**

38 The primary outcome was 60-day mortality for all ARDSnet trials, and 28-day mortality  
39 for ART trial. Secondary outcomes included 90-day mortality, number of ventilator free  
40 days at day 28 [25], and the duration of mechanical ventilation in survivors within the first  
41 28 days post enrollment.  
42  
43  
44  
45  
46  
47  
48

### 49 **Data preparation**

50 Data preprocessing was performed before modeling, and the pooled dataset was  
51 assessed for completeness and consistency. Patients with values out of the plausible  
52  
53  
54  
55  
56  
57  
58  
59  
60

1  
2  
3 physiological range for a specific variable were excluded from the final analysis  
4  
5 (described in **eTable 2**). The training dataset was constructed using data from the two  
6  
7 largest ARDSnet trials, EDEN and FACTT. The validation dataset was sourced from the  
8  
9 four remaining trials: ALVEOLI, ARMA, SAILS, and ART. Means and standard deviations  
10  
11 for z-scoring variables were calculated from the training dataset and subsequently applied  
12  
13 to the validation data.  
14  
15

### 16 **Statistical analysis**

17  
18 Baseline and outcome data were presented according to the assigned cluster.  
19  
20 Continuous variables were presented as medians with their interquartile ranges and  
21  
22 categorical variables as total number and percentage. Proportions were compared using  
23  
24 Fisher exact tests and continuous variables were compared using the Wilcoxon rank-sum  
25  
26 test. Study outcomes were further compared using the median and mean absolute  
27  
28 differences for continuous and categorical values, respectively.  
29  
30  
31

### 32 **Model development and validation**

33  
34 For the model development, the K-means clustering algorithm was used. K-means is one  
35  
36 of the simplest and most used classes of clustering algorithms. In critical care research,  
37  
38 unsupervised machine learning techniques have already been used in several studies,  
39  
40 attempting to find homogeneous subgroups within a broad heterogeneous population  
41  
42 [26]. This specific algorithm identifies a K number of clusters in a dataset by finding K  
43  
44 centroids within the n-dimensional space of clinical features [26].  
45  
46  
47  
48

49 For feature selection, different sets of candidate variables were tested to assess  
50  
51 their ability to produce significantly different mortality probabilities in each cluster using  
52  
53 the minimum amount of readily available clinical data. For each set of candidate variables,  
54  
55  
56  
57  
58  
59

1  
2  
3 the optimal number of clusters was determined by comparing models with between 2 and  
4  
5 5 clusters, using the Elbow method [27] and the Calinski-Harabasz index [28]. Information  
6  
7 about the methods for selecting the number of clusters are provided in the supplemental  
8  
9 material.  
10

11  
12 The following steps were performed for the final model selection: 1) all predictors  
13  
14 were assessed for correlation (**eTable 3**); and 2) ten different combinations of the  
15  
16 proposed variables were investigated. These combinations were developed based on the  
17  
18 perceived clinical importance of each variable and its combinations. All 10 models were  
19  
20 tested for the optimal number of clusters based on both the Elbow method and the  
21  
22 Calinski-Harabasz index, as described above. The models were then compared, aiming  
23  
24 for the minimum set of variables with high 60-day mortality separation. The description of  
25  
26 each model is shown in **eTable 4**.  
27  
28  
29

30  
31 Biological and clinical characteristics of the clusters were evaluated using clinical,  
32  
33 laboratory, and (when available) biomarker data to establish subphenotypes [4]. All  
34  
35 iterations in model development were done on the training set and the generalizability of  
36  
37 the final model was assessed using the validation dataset. K-means clustering analysis  
38  
39 is structured to ignore cases with missing data. No assumption was made for  
40  
41 missingness, and we therefore conducted a complete case analysis. Model development  
42  
43 and evaluation was performed using Python version 3.8 and scikit-learn 0.23.1.  
44  
45  
46  
47  
48

## 49 **Patient and public involvement**

50  
51 There was no patient involvement in this study.  
52  
53  
54  
55  
56  
57  
58  
59  
60

### Data availability

Data from the ARDSnet studies (EDEN, FACTT, ARMA, ALVEOLI and SAILS) is publicly available from the NHLBI ARDS Network and data from the ART trial can be requested from study authors.

For peer review only

## RESULTS

### Participants

Data from 4777 clinical trial patients were considered for inclusion. In total, 4 patients were excluded for having clinical measurements outside plausible range. The remaining 1998 patients from EDEN and FACTT trials were included in the training set, while the 2775 patients from ARMA, ALVEOLI, SAILS, and ART were included in the validation cohort.

Baseline characteristics of the patients in the training and validation sets are presented in **Table 1**. Pneumonia was the prevailing etiology followed by sepsis and aspiration in all trials. Between 29.3% to 72.7% of the patients were receiving vasopressors at the time of randomization. At randomization, PaO<sub>2</sub> / FiO<sub>2</sub> ratio ranged from 112 (75 - 158) to 134 (96 - 185) mmHg, and PEEP from 8 (5 - 10) to 12 (10 - 14) cmH<sub>2</sub>O across trials. Mortality at 60 days for the ARDSnet trials ranged from 22.7% to 30.1%, while in the ART trial mortality at 28 days was 58.8%.

|                        | Training set (n = 1998) |                    | Validation set (n = 2775) |                    |                    |                    |
|------------------------|-------------------------|--------------------|---------------------------|--------------------|--------------------|--------------------|
|                        | EDEN<br>(n = 1000)      | FACTT<br>(n = 998) | ALVEOLI<br>(n = 549)      | ARMA<br>(n = 472)  | ART<br>(n = 1010)  | SAILS<br>(n = 744) |
| Age, year              | 52.0 (42.0 - 63.0)      | 49.0 (38.0 - 60.8) | 50.0 (39.0 - 65.0)        | 50.0 (37.8 - 65.0) | 52.0 (36.0 - 64.0) | 55.0 (42.0 - 66.0) |
| Male gender - no. (%)  | 510 (51.0)              | 533 (53.4)         | 302 (55.0)                | 285 (60.4)         | 631 (62.5)         | 365 (49.0)         |
| Etiology - no. (%)     |                         |                    |                           |                    |                    |                    |
| Pneumonia              | 650 (65.0)              | 471 (47.2)         | 221 (40.3)                | 145 (30.7)         | 555 (55.0)         | 526 (70.7)         |
| Sepsis                 | 147 (14.7)              | 231 (23.1)         | 120 (21.9)                | 125 (26.5)         | 196 (19.4)         | 147 (19.8)         |
| Aspiration             | 96 (9.6)                | 149 (14.9)         | 84 (15.3)                 | 72 (15.3)          | 58 (5.7)           | 49 (6.6)           |
| Trauma                 | 36 (3.6)                | 74 (7.4)           | 45 (8.2)                  | 59 (12.5)          | 31 (3.1)           | 6 (0.8)            |
| Other                  | 71 (7.1)                | 73 (7.3)           | 79 (14.4)                 | 71 (15.0)          | 170 (16.8)         | 16 (2.2)           |
| Severity of illness*   | 73.0 (59.0 - 89.0)      | 78.0 (62.0 - 94.0) | 78.0 (64.0 - 93.0)        | 83.0 (70.0 - 97.0) | 63.0 (50.2 - 75.0) | 76.0 (61.0 - 92.0) |
| Vasopressors - no. (%) | 489 (48.9)              | 397 (40.5)         | 156 (29.3)                | 147 (31.3)         | 734 (72.7)         | 395 (54.2)         |
| Laboratory tests       |                         |                    |                           |                    |                    |                    |

|                                                                                                                           |                    |                    |                    |                    |                    |                    |
|---------------------------------------------------------------------------------------------------------------------------|--------------------|--------------------|--------------------|--------------------|--------------------|--------------------|
| White blood cell count, 10 <sup>9</sup> /L                                                                                | 12.0 (7.8 - 16.7)  | 11.8 (7.2 - 17.1)  | 11.6 (7.7 - 15.7)  | 11.5 (7.5 - 16.2)  | ---                | 13.9 (8.7 - 20.0)  |
| Platelets, 10 <sup>9</sup> /L                                                                                             | 169 (108 - 241)    | 183 (106 - 258)    | 157 (83 - 247)     | 135 (80 - 211)     | 175 (106 - 263)    | 167 (96 - 247)     |
| Creatinine, mg/dL                                                                                                         | 1.2 (0.8 - 2.0)    | 1.0 (0.7 - 1.5)    | 1.0 (0.7 - 1.7)    | 1.1 (0.8 - 1.7)    | 1.3 (0.8 - 2.2)    | 1.0 (0.7 - 1.7)    |
| Bilirubin, mg/dL                                                                                                          | 0.8 (0.5 - 1.4)    | 0.8 (0.5 - 1.6)    | 0.8 (0.5 - 1.5)    | 1.0 (0.6 - 2.1)    | 0.8 (0.4 - 1.5)    | 0.8 (0.5 - 1.4)    |
| Arterial blood gas                                                                                                        |                    |                    |                    |                    |                    |                    |
| pH*                                                                                                                       | 7.36 (7.30 - 7.42) | 7.37 (7.30 - 7.43) | 7.40 (7.34 - 7.44) | 7.41 (7.35 - 7.45) | 7.28 (7.19 - 7.36) | 7.37 (7.31 - 7.42) |
| PaO <sub>2</sub> , mmHg                                                                                                   | 83 (68 - 108)      | 79 (67 - 100)      | 77 (67 - 93)       | 76.5 (67 - 93)     | 112 (81 - 155)     | 83 (69 - 103)      |
| PaO <sub>2</sub> / FiO <sub>2</sub>                                                                                       | 125 (86 - 178)     | 118 (80 - 163)     | 134 (96 - 185)     | 112 (75 - 158)     | 112 (81 - 155)     | 133 (89 - 178)     |
| PaCO <sub>2</sub> , mmHg                                                                                                  | 38 (34 - 45)       | 39 (34 - 45)       | 38 (33 - 43)       | 36 (31 - 41)       | 50 (42 - 62)       | 39 (34 - 45)       |
| Bicarbonate, mmol/L                                                                                                       | 21.0 (18.0 - 25.0) | 21.0 (17.4 - 25.0) | 22.0 (18.0 - 26.0) | 22.0 (18.0 - 25.0) | 22.9 (19.4 - 26.3) | 22.0 (18.0 - 25.0) |
| Ventilatory variables                                                                                                     |                    |                    |                    |                    |                    |                    |
| Tidal volume, mL                                                                                                          | 410 (360 - 470)    | 450 (400 - 510)    | 500 (420 - 600)    | 700 (600 - 750)    | 350 (308 - 400)    | 400 (350 - 460)    |
| Per PBW, mL/kg PBW                                                                                                        | 6.3 (6.0 - 7.3)    | 7.1 (6.1 - 8.1)    | 7.9 (6.6 - 9.4)    | 10.2 (9.0 - 11.3)  | 5.9 (5.1 - 6.1)    | 6.2 (6.0 - 7.1)    |
| Plateau pressure, cmH <sub>2</sub> O                                                                                      | 24.0 (20.0 - 27.0) | 26.0 (22.0 - 30.0) | 26.0 (22.0 - 31.0) | 29.0 (24.8 - 34.0) | 26.0 (22.0 - 29.0) | 24.0 (19.0 - 28.0) |
| PEEP, cmH <sub>2</sub> O                                                                                                  | 10 (5 - 12)        | 10 (5 - 12)        | 10 (5 - 12)        | 8 (5 - 10)         | 12 (10 - 14)       | 10 (5 - 11)        |
| FiO <sub>2</sub>                                                                                                          | 0.60 (0.50 - 0.80) | 0.60 (0.50 - 0.80) | 0.60 (0.50 - 0.80) | 0.60 (0.50 - 0.74) | 0.70 (0.60 - 1.00) | 0.60 (0.40 - 0.70) |
| Clinical outcomes                                                                                                         |                    |                    |                    |                    |                    |                    |
| 28-day mort. - no. (%)                                                                                                    | ---                | ---                | ---                | ---                | 594 (58.8)         | ---                |
| 60-day mort. - no. (%)                                                                                                    | 227 (22.7)         | 268 (26.9)         | 144 (26.2)         | 141 (30.1)         | ---                | 199 (26.7)         |
| 90-day mort. - no. (%)                                                                                                    | 233 (23.3)         | 283 (28.6)         | 148 (27.5)         | 143 (30.8)         | ---                | 204 (27.4)         |
| Ventilator-free days, day 28                                                                                              | 20.0 (0.0 - 24.0)  | 17.0 (0.0 - 23.0)  | 18.0 (0.0 - 24.0)  | 13.0 (0.0 - 23.0)  | 0.0 (0.0 - 13.0)   | 20.0 (0.0 - 25.0)  |
| Ventilator days in survivors                                                                                              | 7.0 (4.0 - 13.0)   | 8.0 (5.0 - 16.0)   | 8.0 (4.0 - 14.0)   | 8.0 (4.0 - 15.0)   | 13.0 (8.0 - 20.0)  | 6.0 (4.0 - 11.0)   |
| Data are median (quartile 25th - quartile 75th) or N (%)                                                                  |                    |                    |                    |                    |                    |                    |
| Abbreviations: 28-day mort. is 28-day mortality, 60-day mort. is 60 days mortality, and 90-day mort. is 90-day mortality. |                    |                    |                    |                    |                    |                    |
| * Except for ART, that uses SAPS-3, all studies use APACHE-IV                                                             |                    |                    |                    |                    |                    |                    |

## Predictor variables and model selection

The correlation between the 15 variables selected for clustering is shown in **eTable 3**.

The strongest correlation was between PEEP and FiO<sub>2</sub> ( $r = 0.49$ ). The comparison of the 10 models regarding the optimal number of clusters based on both the Elbow method and the Calinski-Harabasz index is shown in **eFigure 1**. In all models and methods, two clusters were a better fit than a higher number of clusters.

Across the ten models, absolute mortality difference between cluster 1 and cluster 2 ranged from 3.9% to 13.1% for the FACTT study and between 0.1% to 8.1% for EDEN (eTable 4). The models with the highest 60-day absolute mortality separation between the clusters for each of the two trials in the training set were then further evaluated. Models 6, 5, and 8 were consistently amongst the models with highest separation (eTable 4). Model 8 was selected for further investigation, as it had the fewest variables (eTable 5).

### Clinical characteristics of each cluster

Based on model 8, only nine clinical and laboratory variables were needed to identify the two distinct clusters in ARDS patients, namely: heart rate, mean arterial pressure, respiratory rate, bilirubin, bicarbonate, creatinine, PaO<sub>2</sub>, arterial pH, and FiO<sub>2</sub>. For each variable in the model, opposing measurements could be observed for each cluster (Figure 1 and eFigure 2). For the ARDSnet trials, the incidence of cluster 1 patients varied from 57.8% (EDEN) to 73.6% (ARMA), and 41.5% of ART patients were part of cluster 1. Across all trials, patients in cluster 2 had higher severity of illness, rate of vasopressor, heart rate, respiratory rate, creatinine, and bilirubin, as well as lower platelets, pH, BUN, and bicarbonate compared to patients in cluster 1 (Table 2, eTables 6 and 7). In addition, 28-, 60-, and 90-day mortality rate was higher in patients in cluster 2 in all trials (Table 3). Likewise, for each trial, the number of ventilator-free days at day 28 was lower in patients in cluster 2 compared to cluster 1, and duration of ventilation in survivors was longer in cluster 1.

|  | FACTT                  |                        |            | EDEN                   |                        |            |
|--|------------------------|------------------------|------------|------------------------|------------------------|------------|
|  | Cluster 1<br>(n = 407) | Cluster 2<br>(n = 294) | p<br>value | Cluster 1<br>(n = 449) | Cluster 2<br>(n = 328) | p<br>value |



|                                                                                                                                      |                     |                    |         |                    |                     |         |
|--------------------------------------------------------------------------------------------------------------------------------------|---------------------|--------------------|---------|--------------------|---------------------|---------|
| Age, year*                                                                                                                           | 50.0 (40.0 - 63.0)  | 47.0 (36.0 - 58.0) | 0.002   | 53.0 (44.0 - 63.0) | 51.0 (41.0 - 62.2)  | 0.183   |
| Male gender - no. (%)                                                                                                                | 223 (54.8)          | 151 (51.4)         | 0.411   | 233 (51.9)         | 168 (51.2)          | 0.910   |
| Body mass index, kg/m <sup>2</sup>                                                                                                   | 27.5 (23.3 - 32.1)  | 27.4 (23.0 - 32.7) | 0.938   | 29.1 (24.6 - 34.5) | 28.5 (23.4 - 35.1)  | 0.476   |
| Caucasian - no. (%)                                                                                                                  | 269 (66.1)          | 177 (60.2)         | 0.129   | 349 (81.5)         | 237 (75.7)          | 0.067   |
| Etiology - no. (%)                                                                                                                   |                     |                    | < 0.001 |                    |                     | 0.003   |
| Pneumonia                                                                                                                            | 201 (49.4)          | 139 (47.3)         |         | 296 (65.9)         | 217 (66.2)          |         |
| Sepsis                                                                                                                               | 78 (19.2)           | 101 (34.4)         |         | 50 (11.1)          | 60 (18.3)           |         |
| Aspiration                                                                                                                           | 67 (16.5)           | 30 (10.2)          |         | 45 (10.0)          | 27 (8.2)            |         |
| Trauma                                                                                                                               | 24 (5.9)            | 8 (2.7)            |         | 24 (5.3)           | 5 (1.5)             |         |
| Other                                                                                                                                | 37 (9.1)            | 16 (5.4)           |         | 34 (7.6)           | 19 (5.8)            |         |
| Prognostic scores                                                                                                                    |                     |                    |         |                    |                     |         |
| APACHE III                                                                                                                           | 69.0 (56.0 - 84.0)  | 91 (76.0 - 105.0)  | < 0.001 | 66.0 (54.0 - 79.0) | 84.0 (71.0 - 100.2) | < 0.001 |
| Use of vasopressor - no. (%)                                                                                                         | 118 (29.5)          | 189 (64.9)         | < 0.001 | 187 (41.6)         | 209 (63.7)          | < 0.001 |
| Vital signs                                                                                                                          |                     |                    |         |                    |                     |         |
| Temperature, °C                                                                                                                      | 37.5 (36.8 - 38.2)  | 37.6 (37.0 - 38.4) | 0.371   | 37.3 (36.8 - 37.8) | 37.3 (36.7 - 38.1)  | 0.212   |
| Heart rate, bpm                                                                                                                      | 95.0 (81.0 - 110.0) | 114 (102 - 126)    | < 0.001 | 89 (77 - 102)      | 101 (89 - 116)      | < 0.001 |
| Mean arterial Pressure, mmHg                                                                                                         | 76.0 (68.0 - 88.0)  | 71.0 (65.0 - 80.8) | < 0.001 | 77.0 (68.0 - 84.0) | 71.0 (66.0 - 80.0)  | < 0.001 |
| SpO <sub>2</sub> , %                                                                                                                 | 96 (93 - 98)        | 95 (92 - 97)       | < 0.001 | 96 (94 - 98)       | 95 (92 - 98)        | 0.032   |
| Urine output in 24 hours, mL                                                                                                         | 1785 (1192 - 2853)  | 1370 (842 - 2446)  | < 0.001 | 1505 (977 - 2250)  | 1165 (566 - 1816)   | < 0.001 |
| Laboratory tests                                                                                                                     |                     |                    |         |                    |                     |         |
| Hematocrit, %                                                                                                                        | 30.0 (26.0 - 33.0)  | 30.0 (24.2 - 35.0) | 0.272   | 30.0 (26.0 - 34.0) | 30.0 (26.0 - 35.0)  | 0.919   |
| White blood cell count, 10 <sup>9</sup> /L                                                                                           | 11.6 (7.3 - 16.3)   | 11.7 (5.6 - 17.9)  | 0.972   | 11.4 (7.7 - 15.5)  | 12.7 (7.7 - 19.0)   | 0.019   |
| Platelets, 10 <sup>9</sup> /L                                                                                                        | 195 (118.5 - 268)   | 158 (87 - 237)     | < 0.001 | 163 (108 - 241)    | 164 (103 - 227)     | 0.552   |
| Creatinine, mg/dL                                                                                                                    | 0.9 (0.7 - 1.3)     | 1.4 (1.0 - 2.0)    | < 0.001 | 1.0 (0.7 - 1.5)    | 1.6 (1.0 - 2.8)     | < 0.001 |
| Bilirubin, mg/dL                                                                                                                     | 0.7 (0.5 - 1.3)     | 0.9 (0.5 - 2.0)    | 0.003   | 0.8 (0.5 - 1.3)    | 0.8 (0.5 - 1.7)     | 0.128   |
| Arterial blood gas                                                                                                                   |                     |                    |         |                    |                     |         |
| pH*                                                                                                                                  | 7.41 (7.36 - 7.45)  | 7.29 (7.23 - 7.35) | < 0.001 | 7.40 (7.35 - 7.44) | 7.30 (7.24 - 7.35)  | < 0.001 |
| PaO <sub>2</sub> , mmHg                                                                                                              | 78 (68 - 100)       | 78 (65 - 99)       | 0.240   | 83 (70 - 107)      | 81 (67 - 107)       | 0.416   |
| PaO <sub>2</sub> / FiO <sub>2</sub>                                                                                                  | 132 (92 - 173)      | 89 (65 - 126)      | < 0.001 | 133 (98 - 193)     | 101 (73 - 162)      | < 0.001 |
| PaCO <sub>2</sub> , mmHg                                                                                                             | 39 (34 - 44)        | 38.5 (33 - 47.9)   | 0.877   | 38 (34 - 44)       | 38 (33 - 46)        | 0.55    |
| Bicarbonate, mmol/L                                                                                                                  | 24.0 (21.0 - 27.0)  | 17.0 (14.0 - 20.0) | < 0.001 | 23.0 (21.0 - 26.0) | 18.5 (15.0 - 21.0)  | < 0.001 |
| Ventilatory variables                                                                                                                |                     |                    |         |                    |                     |         |
| Tidal volume, mL                                                                                                                     | 450 (400 - 530)     | 450 (382 - 500)    | 0.009   | 420 (356 - 487)    | 400 (350 - 450)     | 0.032   |
| Per PBW, mL/kg PBW                                                                                                                   | 7.1 (6.3 - 8.4)     | 7.0 (6.0, 8.0)     | 0.058   | 6.3 (6.0 - 7.5)    | 6.1 (6.0 - 7.3)     | 0.079   |
| Plateau pressure, cmH <sub>2</sub> O                                                                                                 | 25.0 (20.0 - 29.0)  | 28.0 (24.0 - 32.0) | < 0.001 | 23.0 (19.0 - 27.0) | 24.0 (21.0 - 28.0)  | 0.004   |
| PEEP, cmH <sub>2</sub> O                                                                                                             | 8 (5 - 10)          | 10 (8 - 14)        | < 0.001 | 10 (5 - 10)        | 10 (8 - 14)         | < 0.001 |
| Respiratory rate, breaths/min                                                                                                        | 22 (18 - 27)        | 30 (24 - 35)       | < 0.001 | 22 (19 - 26)       | 30 (25 - 35)        | < 0.001 |
| FiO <sub>2</sub>                                                                                                                     | 0.50 (0.40 - 0.70)  | 0.80 (0.60 - 1.00) | < 0.001 | 0.60 (0.45 - 0.70) | 0.80 (0.60 - 1.00)  | < 0.001 |
| Data are mean ± standard deviation, median (quartile 25th - quartile 75th) or N (%)                                                  |                     |                    |         |                    |                     |         |
| Abbreviations: APACHE denotes Acute Physiology and Chronic Health Evaluation, VT/PBW denotes tidal volume per predicted body weight. |                     |                    |         |                    |                     |         |

| <b>Table 3 - Clinical Outcomes According to Clusters in Each Trial</b>                                                                                                                                                                     |                   |                   |                            |                |
|--------------------------------------------------------------------------------------------------------------------------------------------------------------------------------------------------------------------------------------------|-------------------|-------------------|----------------------------|----------------|
|                                                                                                                                                                                                                                            | <b>Cluster 1</b>  | <b>Cluster 2</b>  | <b>Difference (95% CI)</b> | <b>p value</b> |
| <b>Training set</b>                                                                                                                                                                                                                        |                   |                   |                            |                |
| FACTT                                                                                                                                                                                                                                      | n = 407           | n = 294           |                            |                |
| 60-day mortality - no. (%)                                                                                                                                                                                                                 | 94 (23.1)         | 102 (34.7)        | 11.6% (4.9% to 18.3%)      | 0.001          |
| 90-day mortality - no. (%)                                                                                                                                                                                                                 | 103 (25.4)        | 106 (36.3)        | 10.9% (4.1% to 17.8%)      | 0.002          |
| Ventilator-free days at day 28                                                                                                                                                                                                             | 19.0 (0.0 - 24.0) | 10.0 (0.0 - 21.0) | -9.0 (-11.9 to -6.1)       | < 0.001        |
| Duration of ventilation in survivors, days                                                                                                                                                                                                 | 8.0 (4.0 - 13.0)  | 10.0 (7.0 - 19.0) | 2.0 (0.5 to 3.5)           | < 0.001        |
| EDEN                                                                                                                                                                                                                                       | n = 449           | n = 328           |                            |                |
| 60-day mortality - no. (%)                                                                                                                                                                                                                 | 87 (19.4)         | 90 (27.4)         | 8.1% (2.1% to 14.0%)       | 0.010          |
| 90-day mortality - no. (%)                                                                                                                                                                                                                 | 90 (20.0)         | 93 (28.4)         | 8.3% (2.3% to 14.3%)       | 0.009          |
| Ventilator-free days at day 28                                                                                                                                                                                                             | 21.0 (0.0 - 25.0) | 15.0 (0.0 - 22.2) | -6.0 (-8.1 to -3.9)        | < 0.001        |
| Duration of ventilation in survivors, days                                                                                                                                                                                                 | 6.0 (4.0 - 11.0)  | 8.0 (6.0 - 18.0)  | 2.0 (0.9 to 3.1)           | < 0.001        |
| <b>Validation set</b>                                                                                                                                                                                                                      |                   |                   |                            |                |
| ALVEOLI                                                                                                                                                                                                                                    | n = 336           | n = 157           |                            |                |
| 60-day mortality - no. (%)                                                                                                                                                                                                                 | 59 (17.6)         | 68 (43.3)         | 25.8% (17.7% to 33.8%)     | < 0.001        |
| 90-day mortality - no. (%)                                                                                                                                                                                                                 | 60 (18.1)         | 70 (45.5)         | 27.3% (19.2% to 35.5%)     | < 0.001        |
| Ventilator-free days at day 28                                                                                                                                                                                                             | 21.0 (4.8 - 25.0) | 2.0 (0.0 - 19.0)  | -19.0 (-20.8 to -17.2)     | < 0.001        |
| Duration of ventilation in survivors, days                                                                                                                                                                                                 | 7.0 [4.0,13.0]    | 11.0 (6.0 - 22.2) | 4.0 (2.1 to 5.9)           | < 0.001        |
| ARMA                                                                                                                                                                                                                                       | n = 279           | n = 100           |                            |                |
| 60-day mortality - no. (%)                                                                                                                                                                                                                 | 69 (24.8)         | 42 (42.0)         | 17.2% (6.9% to 27.5%)      | 0.002          |
| 90-day mortality - no. (%)                                                                                                                                                                                                                 | 70 (25.5)         | 42 (42.0)         | 16.5% (6.0% to 26.9%)      | 0.003          |
| Ventilator-free days at day 28                                                                                                                                                                                                             | 17.0 (0.0 - 24.0) | 2.0 (0.0 - 19.0)  | -15.0 (-18.6 to -11.4)     | < 0.001        |
| Duration of ventilation in survivors, days                                                                                                                                                                                                 | 7.0 (4.0 - 13.8)  | 11.0 (5.0 - 18.0) | 4.0 (1.5 to 6.5)           | 0.018          |
| SAILS                                                                                                                                                                                                                                      | n = 319           | n = 188           |                            |                |
| 60-day mortality - no. (%)                                                                                                                                                                                                                 | 80 (25.1)         | 60 (31.9)         | 6.8% (-1.2% to 14.9%)      | 0.119          |
| 90-day mortality - no. (%)                                                                                                                                                                                                                 | 81 (25.4)         | 63 (33.5)         | 8.1% (0.0% to 16.3%)       | 0.063          |
| Ventilator-free days at day 28                                                                                                                                                                                                             | 21.0 (0.0 - 25.0) | 16.0 (0.0 - 23.0) | -5.0 (-7.3 to -2.7)        | < 0.001        |
| Duration of ventilation in survivors, days                                                                                                                                                                                                 | 6.0 (3.0 - 10.0)  | 8.0 (5.0 - 14.0)  | 2.0 (0.7 to 3.3)           | < 0.001        |
| ART                                                                                                                                                                                                                                        | n = 211           | n = 298           |                            |                |
| 28-day mortality - no. (%)                                                                                                                                                                                                                 | 81 (38.4)         | 180 (60.4)        | 22.0% (13.4% to 30.7%)     | < 0.001        |
| Ventilator-free days at day 28                                                                                                                                                                                                             | 0.0 (0.0 - 17.0)  | 0.0 (0.0 - 7.8)   | -0.0 (-1.0 to 1.0)         | < 0.001        |
| Duration of ventilation in survivors, days                                                                                                                                                                                                 | 12.0 (8.0 - 20.0) | 13.5 (8.0 - 20.0) | 2.0 (-0.3 to 4.2)          | 0.570          |
| Data are median (quartile 25th - quartile 75th) or N (%). Difference is mean difference with (95% CI) for binomial variables and median difference with (95% CI) for continuous variables<br>Abbreviations: CI is the confidence interval. |                   |                   |                            |                |

## Identification of Subphenotypes

After comparing the clinical characteristics of the clusters, each cluster was assigned to represent a distinct subphenotype of ARDS, with patients in cluster 1 assigned to

1  
2  
3 subphenotype A, and patients in cluster 2 assigned to subphenotype B. Using blood  
4  
5 biomarker information available for a subset of patients from both ARMA and ALVEOLI,  
6  
7 subphenotype B showed increased levels of pro-inflammatory markers when compared  
8  
9  
10 to subphenotype A (**Figure 2** and **eTables 8 and 9**).

11  
12  
13  
14  
15  
16  
17  
18  
19  
20  
21  
22  
23  
24  
25  
26  
27  
28  
29  
30  
31  
32  
33  
34  
35  
36  
37  
38  
39  
40  
41  
42  
43  
44  
45  
46  
47  
48  
49  
50  
51  
52  
53  
54  
55  
56  
57  
58  
59  
60

For peer review only

## DISCUSSION

This study successfully demonstrated that nine easily obtainable clinical variables: arterial pH, partial O<sub>2</sub> pressure, creatinine, bilirubin, bicarbonate, mean arterial pressure, heart rate, respiratory rate, and FiO<sub>2</sub> at the time of study enrollment can identify two distinct ARDS subphenotypes with different clinical and biologic characteristics as well as outcomes across the test and validation cohorts. There was good generalizability amongst diverse populations from multiple validation datasets with temporal and geographical differences.

It is understandable that researchers feel compelled to use as much information as possible to build robust models. This is supportable for two main reasons: (1) the well-known heterogeneity of complex syndromes such as ARDS and (2) the abundance of highly granular clinical data generated by electronic health records (EHRs). It is anticipated that analyzing this vast amount of data will provide new knowledge regarding disease mechanisms by enabling researchers to find plausible hidden patterns within the data [29]. However, this data-heavy approach has the potential drawback of using predictors which are not generally obtained in a time window prior to intervention, or worse yet, using variables that are not part of the routine standard of care for patients. The rationale of using fewer and easy to collect clinical variables is not new in the field of critical care. Prognostic models have already shown that it is indeed feasible to create meaningful models using fewer predictors [30,31].

Unfortunately, unlike supervised algorithms (e.g., regression analyses), unsupervised algorithms such as K-means clustering do not provide one straightforward and established metric to describe feature importance. In that sense, our approach of

1  
2  
3 testing multiple sets of variables was also meant to select features that were most likely  
4 to be relevant, serving as surrogate for the feature selection step normally employed in  
5 supervised algorithms. While each individual variable by itself may not be significantly  
6 different across sub-phenotypes, their interaction in the 9-dimensional space of our model  
7 may be relevant.  
8  
9

10  
11  
12 Our initial choices to define variables commonly found in the EHR at ARDS  
13 diagnosis was inspired by a recent report from the World Health Organization (WHO)  
14 which showed an enormous discrepancy of medical devices availability in a survey across  
15 135 countries [29]. Recognizing this inconsistency is essential for widespread  
16 implementation of machine learning models regardless of varying availability of resources  
17 across countries and health systems [29]. The aim is to provide clinically relevant  
18 information within a defined and short period that might impact the delivery of effective  
19 interventions to the right patient population and to as many patients as possible [29].  
20  
21  
22  
23  
24  
25  
26  
27  
28  
29  
30  
31  
32

33 Recently, Sinha *et al.* developed supervised-learning gradient boosted classifier  
34 models trained using 24 or 14 readily available clinical data elements to reproduce  
35 biomarker-derived subphenotypes which were previously identified by Calfee *et al.* [17].  
36 Unlike Sinha *et al.*, who predicted previously identified subphenotypes, our study has  
37 identified two subphenotypes *de novo* using a small set of clinical variables.  
38  
39  
40  
41  
42  
43

44 Although the subphenotypes that we have identified and those that have been  
45 previously published look similar, our work is distinct from previous studies in several  
46 ways. We employed different training and validation datasets as well as a different and  
47 well-established unsupervised learning technique. Moreover, we utilized a process for  
48 selecting predictors which is not comparable to previous studies. Acknowledging these  
49  
50  
51  
52  
53  
54  
55  
56  
57  
58  
59  
60

1  
2  
3 differences is crucial. It would not be unexpected to assume that these deviations would  
4 be relevant enough to produce different subphenotypes [32]. However, the clinical,  
5 laboratory characteristics, and the clinical outcomes of our subphenotypes show that they  
6 are remarkably similar to subphenotypes found in previous papers, regardless of  
7 methodological differences.  
8  
9  
10  
11  
12  
13

14  
15 At this point it is not possible to go beyond this comparative analysis, as there is  
16 no gold standard definition of ARDS subphenotypes [32]. Nonetheless, our work does  
17 provide robust evidence that ARDS does indeed have two subphenotypes that can be  
18 systematically identified, despite major differences in population assessed and  
19 methodological approach used compared with previous studies. It also reinforces that we  
20 should continue to explore the underlying biological pathways of such subphenotypes to  
21 find responders to new or previously tested therapies.  
22  
23  
24  
25  
26  
27  
28  
29

30  
31 Our study has several strengths. First, it is the largest cohort of patients that has  
32 been studied to develop distinct subphenotypes of ARDS patients. Moreover, our  
33 validation cohort included patients from the ART trial, allowing us to validate our model in  
34 the contemporaneous population of a large international randomized clinical trial in  
35 addition to the ARDSnet studies used in other subphenotyping studies. Second, our  
36 subphenotyping model was developed exclusively on the training set and then validated  
37 across multiple separate datasets. Nevertheless, similar separation in mortality was seen  
38 between the two subphenotypes across all trials. Third, we used the K-means algorithm  
39 to identify our subphenotypes, and the results obtained with this technique can be easily  
40 interpreted by clinicians and implemented in clinical practice. Lastly, this is the first  
41 phenotyping study that has used easily available clinical variables to identify ARDS  
42  
43  
44  
45  
46  
47  
48  
49  
50  
51  
52  
53  
54  
55  
56  
57  
58  
59  
60

1  
2  
3 phenotypes *de novo*, which allows for early identification of these patients in the clinical  
4 care at the bedside. Using this algorithm with a small number of routinely collected  
5 variables could enable our model to be applied in trials that either retrospectively or  
6 prospectively assess interventions targeted to each subphenotype.  
7  
8  
9  
10  
11

12 This study also has limitations. First, we have developed our models exclusively  
13 on patients enrolled in clinical trials. Due to the strict inclusion and exclusion criteria of  
14 these clinical trials, the generalizability of these results needs to be evaluated in  
15 unselected ARDS populations. Although there are clear clinical and biomarker differences  
16 between the identified subphenotypes, the model's clinical utility needs to be  
17 prospectively validated and further investigated. Additionally, our biomarker analysis is  
18 limited to those patients in which the data was made publicly available by the study  
19 authors, but future collection of biomarker data in a prospective study will allow more  
20 robust understanding of the underlying biology and validation of the subphenotype model.  
21 Also, K-means clustering does not handle missing data, and no approach was used to  
22 impute missing values. However, the extremely low rate of missingness in our study  
23 makes this issue less relevant. Lastly, future work should analyze previous trials to  
24 identify possible differential treatment responses for the subphenotypes of ARDS patients  
25 identified in this study.  
26  
27  
28  
29  
30  
31  
32  
33  
34  
35  
36  
37  
38  
39  
40  
41  
42  
43

## 44 **CONCLUSIONS**

45 This study confirms the existence of two distinct subphenotypes in ARDS patients using  
46 a novel clustering model on routinely collected clinical data. This work may allow for easier  
47 identification of ARDS subphenotypes to facilitate implementation of precision clinical trial  
48  
49  
50  
51  
52  
53  
54  
55  
56  
57  
58  
59  
60

1  
2  
3  
4  
5  
6  
7  
8  
9  
10  
11  
12  
13  
14  
15  
16  
17  
18  
19  
20  
21  
22  
23  
24  
25  
26  
27  
28  
29  
30  
31  
32  
33  
34  
35  
36  
37  
38  
39  
40  
41  
42  
43  
44  
45  
46  
47  
48  
49  
50  
51  
52  
53  
54  
55  
56  
57  
58  
59  
60

enrollment and development of targeted therapies in a variety of settings without the added burdens of biomarker evaluation.

For peer review only



## DECLARATIONS

**Funding:** This research received no specific grant from any funding agency in the public, commercial or not-for-profit sectors.

**Competing Interest:** AD, MS, FGZ, ABC, ISM, DMP, LNL declare no relevant financial conflicts of interest. RK, EVA, LB, JO, DR and ROD are employees of Endpoint Health, Inc. ASN reported receiving personal fees from Dräger unrelated to the submitted work.

**Ethics Approval:** All patients provided informed consent in the original trials. This secondary analysis study was exempt from IRB review because it does not meet the definition of human subject as defined in 45 CFR 46.102. WIRB Work Order #1-1228617-1

**Availability of data and material:** Data from the ARDSnet studies (EDEN, FACTT, ARMA, ALVEOLI) may be requested from the NIH-NHLBI BioLINCC repository. These are available by application through the BioLINCC website ([https://biolincc.nhlbi.nih.gov/resource\\_overview/](https://biolincc.nhlbi.nih.gov/resource_overview/)), subject to established review processes for their distribution to qualified investigators and data from the ART trial can be requested from study authors.

**Author Contributions:** AD, RK, EVA, LB participated in study design and analysis, drafted, and revised the manuscript, and are the guarantor of the document. MS, DR, JO, FGZ, ABC, ISM, DMP, LNL, and ASN participated in interpretation of data analysis, drafted the manuscript, and revised it for critically important intellectual content. ROD participated in the study design, analysis, interpretation of data analysis, and final revision of the manuscript content.

1  
2  
3  
4  
5  
6  
7  
8  
9  
10  
11  
12  
13  
14  
15  
16  
17  
18  
19  
20  
21  
22  
23  
24  
25  
26  
27  
28  
29  
30  
31  
32  
33  
34  
35  
36  
37  
38  
39  
40  
41  
42  
43  
44  
45  
46  
47  
48  
49  
50  
51  
52  
53  
54  
55  
56  
57  
58  
59  
60

**Twitter:** @msiuba, @f\_g\_zampieri, @rod\_deliberato, @a\_serpaneto, @l\_bulgarelli,  
@endpointhealth

For peer review only

## REFERENCES

- 1 ARDS Definition Task Force, Ranieri VM, Rubenfeld GD, *et al.* Acute respiratory distress syndrome: the Berlin Definition. *JAMA* 2012;**307**:2526–33. doi:10.1001/jama.2012.5669
- 2 Thille AW, Esteban A, Fernández-Segoviano P, *et al.* Comparison of the Berlin Definition for Acute Respiratory Distress Syndrome with Autopsy. *Am J Respir Crit Care Med* 2013;**187**:761–7. doi:10.1164/rccm.201211-1981OC
- 3 Reilly J, Calfee C, Christie J. Acute Respiratory Distress Syndrome Phenotypes. *Semin Respir Crit Care Med* 2019;**40**:019–30. doi:10.1055/s-0039-1684049
- 4 Reddy K, Sinha P, O’Kane CM, *et al.* Subphenotypes in critical care: translation into clinical practice. *The Lancet Respiratory Medicine* 2020;**8**:631–43. doi:10.1016/S2213-2600(20)30124-7
- 5 Shankar-Hari M, Fan E, Ferguson ND. Acute respiratory distress syndrome (ARDS) phenotyping. *Intensive Care Med* 2019;**45**:516–9. doi:10.1007/s00134-018-5480-6
- 6 Calfee CS, Delucchi K, Parsons PE, *et al.* Subphenotypes in acute respiratory distress syndrome: latent class analysis of data from two randomised controlled trials. *The Lancet Respiratory Medicine* 2014;**2**:611–20. doi:10.1016/S2213-2600(14)70097-9
- 7 Famous KR, Delucchi K, Ware LB, *et al.* Acute Respiratory Distress Syndrome Subphenotypes Respond Differently to Randomized Fluid Management Strategy. *Am J Respir Crit Care Med* 2017;**195**:331–8. doi:10.1164/rccm.201603-0645OC
- 8 Calfee CS, Delucchi KL, Sinha P, *et al.* Acute respiratory distress syndrome subphenotypes and differential response to simvastatin: secondary analysis of a randomised controlled trial. *The Lancet Respiratory Medicine* 2018;**6**:691–8. doi:10.1016/S2213-2600(18)30177-2
- 9 for the NHLBI ARDS Network, Sinha P, Delucchi KL, *et al.* Latent class analysis of ARDS subphenotypes: a secondary analysis of the statins for acutely injured lungs from sepsis (SAILS) study. *Intensive Care Med* 2018;**44**:1859–69. doi:10.1007/s00134-018-5378-3
- 10 Bos LD, Schouten LR, van Vught LA, *et al.* Identification and validation of distinct biological phenotypes in patients with acute respiratory distress syndrome by cluster analysis. *Thorax* 2017;**72**:876–83. doi:10.1136/thoraxjnl-2016-209719
- 11 Ferguson ND, Fan E, Camporota L, *et al.* The Berlin definition of ARDS: an expanded rationale, justification, and supplementary material. *Intensive Care Med* 2012;**38**:1573–82. doi:10.1007/s00134-012-2682-1

- 1
  - 2
  - 3
  - 4
  - 5
  - 6
  - 7
  - 8
  - 9
  - 10
  - 11
  - 12
  - 13
  - 14
  - 15
  - 16
  - 17
  - 18
  - 19
  - 20
  - 21
  - 22
  - 23
  - 24
  - 25
  - 26
  - 27
  - 28
  - 29
  - 30
  - 31
  - 32
  - 33
  - 34
  - 35
  - 36
  - 37
  - 38
  - 39
  - 40
  - 41
  - 42
  - 43
  - 44
  - 45
  - 46
  - 47
  - 48
  - 49
  - 50
  - 51
  - 52
  - 53
  - 54
  - 55
  - 56
  - 57
  - 58
  - 59
  - 60
- 12 Bellani G, Laffey JG, Pham T, *et al.* Epidemiology, Patterns of Care, and Mortality for Patients With Acute Respiratory Distress Syndrome in Intensive Care Units in 50 Countries. *JAMA* 2016;**315**:788. doi:10.1001/jama.2016.0291
- 13 Gattinoni L, Vassalli F, Romitti F. Benefits and risks of the P/F approach. *Intensive Care Med* 2018;**44**:2245–7. doi:10.1007/s00134-018-5413-4
- 14 Matthay MA, Arabi YM, Siegel ER, *et al.* Phenotypes and personalized medicine in the acute respiratory distress syndrome. *Intensive Care Med* 2020;**46**:2136–52. doi:10.1007/s00134-020-06296-9
- 15 Shankar-Hari M, Rubenfeld GD. Population enrichment for critical care trials: phenotypes and differential outcomes. *Current Opinion in Critical Care* 2019;**25**:489–97. doi:10.1097/MCC.0000000000000641
- 16 Sinha P, Delucchi KL, McAuley DF, *et al.* Development and validation of parsimonious algorithms to classify acute respiratory distress syndrome phenotypes: a secondary analysis of randomised controlled trials. *The Lancet Respiratory Medicine* 2020;**8**:247–57. doi:10.1016/S2213-2600(19)30369-8
- 17 Sinha P, Churpek MM, Calfee CS. Machine Learning Classifier Models Can Identify Acute Respiratory Distress Syndrome Phenotypes Using Readily Available Clinical Data. *Am J Respir Crit Care Med* 2020;**202**:996–1004. doi:10.1164/rccm.202002-0347OC
- 18 Kitsios GD, Yang L, Manatakis DV, *et al.* Host-Response Subphenotypes Offer Prognostic Enrichment in Patients With or at Risk for Acute Respiratory Distress Syndrome\*: *Critical Care Medicine* 2019;**47**:1724–34. doi:10.1097/CCM.0000000000004018
- 19 The National Heart, Lung, and Blood Institute Acute Respiratory Distress Syndrome (ARDS) Clinical Trials Network. Ventilation with Lower Tidal Volumes as Compared with Traditional Tidal Volumes for Acute Lung Injury and the Acute Respiratory Distress Syndrome. *N Engl J Med* 2000;**342**:1301–8. doi:10.1056/NEJM200005043421801
- 20 The National Heart, Lung, and Blood Institute Acute Respiratory Distress Syndrome (ARDS) Clinical Trials Network. Higher versus Lower Positive End-Expiratory Pressures in Patients with the Acute Respiratory Distress Syndrome. *N Engl J Med* 2004;**351**:327–36. doi:10.1056/NEJMoa032193
- 21 The National Heart, Lung, and Blood Institute Acute Respiratory Distress Syndrome (ARDS) Clinical Trials Network. Pulmonary-Artery versus Central Venous Catheter to Guide Treatment of Acute Lung Injury. *N Engl J Med* 2006;**354**:2213–24. doi:10.1056/NEJMoa061895
- 22 The National Heart, Lung, and Blood Institute Acute Respiratory Distress Syndrome (ARDS) Clinical Trials Network, Rice TW, Wheeler AP, *et al.* Initial Trophic vs Full

- 1  
2  
3 Enteral Feeding in Patients With Acute Lung Injury: The EDEN Randomized Trial.  
4 *JAMA: The Journal of the American Medical Association* 2012;**307**:795–803.  
5 doi:10.1001/jama.2012.137  
6
- 7  
8 23 The National Heart, Lung, and Blood Institute ARDS Clinical Trials Network.  
9 Rosuvastatin for Sepsis-Associated Acute Respiratory Distress Syndrome. *N Engl J*  
10 *Med* 2014;**370**:2191–200. doi:10.1056/NEJMoa1401520  
11
- 12 24 Writing Group for the Alveolar Recruitment for Acute Respiratory Distress Syndrome  
13 Trial (ART) Investigators, Cavalcanti AB, Suzumura ÉA, *et al.* Effect of Lung  
14 Recruitment and Titrated Positive End-Expiratory Pressure (PEEP) vs Low PEEP on  
15 Mortality in Patients With Acute Respiratory Distress Syndrome: A Randomized  
16 Clinical Trial. *JAMA* 2017;**318**:1335. doi:10.1001/jama.2017.14171  
17
- 18  
19 25 Yehya N, Harhay MO, Curley MAQ, *et al.* Reappraisal of Ventilator-Free Days in  
20 Critical Care Research. *Am J Respir Crit Care Med* 2019;**200**:828–36.  
21 doi:10.1164/rccm.201810-2050CP  
22
- 23 26 Castela Forte J, Perner A, van der Horst ICC. The use of clustering algorithms in  
24 critical care research to unravel patient heterogeneity. *Intensive Care Med*  
25 2019;**45**:1025–8. doi:10.1007/s00134-019-05631-z  
26
- 27  
28 27 Ketchen DJ, Shook CL. The Application of Cluster Analysis in Strategic  
29 Management Research: An Analysis and Critique. *Strategic Management Journal*  
30 1996;**17**:441–58. doi:https://doi.org/10.1002/(SICI)1097-  
31 0266(199606)17:6<441::AID-SMJ819>3.0.CO;2-G  
32
- 33 28 Caliński T, Harabasz J. A dendrite method for cluster analysis. *Communications in*  
34 *Statistics* 1974;**3**:1–27. doi:10.1080/03610927408827101  
35
- 36  
37 29 Bulgarelli L, Deliberato RO, Johnson AEW. Prediction on critically ill patients: The  
38 role of “big data.” *Journal of Critical Care* 2020;**60**:64–8.  
39 doi:10.1016/j.jcrc.2020.07.017  
40
- 41 30 Johnson AEW, Kramer AA, Clifford GD. A New Severity of Illness Scale Using a  
42 Subset of Acute Physiology and Chronic Health Evaluation Data Elements Shows  
43 Comparable Predictive Accuracy\*: *Critical Care Medicine* 2013;**41**:1711–8.  
44 doi:10.1097/CCM.0b013e31828a24fe  
45
- 46  
47 31 Deliberato RO, Escudero GG, Bulgarelli L, *et al.* SEVERITAS: An externally  
48 validated mortality prediction for critically ill patients in low and middle-income  
49 countries. *International Journal of Medical Informatics* 2019;**131**:103959.  
50 doi:10.1016/j.ijmedinf.2019.103959  
51
- 52 32 DeMerle KM, Angus DC, Baillie JK, *et al.* Sepsis Subclasses: A Framework for  
53 Development and Interpretation. *Crit Care Med* Published Online First: 15 February  
54 2021. doi:10.1097/CCM.0000000000004842  
55  
56  
57  
58  
59  
60

## FIGURES LEGENDS

### **Figure 1 - Differences of the Variables Included in the Cluster Algorithm Among Clusters**

Square symbols represent the study with the highest mean z score for each phenotype; Circles represent the study with the lowest mean z score for each phenotype. The colored bands are exclusively to help visualize the opposite trends of the variables on the different clusters; Art.pH: arterial pH; Bicarb: bicarbonate; MAP: mean arterial pressure; Creat: creatinine; Resp.Rate: respiratory rate

### **Figure 2 - Heat Map of the Biomarkers Available for the ARMA and ALVEOLI Trials**

For better visualization and due to difference in scales, the values were log-normalized and z-scored. Subphenotypes A and B are shown separately to highlight their differences.

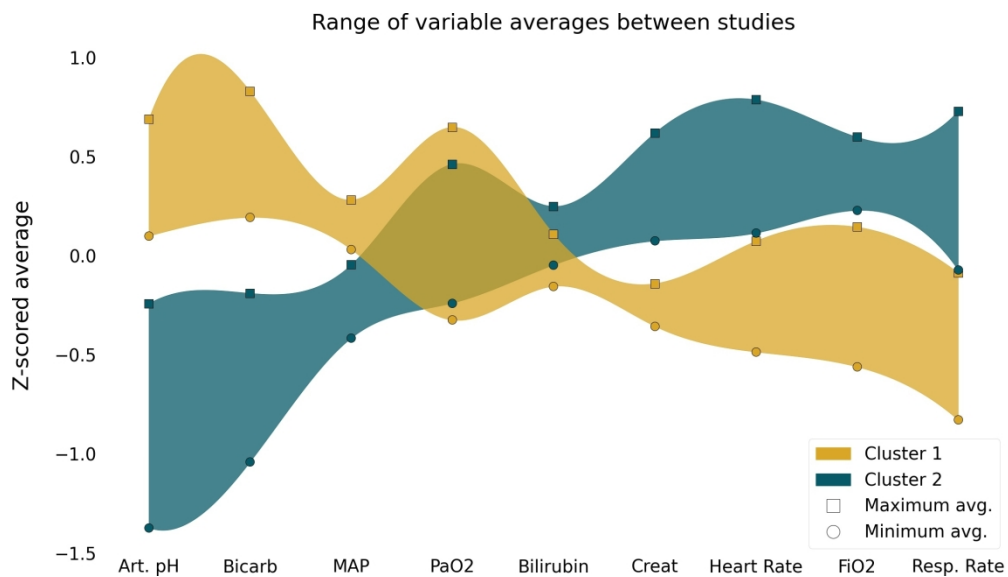

Figure 1 - Differences of the Variables Included in the Cluster Algorithm Among Clusters

812x457mm (72 x 72 DPI)

1  
2  
3  
4  
5  
6  
7  
8  
9  
10  
11  
12  
13  
14  
15  
16  
17  
18  
19  
20  
21  
22  
23  
24  
25  
26  
27  
28  
29  
30  
31  
32  
33  
34  
35  
36  
37  
38  
39  
40  
41  
42  
43  
44  
45  
46  
47  
48  
49  
50  
51  
52  
53  
54  
55  
56  
57  
58  
59  
60

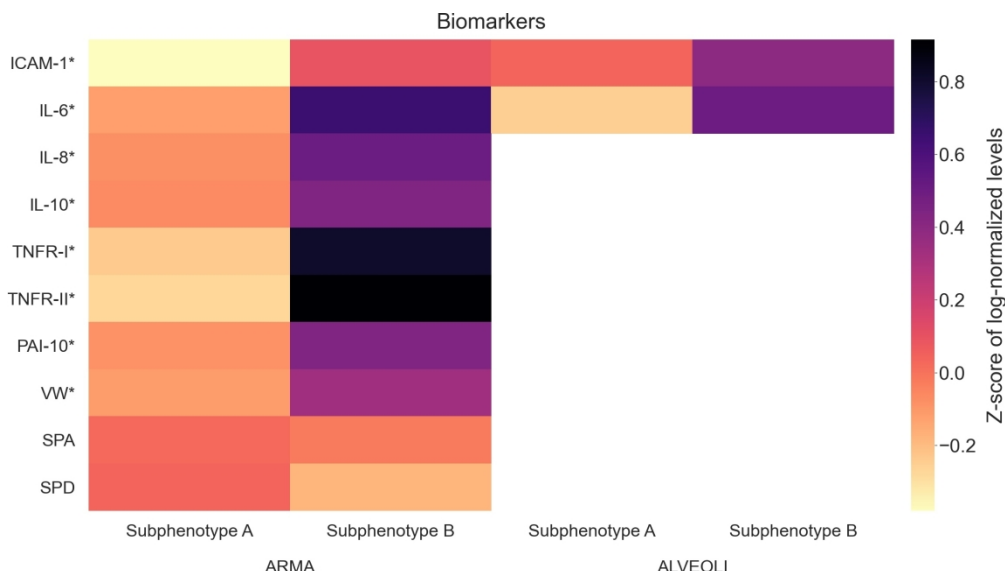

Figure 2 - Heat Map of the Biomarkers Available for the ARMA and ALVEOLI Trials

812x457mm (72 x 72 DPI)



1  
2  
3  
4  
5  
6  
7  
8  
9  
10  
11  
12  
13  
14  
15  
16  
17  
18  
19  
20  
21  
22  
23  
24  
25  
26  
27  
28  
29  
30  
31  
32  
33  
34  
35  
36  
37  
38  
39  
40  
41  
42  
43  
44  
45  
46  
47  
48  
49  
50  
51  
52  
53  
54  
55  
56  
57  
58  
59  
60

**Identification of Acute Respiratory Distress  
Syndrome subphenotypes de novo using routine  
clinical data: a retrospective analysis of ARDS  
clinical trials**

ONLINE SUPPLEMENT

## Additional Methods

### *Number of clusters*

The optimal number of clusters was chosen according to two criteria: (1) Elbow method, by selecting a number of clusters that if further increased will result in only a small increase in performance and possibly cause overfit, hence this number is commonly referenced as to being in the “elbow” of the curve (**eFigure 1**); and (2) Calinski-Harabasz index, consisting of the ratio of *within* to *between* cluster dispersion; higher scores are indication of dense and well separated clusters (**e-Figure 1**).

### *Ventilator-free days*

Ventilator free days for ALVEOLI, EDEN, FACTT, and SAILS were calculated according to the methods outlined by Yehya et al (1). Briefly, patients who died at any time in the 28 days were assigned 0 ventilator-free days. For survivors, the number of ventilator-free days was calculated based on the date of the final successful extubation; reintubations before the final extubation were not counted toward ventilator-free days. All days after a patient was discharged home up to the 28<sup>th</sup> day with unassisted breathing were assumed to be ventilator-free days.

**eTable 1 - Percentage of missing data in the routinely collected variables, closest randomization, on EDEN and FACTT trials.**

|                                  | <b>EDEN<br/>(n = 1000)</b> | <b>FACTT<br/>(n = 999)</b> |
|----------------------------------|----------------------------|----------------------------|
| Age                              | 0.0                        | 0.0                        |
| Gender                           | 0.0                        | 0.0                        |
| Arterial pH                      | 2.8                        | 3.9                        |
| Bicarbonate                      | 0.2                        | 1.5                        |
| Bilirubin                        | 8.1                        | 26.8                       |
| Creatinine                       | 0.0                        | 0.0                        |
| FiO <sub>2</sub>                 | 0.8                        | 0.6                        |
| Heart Rate                       | 0.0                        | 0.1                        |
| Height                           | 0.1                        | 0.9                        |
| Mean Arterial Pressure           | 12.1                       | 0.8                        |
| PaCO <sub>2</sub>                | 2.8                        | 3.9                        |
| PaO <sub>2</sub>                 | 0.2                        | 4.0                        |
| Positive end-expiratory pressure | 1.0                        | 0.3                        |
| Platelets                        | 8.1                        | 6.0                        |
| Plateau pressure                 | 32.3                       | 30.9                       |
| Respiratory rate                 | 0.6                        | 0.4                        |
| Tidal volume                     | 15.3                       | 12.1                       |
| Tidal volume per PBW             | 15.4                       | 12.8                       |

**eTable 2 - Plausible physiological ranges for clinical measurements, closest to time of randomization**

| Variables                              | Lower Limit | Upper Limit |
|----------------------------------------|-------------|-------------|
| Age (years)                            | 16          | 89          |
| Arterial pH                            | 6.65        | 7.80        |
| Bicarbonate (mEq/L)                    | 1           | 50          |
| Bilirubin (mg/dL)                      | 0.1         | 50          |
| Creatinine (mg/dL)                     | 0.1         | 20          |
| FiO <sub>2</sub>                       | 0.21        | 1           |
| Heart Rate (beats per minute)          | 20          | 300         |
| Height (cm)                            | 120         | 220         |
| Mean arterial pressure (mmHg)          | 10          | 400         |
| PaCO <sub>2</sub> (mmHg)               | 20          | 120         |
| PaO <sub>2</sub> / FiO <sub>2</sub>    | 0           | 500         |
| PaO <sub>2</sub> (mmHg)                | 30          | 500         |
| PEEP (cm H <sub>2</sub> O)             | 0           | 60          |
| Platelets (thousands)                  | 1           | 1000        |
| Plateau Pressure (cm H <sub>2</sub> O) | 10          | 50          |
| Respiratory Rate (resp per minute)     | 1           | 100         |
| Tidal Volume (cm H <sub>2</sub> O)     | 100         | 1400        |

**eTable 3 - Correlation among fifteen routinely collected variables, close to the time of randomization.**

|                     | Age   | pH    | HCO <sub>3</sub> | Bili  | Creat | FiO <sub>2</sub> | Gender | HR    | MAP   | PaCO <sub>2</sub> | PaO <sub>2</sub> | PEEP  | Plat  | RR    | V <sub>T</sub> /PBW |
|---------------------|-------|-------|------------------|-------|-------|------------------|--------|-------|-------|-------------------|------------------|-------|-------|-------|---------------------|
| Age                 | 1.00  | 0.06  | -0.04            | -0.02 | 0.11  | -0.13            | 0.00   | -0.27 | -0.12 | -0.11             | -0.06            | -0.22 | 0.00  | -0.11 | 0.03                |
| pH                  | 0.06  | 1.00  | 0.40             | -0.04 | -0.16 | -0.26            | -0.01  | -0.18 | 0.15  | -0.39             | 0.00             | -0.20 | 0.05  | -0.21 | 0.07                |
| HCO <sub>3</sub>    | -0.04 | 0.40  | 1.00             | -0.08 | -0.28 | -0.05            | -0.02  | -0.18 | 0.08  | 0.44              | 0.02             | -0.05 | 0.15  | -0.24 | -0.07               |
| Bili                | -0.02 | -0.04 | -0.08            | 1.00  | 0.06  | -0.03            | -0.04  | 0.01  | -0.04 | -0.01             | 0.03             | 0.01  | -0.20 | 0.04  | -0.01               |
| Creat               | 0.11  | -0.16 | -0.28            | 0.06  | 1.00  | -0.04            | -0.08  | -0.04 | -0.01 | -0.14             | 0.00             | -0.06 | -0.12 | 0.02  | 0.00                |
| FiO <sub>2</sub>    | -0.13 | -0.26 | -0.05            | -0.03 | -0.04 | 1.00             | 0.03   | 0.13  | -0.06 | 0.18              | 0.11             | 0.49  | 0.06  | 0.21  | -0.02               |
| Gender              | 0.00  | -0.01 | -0.02            | -0.04 | -0.08 | 0.03             | 1.00   | -0.03 | -0.05 | -0.04             | -0.06            | 0.02  | 0.09  | 0.09  | 0.19                |
| HR                  | -0.27 | -0.18 | -0.18            | 0.01  | -0.04 | 0.13             | -0.03  | 1.00  | -0.02 | 0.03              | -0.04            | 0.12  | -0.05 | 0.22  | 0.08                |
| MAP                 | -0.12 | 0.15  | 0.08             | -0.04 | -0.01 | -0.06            | -0.05  | -0.02 | 1.00  | -0.03             | 0.01             | -0.01 | 0.06  | -0.04 | 0.00                |
| PaCO <sub>2</sub>   | -0.11 | -0.39 | 0.44             | -0.01 | -0.14 | 0.18             | -0.04  | 0.03  | -0.03 | 1.00              | -0.04            | 0.17  | 0.11  | -0.05 | -0.17               |
| PaO <sub>2</sub>    | -0.06 | 0.00  | 0.02             | 0.03  | 0.00  | 0.11             | -0.06  | -0.04 | 0.01  | -0.04             | 1.00             | -0.09 | -0.04 | -0.09 | 0.03                |
| PEEP                | -0.22 | -0.20 | -0.05            | 0.01  | -0.06 | 0.49             | 0.02   | 0.12  | -0.01 | 0.17              | -0.09            | 1.00  | 0.00  | 0.33  | -0.15               |
| Plat                | 0.00  | 0.05  | 0.15             | -0.20 | -0.12 | 0.06             | 0.09   | -0.05 | 0.06  | 0.11              | -0.04            | 0.00  | 1.00  | -0.05 | 0.03                |
| RR                  | -0.11 | -0.21 | -0.24            | 0.04  | 0.02  | 0.21             | 0.09   | 0.22  | -0.04 | -0.05             | -0.09            | 0.33  | -0.05 | 1.00  | -0.31               |
| V <sub>T</sub> /PBW | 0.03  | 0.07  | -0.07            | -0.01 | 0.00  | -0.02            | 0.19   | 0.08  | 0.00  | -0.17             | 0.03             | -0.15 | 0.03  | -0.31 | 1.00                |

Data are Pearson correlation coefficients.

Abbreviations: Bili denotes bilirubin, Creat is creatinine, HR is heart rate, MAP is mean arterial pressure, PEEP is positive end-expiratory pressure, Plat is platelets, RR is respiratory rate and V<sub>T</sub>/PBW is tidal volume per predicted body weight.

**eTable 4 - Absolute 60-day Mortality Difference Among Clusters per Trial and Model**

| FACTT trial<br>(n = 998) |                  |                                     | EDEN trial<br>(n = 1000) |                  |                                     |
|--------------------------|------------------|-------------------------------------|--------------------------|------------------|-------------------------------------|
| Model                    | Patients scored* | Mortality difference among clusters | Model                    | Patients scored* | Mortality difference among clusters |
| 6                        | 93.5%            | 13.1%                               | 7                        | 77.7%            | 8.1%                                |
| 2                        | 57.4%            | 12.5%                               | 8                        | 77.7%            | 8.1%                                |
| 5                        | 65.5%            | 12.2%                               | 6                        | 84.1%            | 6.7%                                |
| 8                        | 70.2%            | 11.6%                               | 5                        | 71.7%            | 6.5%                                |
| 7                        | 70.2%            | 11.4%                               | 9                        | 84.7%            | 6.1%                                |
| 1                        | 57.4%            | 11.2%                               | 3                        | 77.7%            | 4.4%                                |
| 4                        | 70.2%            | 10.6%                               | 4                        | 77.7%            | 4.0%                                |
| 9                        | 93.5%            | 10.4%                               | 2                        | 57.7%            | 3.9%                                |
| 3                        | 70.2%            | 10.1%                               | 10                       | 87.3%            | 2.8%                                |
| 10                       | 98.8%            | 3.9%                                | 1                        | 57.7%            | 0.1%                                |

\* Number of patients without any missing data, allowing their assignment to one of the clusters.

For peer review only

**eTable 5 - List of variables in each model assessed**

| Model | Demographics |        | Arterial Blood Gases |                  |                   | Laboratory Values |      |                  |      | Vital Signs |    |    | Ventilator Variables |      |                     |
|-------|--------------|--------|----------------------|------------------|-------------------|-------------------|------|------------------|------|-------------|----|----|----------------------|------|---------------------|
|       | Age          | Gender | pH                   | PaO <sub>2</sub> | PaCO <sub>2</sub> | Creat             | Bili | HCO <sub>3</sub> | Plat | MAP         | RR | HR | FiO <sub>2</sub>     | PEEP | V <sub>T</sub> /PBW |
| 1     | X            | X      | X                    | X                | X                 | X                 | X    | X                | X    | X           | X  | X  | X                    | X    | X                   |
| 2     |              |        | X                    | X                | X                 | X                 | X    | X                | X    | X           | X  | X  | X                    | X    | X                   |
| 3     | X            | X      | X                    | X                | X                 | X                 | X    | X                |      | X           | X  | X  | X                    |      |                     |
| 4     | X            | X      | X                    | X                |                   | X                 | X    | X                |      | X           | X  | X  | X                    |      |                     |
| 5     |              |        | X                    | X                | X                 | X                 | X    | X                | X    | X           | X  | X  | X                    |      |                     |
| 6     | X            | X      | X                    | X                |                   | X                 |      | X                |      | X           | X  | X  | X                    |      |                     |
| 7     |              |        | X                    | X                | X                 | X                 | X    | X                |      | X           | X  | X  | X                    |      |                     |
| 8     |              |        | X                    | X                |                   | X                 | X    | X                |      | X           | X  | X  | X                    |      |                     |
| 9     |              |        | X                    | X                | X                 |                   |      | X                |      | X           | X  | X  |                      |      |                     |
| 10    | X            | X      |                      |                  |                   |                   |      |                  |      | X           | X  | X  |                      |      |                     |

Abbreviations: Bili denotes bilirubin, Creat is creatinine, HR is heart rate, MAP is mean arterial pressure, PEEP is positive end-expiratory pressure, Plat is platelets, RR is respiratory rate and V<sub>T</sub>/PBW is tidal volume per predicted body weight.

**eTable 6 - Baseline Characteristics and Clinical Outcomes According to the Clusters and Two Trials in the Validation Set**

|                                            | ALVEOLI                |                        |         | ARMA                   |                        |         |
|--------------------------------------------|------------------------|------------------------|---------|------------------------|------------------------|---------|
|                                            | Cluster 1<br>(n = 336) | Cluster 2<br>(n = 157) | p value | Cluster 1<br>(n = 279) | Cluster 2<br>(n = 100) | p value |
| Age, year*                                 | 53.0 (39.0 - 66.2)     | 46.0 (37.0 - 60.0)     | 0.007   | 49.0 (37.0 - 64.0)     | 47.5 (36.0 - 61.0)     | 0.180   |
| Male gender - no. (%)                      | 188 (56.0)             | 86 (54.8)              | 0.883   | 169 (60.6)             | 61 (61.0)              | 0.965   |
| Body mass index, kg/m <sup>2</sup>         | 27.0 (22.9 - 31.1)     | 25.2 (21.7 - 30.2)     | 0.050   | 25.8 (23.0 - 30.2)     | 24.4 (21.5 - 29.7)     | 0.057   |
| Caucasian - no. (%)                        | 263 (78.3)             | 102 (65.0)             | 0.002   | 220 (78.9)             | 65 (65.0)              | 0.009   |
| Etiology - no. (%)                         |                        |                        | 0.001   |                        |                        | < 0.001 |
| Pneumonia                                  | 130 (38.7)             | 66 (42.0)              |         | 83 (29.7)              | 30 (30.0)              |         |
| Sepsis                                     | 63 (18.8)              | 50 (31.8)              |         | 64 (22.9)              | 43 (43.0)              |         |
| Aspiration                                 | 55 (16.4)              | 19 (12.1)              |         | 44 (15.8)              | 14 (14.0)              |         |
| Trauma                                     | 33 (9.8)               | 5 (3.2)                |         | 43 (15.4)              | 4 (4.0)                |         |
| Other                                      | 55 (16.4)              | 17 (10.8)              |         | 45 (16.1)              | 9 (9.0)                |         |
| Prognostic scores                          |                        |                        |         |                        |                        |         |
| APACHE III                                 | 71. (59.0 - 83.0)      | 93.0 (80.0 - 110.0)    | < 0.001 | 77.0 (66.0 - 90.5)     | 97.0 (81.8 (110.0)     | < 0.001 |
| Use of vasopressor - no. (%)               | 65 (20.1)              | 80 (51.3)              | < 0.001 | 77 (27.6)              | 52 (52.5)              | < 0.001 |
| Vital signs                                |                        |                        |         |                        |                        |         |
| Temperature, °C                            | 37.6 (37.1 - 38.2)     | 37.7 (36.9 - 38.3)     | 0.778   | 37.6 (37.1 - 38.1)     | 37.6 (36.8 - 38.4)     | 0.803   |
| Heart rate, bpm                            | 97.5 (83.0 - 109)      | 111.0 (97.0 - 126)     | < 0.001 | 101.0 (89.0 - 112.5)   | 118 (105.0 - 128.0)    | < 0.001 |
| Mean arterial Pressure, mmHg               | 77.3 (77.0 - 87.3)     | 73.3 (65.0 - 80.3)     | < 0.001 | 78.0 (70.7 - 88.0)     | 70.5 (64.9 - 80.4)     | < 0.001 |
| SpO <sub>2</sub> , %                       | 96 (94 - 97)           | 95 (92 - 97)           | 0.005   | 95 (93 - 98)           | 95.5 (93 - 97)         | 0.799   |
| Urine output in 24 hours, mL               | 2065 (1355 - 3255)     | 1433 (569 - 2189)      | < 0.001 | 2100 (1375 - 3096)     | 1525 (816 - 2650)      | 0.001   |
| Laboratory tests                           |                        |                        |         |                        |                        |         |
| Hematocrit, %                              | 31.0 (28.0 - 34.0)     | 31.0 (27.0 - 35.0)     | 0.617   | 30.0 (28.0 - 33.0)     | 31.0 (28.0 - 34.0)     | 0.299   |
| White blood cell count, 10 <sup>9</sup> /L | 11.7 (8.1 - 15.3)      | 10.7 (6.4 - 15.8)      | 0.166   | 11.9 (7.7 - 16.7)      | 9.8 (5.4 - 16.7)       | 0.057   |
| Platelets, 10 <sup>9</sup> /L              | 173 (94 - 266)         | 141 (57 - 214)         | 0.001   | 139 (80 - 212)         | 125 (72 - 196)         | 0.260   |
| Creatinine, mg/dL                          | 0.9 (0.7 - 1.3)        | 1.5 (0.9 - 3.0)        | < 0.001 | 1.0 (0.7 - 1.4)        | 1.8 (1.2 - 3.2)        | < 0.001 |
| Bilirubin, mg/dL                           | 0.8 (0.5 - 1.4)        | 0.9 (0.4 - 1.8)        | 0.289   | 1.0 (0.6 - 2.1)        | 1.1 (0.7 - 2.7)        | 0.106   |
| Arterial blood gas                         |                        |                        |         |                        |                        |         |
| pH*                                        | 7.42 (7.38 - 7.45)     | 7.31 (7.24 - 7.36)     | < 0.001 | 7.42 (7.38 - 7.47)     | 7.33 (7.28 - 7.37)     | < 0.001 |
| PaO <sub>2</sub> , mmHg                    | 78 (68 - 93)           | 74 (65 - 92)           | 0.082   | 75 (66 - 91)           | 81 (68 - 96)           | 0.106   |
| PaO <sub>2</sub> / FiO <sub>2</sub>        | 149 (109 - 192)        | 103 (74 - 136)         | < 0.001 | 118 (83 - 160)         | 99 (68 - 137)          | 0.006   |



|   |                                      |                    |                    |         |                    |                    |         |
|---|--------------------------------------|--------------------|--------------------|---------|--------------------|--------------------|---------|
| 1 | PaCO <sub>2</sub> , mmHg             | 38 (34 - 43)       | 36 (31 - 42)       | 0.046   | 37 (31 - 41)       | 34 (28.8 - 39.2)   | 0.003   |
| 2 | Bicarbonate, mmol/L                  | 24 (21 - 27)       | 17 (13 - 20)       | < 0.001 | 23 (20 - 26)       | 16 (13 - 19)       | < 0.001 |
| 3 | Ventilatory variables                |                    |                    |         |                    |                    |         |
| 4 | Tidal volume, mL                     | 500 (437 - 600)    | 480 (400 - 572)    | 0.002   | 700 (600 - 750)    | 700 (550 - 700)    | 0.198   |
| 5 | Per PBW, mL/kg PBW                   | 8.0 (6.9 - 9.5)    | 7.4 (6.2 - 9.2)    | 0.006   | 10.1 (9.2 - 11.1)  | 10.6 (9.0 - 11.4)  | 0.383   |
| 6 | Plateau pressure, cmH <sub>2</sub> O | 25.0 (21.0 - 30.0) | 29.0 (24.0 - 33.0) | < 0.001 | 29.0 (24.0 - 34.0) | 31.0 (27.0 - 36.0) | 0.018   |
| 7 | PEEP, cmH <sub>2</sub> O             | 10 (5 - 10)        | 10 (8 - 14)        | < 0.001 | 8 (5 - 10)         | 10 (5 - 12)        | 0.150   |
| 8 | Respiratory rate, breaths/min        | 20 (15 - 25)       | 30 (24 - 35)       | < 0.001 | 18 (14 - 21)       | 24 (18.8 - 28)     | < 0.001 |
| 9 | FiO <sub>2</sub>                     | 0.50 (0.44 - 0.65) | 0.75 (0.60 - 1.00) | < 0.001 | 0.60 (0.50 - 0.70) | 0.70 (0.59 - 0.96) | < 0.001 |

12 Data are mean ± standard deviation, median (quartile 25<sup>th</sup> - quartile 75<sup>th</sup>) or N (%)

13 Abbreviations: APACHE denotes Acute Physiology and Chronic Health Evaluation, V<sub>T</sub>/PBW denotes tidal volume per predicted body weight.

**eTable 7 - Baseline Characteristics and Clinical Outcomes According to the Clusters and Two Trials in the Validation Set**

|                                            | SAILS                  |                        |         | ART                    |                        |         |
|--------------------------------------------|------------------------|------------------------|---------|------------------------|------------------------|---------|
|                                            | Cluster 1<br>(n = 319) | Cluster 2<br>(n = 188) | p value | Cluster 1<br>(n = 211) | Cluster 2<br>(n = 298) | p value |
| Age, year*                                 | 57.0 (46.0 - 67.0)     | 53.5 (39.0 - 65.0)     | 0.035   | 54.0 (37.0 - 65.0)     | 50.0 (35.2 - 61.0)     | 0.075   |
| Male gender - no. (%)                      | 150 (47.0)             | 100 (53.2)             | 0.211   | 136 (64.5)             | 181 (60.7)             | 0.448   |
| Body mass index, kg/m <sup>2</sup>         | 28.5 (23.9 - 34.6)     | 29.8 (23.2 - 35.1)     | 0.903   | 28.8 (24.6 - 35.6)     | 28.4 (25.0 - 31.7)     | 0.367   |
| Caucasian - no. (%)                        | 250 (78.4)             | 140 (74.5)             | 0.369   | ---                    | ---                    | ---     |
| Etiology - no. (%)                         |                        |                        | 0.709   |                        |                        | 0.052   |
| Pneumonia                                  | 228 (71.5)             | 127 (67.6)             |         | 113 (53.6)             | 171 (57.4)             |         |
| Sepsis                                     | 63 (19.7)              | 39 (20.7)              |         | 38 (18.0)              | 59 (19.8)              |         |
| Aspiration                                 | 19 (6.0)               | 15 (8.0)               |         | 13 (6.2)               | 16 (5.4)               |         |
| Trauma                                     | 3 (0.9)                | 1 (0.5)                |         | 10 (4.7)               | 2 (0.7)                |         |
| Other                                      | 6 (1.9)                | 6 (3.2)                |         | 37 (17.5)              | 50 (16.8)              |         |
| Prognostic scores                          |                        |                        |         | ---                    | ---                    | ---     |
| APACHE III                                 | 70.0 (56.0 - 84.0)     | 92.0 (75.0 - 105.8)    | < 0.001 |                        |                        |         |
| SAPS III                                   | ---                    | ---                    | ---     | 62 (50 - 71)           | 66 (53 - 75)           | 0.010   |
| Use of vasopressor - no. (%)               | 150 (47.8)             | 142 (78.5)             | < 0.001 | 130 (61.6)             | 242 (81.2)             | < 0.001 |
| Vital signs                                |                        |                        |         |                        |                        |         |
| Temperature, °C                            | 37.2 (36.7 - 37.8)     | 37.3 (36.7 - 38.0)     | 0.346   | ---                    | ---                    | ---     |
| Heart rate, bpm                            | 91.0 (80.5 - 103.0)    | 102.0 (88.8 - 117.0)   | < 0.001 | 90.0 (73.0 - 103.0)    | 112.0 (97.2 - 126.0)   | < 0.001 |
| Mean arterial Pressure, mmHg               | 78.0 (69.5 - 88.0)     | 70.0 (63.0 - 78.)      | < 0.001 | 80.0 (73.5 - 89.0)     | 75.0 (70.0 - 83.0)     | < 0.001 |
| SpO <sub>2</sub> , %                       | 96 (95 - 99)           | 96 (93 - 99)           | 0.270   | ---                    | ---                    | ---     |
| Urine output in 24 hours, mL               | 1570 (852 - 2383)      | 920 (350 - 1665)       | < 0.001 | ---                    | ---                    | ---     |
| Laboratory tests                           |                        |                        |         |                        |                        |         |
| Hematocrit, %                              | 31 (27 - 35)           | 31 (28 - 37)           | 0.142   | ---                    | ---                    | ---     |
| White blood cell count, 10 <sup>9</sup> /L | 13.6 (8.5 - 18.1)      | 15.4 (9.8 - 23.3)      | 0.009   | ---                    | ---                    | ---     |
| Platelets, 10 <sup>9</sup> /L              | 164 (96 - 238)         | 131 (80 - 223)         | 0.032   | 177 (120 - 292)        | 169 (90 - 256)         | 0.048   |
| Creatinine, mg/dL                          | 1.0 (0.7 - 1.5)        | 1.4 (0.9 - 2.6)        | < 0.001 | 1.0 (0.7 - 1.5)        | 1.7 (1.0 - 2.8)        | < 0.001 |
| Bilirubin, mg/dL                           | 0.8 (0.5 - 1.4)        | 0.8 (0.5 - 1.6)        | 0.630   | 0.6 (0.4 - 1.2)        | 0.9 (0.4 - 1.7)        | 0.002   |
| Arterial blood gas                         |                        |                        |         |                        |                        |         |
| pH*                                        | 7.39 (7.35 - 7.44)     | 7.31 (7.24 - 7.35)     | < 0.001 | 7.4 (7.3 - 7.4)        | 7.2 (7.2 - 7.3)        | < 0.001 |
| PaO <sub>2</sub> , mmHg                    | 82 (68 - 101)          | 86 (72 - 111.2)        | 0.112   | 118 (82 - 158)         | 104 (78 - 152)         | 0.065   |

|    |                                      |                    |                    |         |                    |                    |         |
|----|--------------------------------------|--------------------|--------------------|---------|--------------------|--------------------|---------|
| 1  | PaO <sub>2</sub> / FiO <sub>2</sub>  | 139 (98 - 195)     | 107 (74 - 159)     | < 0.001 | 118 (82 - 158)     | 104 (78 - 152)     | 0.065   |
| 2  | PaCO <sub>2</sub> , mmHg             | 38 (34 - 45)       | 38 (32 - 44)       | 0.423   | 46 (41 - 56)       | 53 (42 - 65)       | < 0.001 |
| 3  | Bicarbonate, mmol/L                  | 23 (20 - 26)       | 17 (14 - 21)       | < 0.001 | 25.2 (22.5 - 28.8) | 20.6 (17.8 - 23.4) | < 0.001 |
| 4  | Ventilatory variables                |                    |                    |         |                    |                    |         |
| 5  | Tidal volume, mL                     | 420 (360 - 480)    | 400 (340 - 450)    | 0.016   | 360 (320 - 400)    | 350 (300 - 397.8)  | 0.008   |
| 6  | Per PBW, mL/kg PBW                   | 6.4 (6.0 - 7.3)    | 6.1 (5.9 - 7.0)    | 0.030   | 6.0 (5.3 - 6.1)    | 5.9 (5.1 - 6.1)    | 0.034   |
| 7  | Plateau pressure, cmH <sub>2</sub> O | 22.0 (18.0 - 27.0) | 25.0 (20.0 - 29.0) | 0.003   | 24.0 (21.0 - 28.0) | 27.0 (23.0 - 30.0) | < 0.001 |
| 8  | PEEP, cmH <sub>2</sub> O             | 8 (5 - 10)         | 10 (8 - 13)        | 0.001   | 10 (10 - 14)       | 12 (10 - 14)       | < 0.001 |
| 9  | Respiratory rate, breaths/min        | 23 (19 - 27)       | 30 (24 - 35)       | < 0.001 | 24 (20 - 28)       | 30 (24 - 34)       | < 0.001 |
| 10 | FiO <sub>2</sub>                     | 0.50 (0.40 - 0.60) | 0.70 (0.50 - 0.90) | < 0.001 | 0.70 (0.60 - 0.80) | 0.80 (0.70 - 1.00) | < 0.001 |

Data are mean ± standard deviation, median (quartile 25<sup>th</sup> - quartile 75<sup>th</sup>) or N (%)

Abbreviations: APACHE denotes Acute Physiology and Chronic Health Evaluation, V<sub>T</sub>/PBW denotes tidal volume per predicted body weight...

**eTable 8 - Biomarker levels by study and cluster**

|         | ARMA                        |                             |                               |         | ALVEOLI                     |                             |                               |         |
|---------|-----------------------------|-----------------------------|-------------------------------|---------|-----------------------------|-----------------------------|-------------------------------|---------|
|         | Subphenotype A<br>(n = 279) | Subphenotype B<br>(n = 100) | Median Difference<br>(95% CI) | p value | Subphenotype A<br>(n = 336) | Subphenotype B<br>(n = 157) | Median Difference<br>(95% CI) | p value |
| ICAM-1  | 654.0 (399.0 - 959.4)       | 888.0 (550.0 - 1365.3)      | 234 (60.3 to 407.8)           | 0.002   | 847.9 (585.7 - 1227.1)      | 1070.4 (748.2 - 1588.8)     | 219.4 (90.4 to 348.4)         | < 0.001 |
| IL-6    | 214.0 (91.8 - 553.5)        | 966.0 (291.0 - 2200.0)      | 749.1 (589.9 to 908.2)        | < 0.001 | 182.5 (85.5 - 435.2)        | 775.0 (148.0 - 2846.5)      | 592 (515.5 to 668.6)          | < 0.001 |
| PAI-1   | 65.3 (37.8 - 109.5)         | 101.7 (50.8 - 291.6)        | 41 (18.3 to 63.7)             | 0.001   | Not assessed                | Not assessed                | ---                           | ---     |
| IL-8    | 46.0 (2.0 - 91.0)           | 106.9 (43.8 - 281.4)        | 60.9 (35.6 to 86.2)           | < 0.001 | Not assessed                | Not assessed                | ---                           | ---     |
| IL-10   | 16.0 (0.0 - 40.3)           | 47.9 (0.0 - 120.7)          | 31.9 (20.2 to 43.6)           | < 0.001 | Not assessed                | Not assessed                | ---                           | ---     |
| TNFR-I  | 2604.0 (1950.0 - 3777.0)    | 6897.0 (3622.5 - 12281.5)   | 4293 (3323.6 to 5262.4)       | < 0.001 | Not assessed                | Not assessed                | ---                           | ---     |
| TNFR-II | 6581.0 (4958.0 - 9658.0)    | 18611.0 (12262.5 - 35652.0) | 12030 (9577.5 to 14482.5)     | < 0.001 | Not assessed                | Not assessed                | ---                           | ---     |
| SPA     | 29.0 (11.8 - 68.0)          | 25.0 (10.5 - 40.0)          | -4 (-19.9 to 11.9)            | 0.398   | Not assessed                | Not assessed                | ---                           | ---     |
| SPD     | 76.0 (36.2 - 145.2)         | 59.0 (30.0 - 125.0)         | -18 (-52.6 to 16.6)           | 0.254   | Not assessed                | Not assessed                | ---                           | ---     |
| VW      | 308.0 (165.5 - 431.0)       | 384.0 (246.0 - 549.0)       | 76 (-26.5 to 178.5)           | 0.045   | Not assessed                | Not assessed                | ---                           | ---     |

18 Data are median (quartile 25<sup>th</sup> - quartile 75<sup>th</sup>).

19 Abbreviations: 95%CI denotes 95% confidence interval, ICAM-1 is intercellular adhesion molecule-1, IL-6 is interleukin-6, PAI-1 is plasminogen activator inhibitor-1, IL-8 is interleukin-8, IL-10 is interleukin-10, TNFR-1 is tumor necrosis factor receptor 1, TNFR-II is tumor necrosis factor II, SPA is surfact protein A, SPD is surfact Protein D and VW is Von Willebrand factor.

**eTable 9 - Percentage of missingness in biomarker levels measured on day of randomization, on ARMA and ALVEOLI trials for patients with an assigned subphenotype**

| Biomarker | ARMA<br>(n = 379) |                | ALVEOLI<br>(n = 493) |                |
|-----------|-------------------|----------------|----------------------|----------------|
|           | Subphenotype A    | Subphenotype B | Subphenotype A       | Subphenotype B |
| ICAM-1    | 43%               | 31%            | 4%                   | 3%             |
| IL-6      | 41%               | 33%            | 4%                   | 4%             |
| PAI-1     | 42%               | 32%            | Not assessed         | Not assessed   |
| IL-8      | 41%               | 33%            | Not assessed         | Not assessed   |
| IL-10     | 42%               | 33%            | Not assessed         | Not assessed   |
| TNFR-I    | 68%               | 61%            | Not assessed         | Not assessed   |
| TNFR-II   | 68%               | 61%            | Not assessed         | Not assessed   |
| SPA       | 67%               | 61%            | Not assessed         | Not assessed   |
| SPD       | 67%               | 61%            | Not assessed         | Not assessed   |
| VW        | 67%               | 61%            | Not assessed         | Not assessed   |

Abbreviations: ICAM-1 is intercellular adhesion molecule-1, IL-6 is interleukin-6, PAI-1 is plasminogen activator inhibitor-1, IL-8 is interleukin-8, IL-10 is interleukin-10, TNFR-I is tumor necrosis factor receptor 1, TNFR-II is tumor necrosis factor II, SPA is surfact protein A, SPD is surfact Protein D and VW is Von Willebrand factor.

eFigure 1 - Calinski-Harabasz Index and Elbow Method for Each of the 10 Models

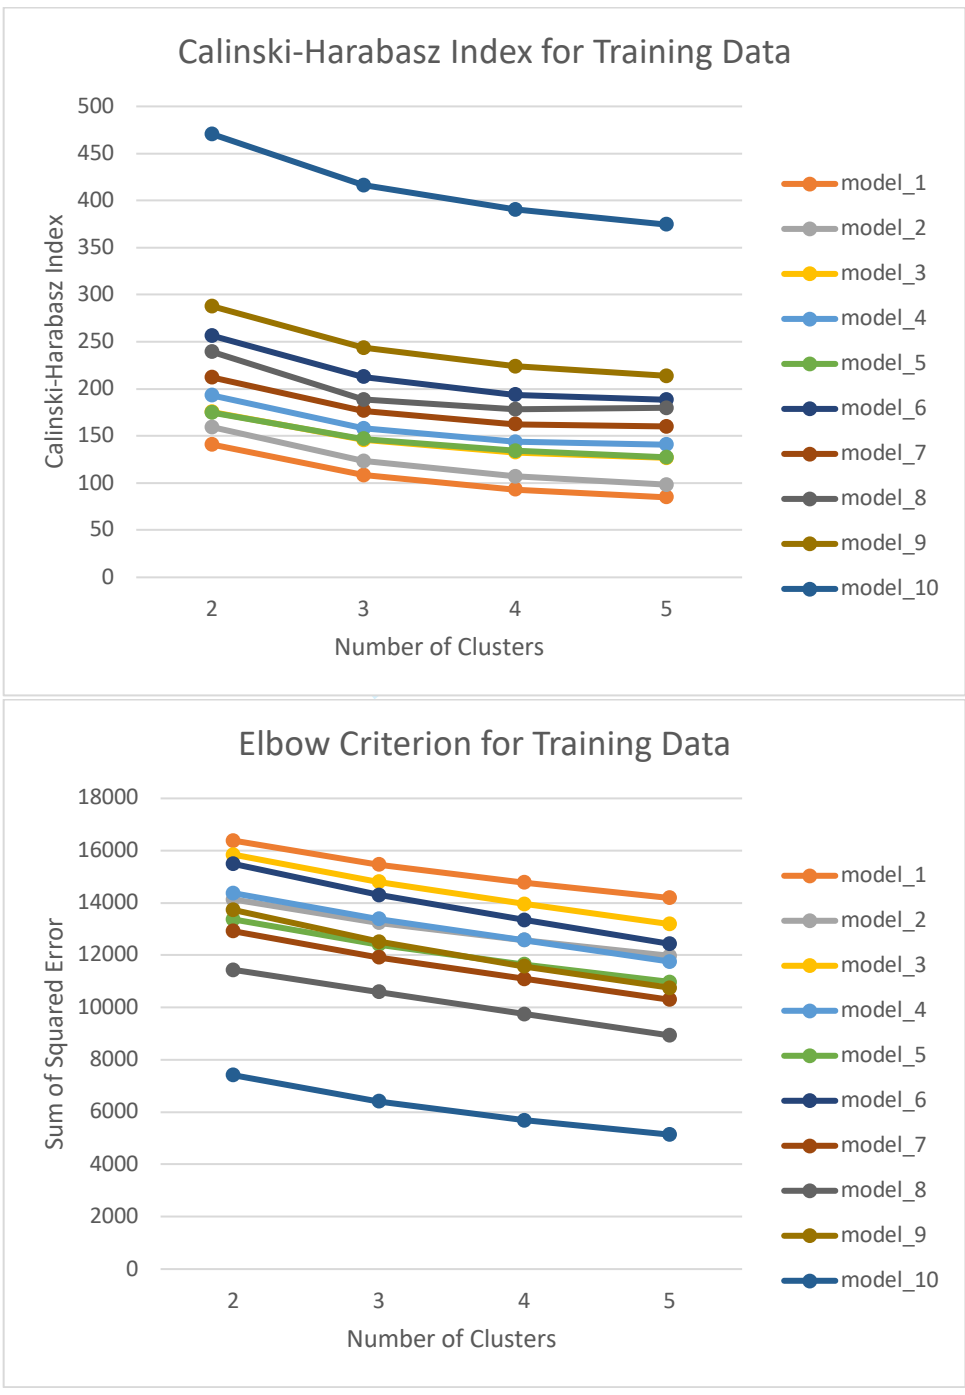

eFigure 2 - Variable Averages for Each Study

Variable Averages

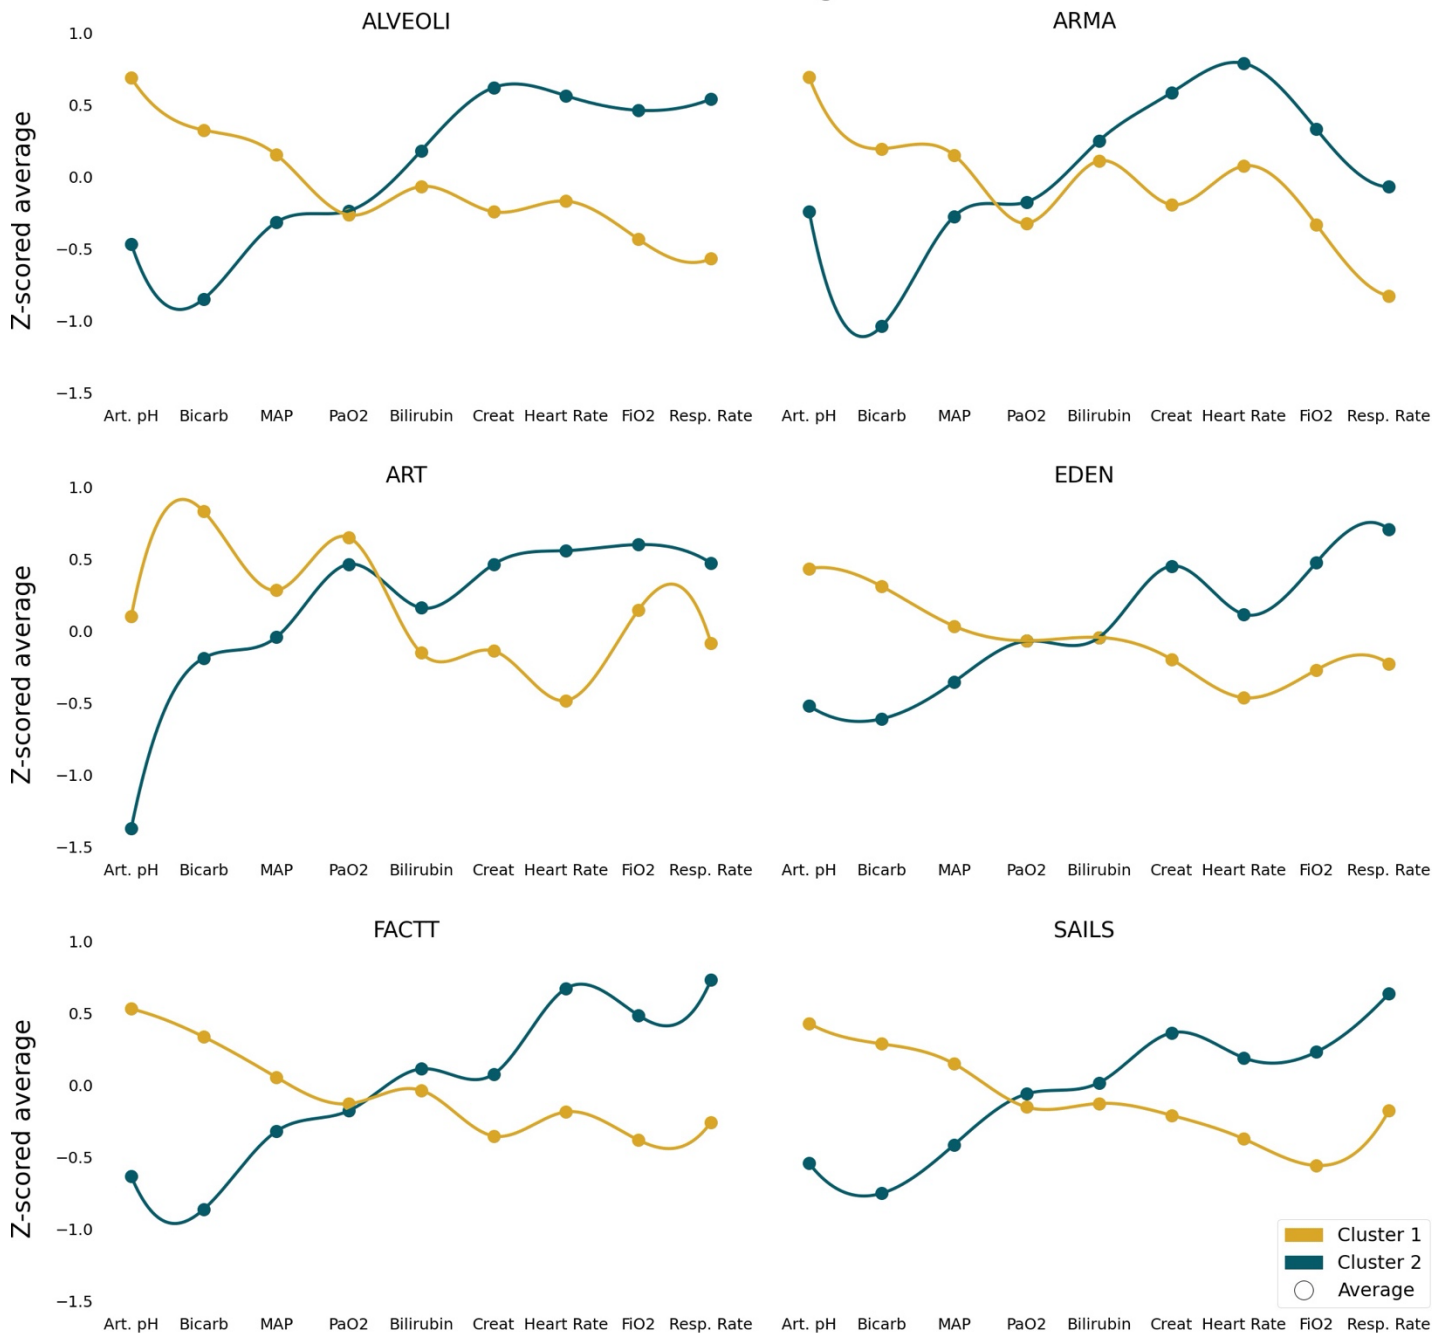

The circles represent the averages for each variable. The colored lines are exclusively to help visualize the opposite trends of the variables on the different clusters.

Abbreviations: Art. pH is arterial pH, Bicarb is bicarbonate, MAP is mean arterial pressure, Creat is creatinine and Resp. Rate is respiratory rate

1  
2  
3  
4  
5  
6  
7  
8  
9  
10  
11  
12  
13  
14  
15  
16  
17  
18  
19  
20  
21  
22  
23  
24  
25  
26  
27  
28  
29  
30  
31  
32  
33  
34  
35  
36  
37  
38  
39  
40  
41  
42  
43  
44  
45  
46  
47  
48  
49  
50  
51  
52  
53  
54  
55  
56  
57  
58  
59  
60

## Reference:

1. Yehya N, Harhay MO, Curley MAQ, Schoenfeld DA, Reeder RW. Reappraisal of Ventilator-Free Days in Critical Care Research. *Am J Respir Crit Care Med.* 2019 Oct 1;200(7):828-836. doi: 10.1164/rccm.201810-2050CP.

For peer review only



# Reporting checklist for prediction model development/validation.

Based on the TRIPOD guidelines.

## Instructions to authors

Complete this checklist by entering the page numbers from your manuscript where readers will find each of the items listed below.

Your article may not currently address all the items on the checklist. Please modify your text to include the missing information. If you are certain that an item does not apply, please write "n/a" and provide a short explanation.

Upload your completed checklist as an extra file when you submit to a journal.

In your methods section, say that you used the TRIPOD reporting guidelines, and cite them as:

Collins GS, Reitsma JB, Altman DG, Moons KG. Transparent reporting of a multivariable prediction model for individual prognosis or diagnosis (TRIPOD): The TRIPOD statement.

|                     | Reporting Item                                                                                                                                                                                                       | Page Number |
|---------------------|----------------------------------------------------------------------------------------------------------------------------------------------------------------------------------------------------------------------|-------------|
| <b>Title</b>        |                                                                                                                                                                                                                      |             |
|                     | <a href="#">#1</a> Identify the study as developing and / or validating a multivariable prediction model, the target population, and the outcome to be predicted.                                                    | 1           |
| <b>Abstract</b>     |                                                                                                                                                                                                                      |             |
|                     | <a href="#">#2</a> Provide a summary of objectives, study design, setting, participants, sample size, predictors, outcome, statistical analysis, results, and conclusions.                                           | 2           |
| <b>Introduction</b> |                                                                                                                                                                                                                      |             |
|                     | <a href="#">#3a</a> Explain the medical context (including whether diagnostic or prognostic) and rationale for developing or validating the multivariable prediction model, including references to existing models. | 6           |
|                     | <a href="#">#3b</a> Specify the objectives, including whether the study describes the                                                                                                                                | 6           |

development or validation of the model or both.

## Methods

|    |                              |                      |                                                                                                                                                                         |     |
|----|------------------------------|----------------------|-------------------------------------------------------------------------------------------------------------------------------------------------------------------------|-----|
| 1  |                              |                      |                                                                                                                                                                         |     |
| 2  |                              |                      |                                                                                                                                                                         |     |
| 3  | <b>Methods</b>               |                      |                                                                                                                                                                         |     |
| 4  |                              |                      |                                                                                                                                                                         |     |
| 5  | Source of data               | <a href="#">#4a</a>  | Describe the study design or source of data (e.g., randomized trial, cohort, or registry data), separately for the development and validation data sets, if applicable. | 8   |
| 6  |                              |                      |                                                                                                                                                                         |     |
| 7  |                              |                      |                                                                                                                                                                         |     |
| 8  |                              |                      |                                                                                                                                                                         |     |
| 9  |                              |                      |                                                                                                                                                                         |     |
| 10 | Source of data               | <a href="#">#4b</a>  | Specify the key study dates, including start of accrual; end of accrual; and, if applicable, end of follow-up.                                                          | 8   |
| 11 |                              |                      |                                                                                                                                                                         |     |
| 12 |                              |                      |                                                                                                                                                                         |     |
| 13 |                              |                      |                                                                                                                                                                         |     |
| 14 | Participants                 | <a href="#">#5a</a>  | Specify key elements of the study setting (e.g., primary care, secondary care, general population) including number and location of centres.                            | 8   |
| 15 |                              |                      |                                                                                                                                                                         |     |
| 16 |                              |                      |                                                                                                                                                                         |     |
| 17 |                              |                      |                                                                                                                                                                         |     |
| 18 | Participants                 | <a href="#">#5b</a>  | Describe eligibility criteria for participants.                                                                                                                         | 8   |
| 19 |                              |                      |                                                                                                                                                                         |     |
| 20 | Participants                 | <a href="#">#5c</a>  | Give details of treatments received, if relevant                                                                                                                        | 8   |
| 21 |                              |                      |                                                                                                                                                                         |     |
| 22 | Outcome                      | <a href="#">#6a</a>  | Clearly define the outcome that is predicted by the prediction model, including how and when assessed.                                                                  | 9   |
| 23 |                              |                      |                                                                                                                                                                         |     |
| 24 |                              |                      |                                                                                                                                                                         |     |
| 25 |                              |                      |                                                                                                                                                                         |     |
| 26 | Outcome                      | <a href="#">#6b</a>  | Report any actions to blind assessment of the outcome to be predicted.                                                                                                  | N/A |
| 27 |                              |                      |                                                                                                                                                                         |     |
| 28 |                              |                      |                                                                                                                                                                         |     |
| 29 | Predictors                   | <a href="#">#7a</a>  | Clearly define all predictors used in developing or validating the multivariable prediction model, including how and when they were measured                            | 8   |
| 30 |                              |                      |                                                                                                                                                                         |     |
| 31 |                              |                      |                                                                                                                                                                         |     |
| 32 |                              |                      |                                                                                                                                                                         |     |
| 33 |                              |                      |                                                                                                                                                                         |     |
| 34 | Predictors                   | <a href="#">#7b</a>  | Report any actions to blind assessment of predictors for the outcome and other predictors.                                                                              | N/A |
| 35 |                              |                      |                                                                                                                                                                         |     |
| 36 |                              |                      |                                                                                                                                                                         |     |
| 37 |                              |                      |                                                                                                                                                                         |     |
| 38 | Sample size                  | <a href="#">#8</a>   | Explain how the study size was arrived at.                                                                                                                              | 8   |
| 39 |                              |                      |                                                                                                                                                                         |     |
| 40 | Missing data                 | <a href="#">#9</a>   | Describe how missing data were handled (e.g., complete-case analysis, single imputation, multiple imputation) with details of any imputation method.                    | 9   |
| 41 |                              |                      |                                                                                                                                                                         |     |
| 42 |                              |                      |                                                                                                                                                                         |     |
| 43 |                              |                      |                                                                                                                                                                         |     |
| 44 |                              |                      |                                                                                                                                                                         |     |
| 45 | Statistical analysis methods | <a href="#">#10a</a> | If you are developing a prediction model describe how predictors were handled in the analyses.                                                                          | N/A |
| 46 |                              |                      |                                                                                                                                                                         |     |
| 47 |                              |                      |                                                                                                                                                                         |     |
| 48 |                              |                      |                                                                                                                                                                         |     |
| 49 | Statistical analysis methods | <a href="#">#10b</a> | If you are developing a prediction model, specify type of model, all model-building procedures (including any predictor selection), and method for internal validation. | N/A |
| 50 |                              |                      |                                                                                                                                                                         |     |
| 51 |                              |                      |                                                                                                                                                                         |     |
| 52 |                              |                      |                                                                                                                                                                         |     |
| 53 |                              |                      |                                                                                                                                                                         |     |
| 54 | Statistical analysis methods | <a href="#">#10c</a> | If you are validating a prediction model, describe how the predictions were calculated.                                                                                 | N/A |
| 55 |                              |                      |                                                                                                                                                                         |     |
| 56 |                              |                      |                                                                                                                                                                         |     |
| 57 |                              |                      |                                                                                                                                                                         |     |
| 58 | Statistical analysis         | <a href="#">#10d</a> | Specify all measures used to assess model performance and, if relevant,                                                                                                 | 10  |
| 59 |                              |                      |                                                                                                                                                                         |     |
| 60 |                              |                      |                                                                                                                                                                         |     |

|    |                      |                      |                                                                           |     |
|----|----------------------|----------------------|---------------------------------------------------------------------------|-----|
| 1  | methods              |                      | to compare multiple models.                                               |     |
| 2  | Statistical analysis | <a href="#">#10e</a> | If you are validating a prediction model, describe any model updating     | N/A |
| 3  | methods              |                      | (e.g., recalibration) arising from the validation, if done                |     |
| 4  |                      |                      |                                                                           |     |
| 5  |                      |                      |                                                                           |     |
| 6  | Risk groups          | <a href="#">#11</a>  | Provide details on how risk groups were created, if done.                 | 11  |
| 7  |                      |                      |                                                                           |     |
| 8  | Development vs.      | <a href="#">#12</a>  | For validation, identify any differences from the development data in     | 10  |
| 9  | validation           |                      | setting, eligibility criteria, outcome, and predictors.                   |     |
| 10 |                      |                      |                                                                           |     |
| 11 |                      |                      |                                                                           |     |
| 12 | <b>Results</b>       |                      |                                                                           |     |
| 13 |                      |                      |                                                                           |     |
| 14 | Participants         | <a href="#">#13a</a> | Describe the flow of participants through the study, including the        | 12  |
| 15 |                      |                      | number of participants with and without the outcome and, if applicable,   |     |
| 16 |                      |                      | a summary of the follow-up time. A diagram may be helpful.                |     |
| 17 |                      |                      |                                                                           |     |
| 18 | Participants         | <a href="#">#13b</a> | Describe the characteristics of the participants (basic demographics,     | 12  |
| 19 |                      |                      | clinical features, available predictors), including the number of         |     |
| 20 |                      |                      | participants with missing data for predictors and outcome.                |     |
| 21 |                      |                      |                                                                           |     |
| 22 | Participants         | <a href="#">#13c</a> | For validation, show a comparison with the development data of the        | 12  |
| 23 |                      |                      | distribution of important variables (demographics, predictors and         |     |
| 24 |                      |                      | outcome).                                                                 |     |
| 25 |                      |                      |                                                                           |     |
| 26 | Model                | <a href="#">#14a</a> | If developing a model, specify the number of participants and outcome     | 12  |
| 27 | development          |                      | events in each analysis.                                                  |     |
| 28 |                      |                      |                                                                           |     |
| 29 | Model                | <a href="#">#14b</a> | If developing a model, report the unadjusted association, if calculated   | N/A |
| 30 | development          |                      | between each candidate predictor and outcome.                             |     |
| 31 |                      |                      |                                                                           |     |
| 32 | Model                | <a href="#">#15a</a> | If developing a model, present the full prediction model to allow         | N/A |
| 33 | specification        |                      | predictions for individuals (i.e., all regression coefficients, and model |     |
| 34 |                      |                      | intercept or baseline survival at a given time point).                    |     |
| 35 |                      |                      |                                                                           |     |
| 36 | Model                | <a href="#">#15b</a> | If developing a prediction model, explain how to use it.                  | N/A |
| 37 | specification        |                      |                                                                           |     |
| 38 |                      |                      |                                                                           |     |
| 39 | Model                | <a href="#">#16</a>  | Report performance measures (with CIs) for the prediction model.          | 14  |
| 40 | performance          |                      |                                                                           |     |
| 41 |                      |                      |                                                                           |     |
| 42 | Model-updating       | <a href="#">#17</a>  | If validating a model, report the results from any model updating, if     | N/A |
| 43 |                      |                      | done (i.e., model specification, model performance).                      |     |
| 44 |                      |                      |                                                                           |     |
| 45 |                      |                      |                                                                           |     |
| 46 | <b>Discussion</b>    |                      |                                                                           |     |
| 47 |                      |                      |                                                                           |     |
| 48 | Limitations          | <a href="#">#18</a>  | Discuss any limitations of the study (such as nonrepresentative sample,   | 19  |
| 49 |                      |                      |                                                                           |     |
| 50 |                      |                      |                                                                           |     |

few events per predictor, missing data).

|    |                    |                      |                                                                             |
|----|--------------------|----------------------|-----------------------------------------------------------------------------|
| 1  |                    |                      |                                                                             |
| 2  |                    |                      |                                                                             |
| 3  | Interpretation     | <a href="#">#19a</a> | For validation, discuss the results with reference to performance in the 17 |
| 4  |                    |                      | development data, and any other validation data                             |
| 5  |                    |                      |                                                                             |
| 6  | Interpretation     | <a href="#">#19b</a> | Give an overall interpretation of the results, considering objectives, 17   |
| 7  |                    |                      | limitations, results from similar studies, and other relevant evidence.     |
| 8  |                    |                      |                                                                             |
| 9  |                    |                      |                                                                             |
| 10 | Implications       | <a href="#">#20</a>  | Discuss the potential clinical use of the model and implications for 20     |
| 11 |                    |                      | future research                                                             |
| 12 |                    |                      |                                                                             |
| 13 |                    |                      |                                                                             |
| 14 | <b>Other</b>       |                      |                                                                             |
| 15 | <b>information</b> |                      |                                                                             |
| 16 |                    |                      |                                                                             |
| 17 |                    |                      |                                                                             |
| 18 | Supplementary      | <a href="#">#21</a>  | Provide information about the availability of supplementary resources, 22   |
| 19 | information        |                      | such as study protocol, Web calculator, and data sets.                      |
| 20 |                    |                      |                                                                             |
| 21 | Funding            | <a href="#">#22</a>  | Give the source of funding and the role of the funders for the present 22   |
| 22 |                    |                      | study.                                                                      |
| 23 |                    |                      |                                                                             |
| 24 |                    |                      |                                                                             |

The TRIPOD checklist is distributed under the terms of the Creative Commons Attribution License CC-BY.

This checklist was completed on 07. May 2021 using <https://www.goodreports.org/>, a tool made by the

[EQUATOR Network](#) in collaboration with [Penelope.ai](#)
